# Supplementary material for: Vaccination assessments using the Demographic and Health Survey, 2005–2018: a scoping review
Source: PubMed Central journal article supplement — BMJ Open. 2020 Dec 2;10(12):e039693. doi: 10.1136/bmjopen-2020-039693 (PMC7713201; doi:10.1136/bmjopen-2020-039693), 2020-12-02
Supplement: bmjopen-2020-039693.draft_revisions.pdf [file bmjopen-2020-039693.draft_revisions.pdf]

# BMJ Open

BMJ Open is committed to open peer review. As part of this commitment we make the peer review history of every article we publish publicly available.

When an article is published we post the peer reviewers' comments and the authors' responses online. We also post the versions of the paper that were used during peer review. These are the versions that the peer review comments apply to.

The versions of the paper that follow are the versions that were submitted during the peer review process. They are not the versions of record or the final published versions. They should not be cited or distributed as the published version of this manuscript.

BMJ Open is an open access journal and the full, final, typeset and author-corrected version of record of the manuscript is available on our site with no access controls, subscription charges or pay-per-view fees (<http://bmjopen.bmj.com>).

If you have any questions on BMJ Open's open peer review process please email [info.bmjopen@bmj.com](mailto:info.bmjopen@bmj.com)

# BMJ Open

## Vaccination Assessments using the Demographic and Health Survey, 2005-2018; A Scoping Review

|                               |                                                                                                                                                                                                                                                                       |
|-------------------------------|-----------------------------------------------------------------------------------------------------------------------------------------------------------------------------------------------------------------------------------------------------------------------|
| Journal:                      | <i>BMJ Open</i>                                                                                                                                                                                                                                                       |
| Manuscript ID                 | bmjopen-2020-039693                                                                                                                                                                                                                                                   |
| Article Type:                 | Original research                                                                                                                                                                                                                                                     |
| Date Submitted by the Author: | 23-Apr-2020                                                                                                                                                                                                                                                           |
| Complete List of Authors:     | Shenton, Luke; University of Michigan, Epidemiology<br>Wagner, Abram; University of Michigan, Epidemiology<br>Ji, Mengdi; University of Michigan, Epidemiology<br>Carlson, Bradley; University of Michigan, Epidemiology<br>Boulton, Matthew; University of Michigan, |
| Keywords:                     | Paediatric infectious disease & immunisation < PAEDIATRICS, Public health < INFECTIOUS DISEASES, International health services < HEALTH SERVICES ADMINISTRATION & MANAGEMENT                                                                                          |
|                               |                                                                                                                                                                                                                                                                       |

SCHOLARONE™  
Manuscripts

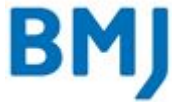

I, the Submitting Author has the right to grant and does grant on behalf of all authors of the Work (as defined in the below author licence), an exclusive licence and/or a non-exclusive licence for contributions from authors who are: i) UK Crown employees; ii) where BMJ has agreed a CC-BY licence shall apply, and/or iii) in accordance with the terms applicable for US Federal Government officers or employees acting as part of their official duties; on a worldwide, perpetual, irrevocable, royalty-free basis to BMJ Publishing Group Ltd ("BMJ") its licensees and where the relevant Journal is co-owned by BMJ to the co-owners of the Journal, to publish the Work in this journal and any other BMJ products and to exploit all rights, as set out in our [licence](#).

The Submitting Author accepts and understands that any supply made under these terms is made by BMJ to the Submitting Author unless you are acting as an employee on behalf of your employer or a postgraduate student of an affiliated institution which is paying any applicable article publishing charge ("APC") for Open Access articles. Where the Submitting Author wishes to make the Work available on an Open Access basis (and intends to pay the relevant APC), the terms of reuse of such Open Access shall be governed by a Creative Commons licence – details of these licences and which [Creative Commons](#) licence will apply to this Work are set out in our licence referred to above.

Other than as permitted in any relevant BMJ Author's Self Archiving Policies, I confirm this Work has not been accepted for publication elsewhere, is not being considered for publication elsewhere and does not duplicate material already published. I confirm all authors consent to publication of this Work and authorise the granting of this licence.

1  
2  
3  
4  
5  
6  
7  
8  
9  
10  
11  
12  
13  
14  
15  
16  
17  
18  
19  
20  
21  
22  
23  
24  
25  
26  
27  
28  
29  
30  
31  
32  
33  
34  
35  
36  
37  
38  
39  
40  
41  
42  
43  
44  
45  
46  
47  
48  
49  
50  
51  
52  
53  
54  
55  
56  
57  
58  
59  
60

1 **Vaccination Assessments using the Demographic and Health Survey, 2005-2018; A Scoping**  
2 **Review**

3  
4 Luke M. Shenton ([lshenton@umich.edu](mailto:lshenton@umich.edu)) <sup>1,\*</sup>

5 Abram L. Wagner ([awag@umich.edu](mailto:awag@umich.edu)) <sup>1,\*,†</sup>

6 Mengdi Ji ([mengdiji@umich.edu](mailto:mengdiji@umich.edu)) <sup>1</sup>

7 Bradley F. Carlson ([bcarlson@umich.edu](mailto:bcarlson@umich.edu)) <sup>1</sup>

8 Matthew L. Boulton ([mboulton@umich.edu](mailto:mboulton@umich.edu)) <sup>1,2</sup>

9  
10  
11 <sup>1</sup>Department of Epidemiology, School of Public Health, University of Michigan, 1415  
12 Washington Heights, Ann Arbor, MI 48109, USA

13  
14 <sup>2</sup>Department of Internal Medicine, Division of Infectious Disease, University of Michigan  
15 Medical School, 1500 East Medical Center Drive, Ann Arbor, MI 48109, USA

16  
17 \* Equal contributors

18  
19 † **Address correspondence to:**

20 Abram L. Wagner, 1415 Washington Heights, Ann Arbor, MI 48109, USA [[awag@umich.edu](mailto:awag@umich.edu)]

21 TEL: +001-734-763-2330 FAX: +001-734- 647-1120

22  
23  
24 **Running Head:** Scoping review of vaccination assessments

25  
26  
27 **Word Count:** 3,608    **Abstract:** 279

1  
2  
3 32 **ABSTRACT**  
4 33

5  
6 34 **Objective:** To characterize studies which have used DHS datasets to evaluate vaccination  
7 35 status.  
8 36

9 37 **Design:** Scoping review  
10 38

11  
12 39 **Data sources:** Electronic databases including PubMed, EBSCOhost, and POPLINE, from 2005-  
13 40 2018  
14 41

15  
16 42 **Study selection:** All English studies with vaccination status as the outcome and the use of  
17 43 Demographic and Health Survey (DHS) data.  
18 44

19 45 **Data extraction:** Studies were selected using a predetermined list of eligibility criteria and data  
20 46 was extracted independently by two authors. Data related to the study population, the outcome  
21 47 of interest (vaccination), and commonly seen predictors were extracted.  
22 48

23  
24 49 **Results:** A total of 125 articles were identified for inclusion in the review. The number of  
25 50 countries covered by individual studies varied widely (1 to 86), with the most published papers  
26 51 using data from India, Nigeria, Pakistan, and Ethiopia. Many different definitions of full  
27 52 vaccination were utilized although the majority used a traditional schedule recommended in  
28 53 the WHO's Expanded Program on Immunization. We found studies analyzed a wide variety of  
29 54 predictors, but the most common were maternal education, wealth, urbanicity, and child's sex.  
30 55 Most commonly reported predictors had consistent relationships with the vaccination outcome,  
31 56 outside of sibling composition.  
32 57

33  
34 58 **Conclusions:** Researchers make frequent use of the DHS dataset to describe vaccination  
35 59 patterns within one or more countries. A clearer idea of past use of DHS can inform the  
36 60 development of more rigorous studies in the future. Researchers should carefully consider  
37 61 whether a variable needs to be included in the multivariable model, or if there are mediating  
38 62 relationships across predictor variables.  
39 63

40  
41 64 **Keywords:** vaccine-preventable diseases; developing countries; immunization programs;  
42 65 surveys and questionnaires  
43 66  
44 67

45  
46  
47  
48 68 This is an Open Access article distributed in accordance with the Creative Commons  
49 69 Attribution Non Commercial (CC BY-NC 4.0) license, which permits others to distribute, remix,  
50 70 adapt, build upon this work non-commercially, and license their derivative works on different  
51 71 terms, provided the original work is properly cited and the use is non-commercial. See:  
52 72 <http://creativecommons.org/licenses/by-nc/4.0/>  
53  
54  
55  
56  
57  
58  
59  
60

1  
2  
3 73 **Strengths and limitations**

- 4 74 - The Demographic and Health Surveys (DHS) are some of the most used sources of  
5 national-level vaccination data  
6 75  
7 76 - Most DHS studies find consistent relationships between sociodemographic variables  
8 and vaccination outcomes.  
9 77  
10 78 - There are large variations in how often a country's DHS dataset is used.  
11 79 - A limitation is the use only of English language material.  
12 80 - Other national-level vaccination surveys are also used.  
13 81

14  
15  
16  
17  
18  
19  
20  
21  
22  
23  
24  
25  
26  
27  
28  
29  
30  
31  
32  
33  
34  
35  
36  
37  
38  
39  
40  
41  
42  
43  
44  
45  
46  
47  
48  
49  
50  
51  
52  
53  
54  
55  
56  
57  
58  
59  
60

For peer review only

## 82 INTRODUCTION

83  
84 Vaccinations have been a cost-effective method to control and achieve elimination and  
85 eradication of common and sometimes deadly infectious diseases [1]. The introduction of  
86 routine vaccinations in the United States, for example, has led to a >90% decline in cases of  
87 diphtheria, measles, mumps, pertussis, polio, rubella, smallpox, and tetanus since the  
88 prevaccine era [2]. Nevertheless, every year, more than 2.7 million individuals die from acute  
89 diseases caused by common vaccine-preventable diseases [3]. The overwhelming majority of  
90 vaccine-preventable deaths among children <5 years occur in low- and middle-income countries  
91 [4].

92  
93 Based on the prevalence and severity of disease and on the availability of a safe and effective  
94 vaccine, the World Health Organization (WHO) recommends that countries include nine  
95 vaccines on their publicly funded vaccine schedule for young children [5]. Referred to as the  
96 Expanded Program on Immunization (EPI), the schedule initially recommended vaccination  
97 with Bacillus Calmette-Guérin (BCG), diphtheria-tetanus-pertussis vaccine (DTP), polio vaccine,  
98 and a measles-containing vaccine (MCV). Since 2004, five additional pediatric vaccines have  
99 been added to the WHO EPI: hepatitis B vaccine (HepB), *Haemophilus influenzae* type b vaccine  
100 (Hib), rubella vaccine, pneumococcal conjugate vaccine (PCV), and rotavirus vaccine.  
101 Individual countries decide which vaccines to publicly fund and also to make available on the  
102 private market resulting in wide variation globally in the adoption of these vaccines. For  
103 example, in 2015, 194 countries included 3 doses of DTP and polio in their immunization  
104 schedule whereas only 84 included rotavirus [6]. Many countries now use a pentavalent  
105 vaccine, which includes DTP, HepB, and Hib vaccines in one vial. Substantial efforts on the part  
106 of the GAVI Alliance and other international agencies are devoted to logistically and financially  
107 supporting the introduction of new and underused vaccines [7]. These efforts are particularly  
108 important because a discouragingly high number of children consistently do not receive some  
109 or all of the vaccines that were first recommended by the WHO. According to the WHO, 19.4  
110 million children have not received three doses of DTP, with a majority (11.7 million) living in  
111 just 10 countries: Nigeria, India, Pakistan, Indonesia, Ethiopia, Philippines, the Democratic  
112 Republic of the Congo, Brazil, Angola, and Vietnam [8]. With the exception of Brazil, all of these  
113 countries have vaccination coverage regularly assessed as part of the Demographic and Health  
114 Survey (DHS) program.

115  
116 Nationally representative surveys, like those of the DHS program, have been essential to  
117 evaluating country- and region-specific vaccination program over time. DHS programs are  
118 funded and facilitated by the US Agency for International Development (USAID). The DHS  
119 program was launched in 1984 with a goal of advancing global understanding of health and  
120 population trends in developing countries. Since its inception it has provided technical  
121 assistance for over 300 surveys in 93 developing countries across the globe. Today, the program  
122 is known for collecting and disseminating accurate, nationally representative data on a variety  
123 of topics including fertility, family planning, maternal and child health, gender, HIV/AIDS,  
124 malaria, and nutrition. Host countries have ownership of data collection, analysis, presentation,

1  
2  
3 125 and use and the data is designed to ultimately be used in policy formation, program planning,  
4 126 and monitoring and evaluation [9].  
5  
6 127

7 128 A large number of prior studies have amalgamated data from several different DHS datasets, or  
8 129 have included data from many countries, but none has systematically evaluated how these past  
9 130 studies have actually used the vaccination data provided by DHS [10–12]. Given that DHS has  
10 131 had widespread use over several decades in evaluating vaccination programs through  
11 132 identification of under-vaccinated groups, and characterizing systematic barriers to vaccination,  
12 133 a clearer idea of past use of DHS can inform the development of more rigorous studies in the  
13 134 future. The purpose of this scoping review was to characterize studies which have used DHS  
14 135 datasets to evaluate vaccination status. Specifically we look at the global and temporal  
15 136 distribution of studies, list the predictors used in multivariable regression models, and examine  
16 137 the different definitions of “full vaccination” and how these relate to the WHO EPI  
17 138 recommendations  
18  
19 139

## 20 140 **METHODS**

21 141

22 142 This scoping review was completed by following the steps outlined by the Preferred Reporting  
23 143 Items of Systematic Reviews and Meta-Analyses Extension for Scoping Reviews (PRISMA-ScR)  
24 144 [13].  
25  
26 145

### 27 146 **Search Strategies**

28 147 Searches were performed in 3 different electronic databases: PubMed/MEDLINE, PopLine, and  
29 148 EBSCOhost’s Africa-Wide Information, Global Health, Global Health Archives, and Health  
30 149 Policy Reference Center databases. The search terms used were; “Vaccine” (and its variations  
31 150 such as vaccination and vaccinate), “Immunization” (and its variations such as immunize),  
32 151 “demographic and health surveys”, “demographic and health survey”, “DHS”, “National  
33 152 Family Health Survey”, and “NFHS”. In addition, the searches were limited to only return  
34 153 papers published between 1 January 2005 and 31 December 2018. References from articles  
35 154 found to be relevant were searched in order to identify additional articles.  
36  
37 155

### 38 156 **Eligibility Criteria**

39 157 The titles of all papers returned through use of the search terms were initially screened for  
40 158 relevance. The abstracts of all remaining papers were then accessed with specific inclusion and  
41 159 exclusion criteria in mind. Abstracts and manuscripts were included if they met all inclusion  
42 160 criteria: (1) studies were conducted using DHS data from low or middle-income countries; (2)  
43 161 studies looked at routine vaccination coverage as the primary outcome; (3) studies were cross-  
44 162 sectional in design; (4) studies used either the Demographic and Health Survey (DHS) or the  
45 163 National Family Health Survey (NFHS), a similar study conducted only in India; (5) studies  
46 164 looked specifically at the vaccination outcome of children (usually aged between 0 and 60  
47 165 months). A set of exclusion criteria was also created: (1) studies published before 2005 or after  
48 166 2018 (though studies with an online publication in 2018 but print publication in 2019 were  
49 167 included); (2) studies that looked only at the vaccination outcome of adults; (3) studies that  
50  
51  
52  
53  
54  
55  
56  
57  
58  
59



1  
2  
3 168 looked at population in high income countries; (4) studies that used modeling or projections  
4 169 instead of just analyzing the data provided; or (5) systematic reviews.  
5  
6 170

### 171 **Study Selection**

8 172 LS removed all duplicate and assessed all titles for relevance. Then three reviewers (LS/BC/AW)  
9 173 independently assessed all abstracts and full-text publications for eligibility using the eligibility  
10 174 criteria laid out. All disagreements were resolved by discussion between reviewers.  
11 175

### 13 176 **Data extraction**

14 177 In addition to assessment for relevance, data was also extracted independently by three  
15 178 reviewers (LS/BC/AW). A data extraction form was designed using Google Sheets and was  
16 179 piloted before beginning data extraction. Data from 3 main categories was gathered during data  
17 180 extraction. The first area was the study population, including the countries of interest, the  
18 181 subpopulation of children being examined, years of the survey administration, and whether any  
19 182 surveys besides DHS or NFHS were used. The second category was the outcome of interests:  
20 183 which individual vaccines were assessed, whether full or under vaccination was examined, and  
21 184 if full or under vaccination was examined how were they defined. Lastly, data on vaccination  
22 185 predictors was gathered. We tabulated whether a given study included the most common  
23 186 predictors found in a previous systematic review of vaccination timeliness [14]: maternal  
24 187 education, wealth index, urbanicity, sex of child, age of mother, birth order, birth delivery  
25 188 location, number of antenatal care (ANC) visits, media exposure, and paternal education.  
26 189

### 30 190 **Study Methodological quality evaluation**

31 191 We modified the Downs and Black checklist [15] for assessing biases in systematic reviews  
32 192 because all eligible studies used a similar data source. The checklist included the following  
33 193 criteria:  
34 194

#### 36 195 **Introduction / Study population**

- 37 196 A. Is the hypothesis/aim/objective of the study clearly described? (1=Yes, 0=No)  
38 197 B. Are the main outcomes (including defining full vaccination, if applicable) to be  
39 198 measured clearly described in the introduction or methods? (1=Yes, 0=No)  
40 199 C. Are the characteristics of study population eligibility criteria (including age range)  
41 200 clearly described? (1=Yes, 0=No)

#### 44 201 **Descriptive Statistics**

- 45 202 D. Does the paper use weighting and clustering? (1=Yes, 0=No)  
46 203 E. Does the paper provide estimates of random variability (e.g., 95% confidence interval of  
47 204 weighted estimates or standard errors) for the main outcomes? (1=Yes, 0=No)

#### 49 205 **Analytical Statistics**

- 50 206 F. Does the paper use do a multivariable analysis? (1=Yes, 0=No)  
51 207 G. Does the paper show distribution of confounders / covariates? (1=Yes, 0=No)  
52 208 H. Does the paper describe how the researchers arrived at the final list of confounders? (2=*a*  
53 209 *priori* knowledge or used DAG, 1=used P-values from crude analysis or used stepwise  
54 210 technique, 0=did not describe or did not use multivariable analysis)  
55  
56  
57  
58  
59  
60

1  
2  
3 211 I. Does the paper write out P-values under 0.05? (1= Yes, or provided 95% confidence  
4 212 intervals, 0=No)  
5  
6 213

7 214 The quality score could range from 0-10.  
8 215

### 9 216 **Synthesis of study findings**

10 217 Given the heterogeneity of outcomes, predictors, and study populations of the included studies  
11 218 it was not possible to combine the results into a meta-analysis. Instead, we present a narrative  
12 219 summary of the data. We describe the distribution of studies by population, what predictor  
13 220 variables are used (and what direction of association they have with outcome), and how full  
14 221 vaccination is defined. In the discussion, we provide recommendations for future analyses of  
15 222 DHS data.  
16 223

17 224 A choropleth map was created using freely available shapefiles from Natural Earth [16] in QGIS  
18 225 3.6 (QGIS Development Team). The map shows how many studies using data from only one  
19 226 country were published by country. We also show if a country's data was part of a multicountry  
20 227 study, and we identify countries which had a standard DHS dataset administered between 2003  
21 228 and 2016 but which did not have a published study. The years 2003-2016 were chosen as a lag  
22 229 time of 2 years compared to the scoping review inclusion criteria to account for delays in  
23 230 publishing the data and writing up a manuscript.  
24 231

### 25 232 **Patient and public involvement**

26 233 This research was done without public involvement. Members of the public were not invited to  
27 234 comment on the study design and were not consulted, nor were they invited to contribute to  
28 235 this document to improve accessibility.  
29 236

## 30 237 **RESULTS**

31 238  
32 239 Our search terms initially yielded 938 papers; 318 from PubMed, 323 from EBSCOhost, and 211  
33 240 from POPLINE. An additional 86 papers were identified through searching the references of  
34 241 selected papers. After removing duplicates, 551 papers remained. These papers' abstracts were  
35 242 screened using the inclusion and exclusion criteria to narrow down the study pool to 143  
36 243 papers. However, during full text screen and data extraction another 18 studies were removed,  
37 244 which left 125 (Figure 1).  
38 245

39 246 The quality sum score (possible range from 0-10) was on average 6.48 with a median of 7. The  
40 247 most commonly missed items contributing to a lower quality sum score were absence of exact  
41 248 P-values or confidence intervals (64% did not), not including estimates of random variability for  
42 249 the outcome (52%), and failure to account for appropriate use of clustering and weights (44%).  
43 250

44 251 DHS has operated in a total of 92 countries since its inception, and between 2003 and 2016, has  
45 252 conducted surveys in 71 different countries.  
46 253

1  
2  
3 254 Overall, 23 studies used DHS datasets from multiple countries, ranging from 2 countries  
4 255 [81,96,107] to 86 countries [11]. Seven studies used data from multiple African countries  
5 256 [56,69,84,98,113,122,123], 4 from just Asian countries [72,81,96,135], 1 from the Americas [107],  
6 257 and the remainder (11) used data from multiple continents [10,11,111,12,21,30,53,74,88,101,104].  
7 258 For one study, we were unable to determine what exact countries were included in the analysis  
8 259 [111].  
9 260

10 261 Figure 2 is a choropleth map showing which countries' DHS dataset have been used for  
11 262 vaccination studies. The most frequently represented country is India (26 studies, 21%),  
12 263 followed by Nigeria (17, 14%), Ethiopia and Pakistan (7 each, 6%), and Bangladesh (6, 5%).  
13 264 Notably, there are many countries (44) in the Americas, Europe, and Africa, which had one or  
14 265 more DHS conducted between 2003 and 2016 yet for which there are no corresponding single-  
15 266 country papers published using DHS data in this scoping review. However, most of these  
16 267 countries were a part of multicountry studies. Only five countries' DHS datasets were not part  
17 268 of any (single country or multicountry) DHS study: Cabo Verde, Maldives, Morocco, Sri Lanka,  
18 269 and Ukraine.  
19 270

20 271 Characteristics of the papers are shown in Table 1. About half (51%) of studies included  
21 272 children 12 to 23 or 24 months of age, and the two next most common age ranges were 12 to 59  
22 273 or 60 months of age (11%) and 0 to 59 months of age (8%).  
23 274

24 275 Full vaccination was assessed in three-fourths (94, 75%) of papers; otherwise, the four most  
25 276 common vaccines assessed one at a time were MCV (39, 31%), DTP (36, 29%), polio (33, 26%),  
26 277 and BCG (27, 22%). There were at least 12 different definitions of full vaccination used in the  
27 278 papers including in this scoping review. Of the 94 papers which evaluated full vaccination  
28 279 coverage, most (66, 70%) used a traditional schedule based off of the four vaccines first  
29 280 recommended for the WHO's EPI in 1974: 1 dose BCG, 3 doses polio, 3 doses DTP, and 1 dose  
30 281 MCV. Five (5%) papers modified this traditional definition to include a birth dose of polio, and  
31 282 eleven others used a pentavalent vaccine instead of DTP (of these, 3 had a 4 dose polio  
32 283 schedule, and 8 had a 3-dose polio schedule). Other papers modified the traditional definition  
33 284 in order to include yellow fever (in a total of 4 papers), measles-mumps-rubella vaccine (in one  
34 285 paper), or to exclude certain vaccine series, like measles, polio, or BCG. Some measure of DTP  
35 286 was included in all definitions of full vaccination. No papers included information about PCV  
36 287 or rotavirus vaccine as an outcome in a multivariable regression model, although one used  
37 288 rotavirus vaccine as a predictor variable [107].  
38 289

39 290 Four variables were used in a majority of studies. The top 10 variables used in a study (with  
40 291 their relationship shown in a model) are maternal education (in 94, or 75% of studies), wealth  
41 292 index (88, 70%), urbanicity (79, 63%), child's sex (73, 58%), mother's age (60, 48%), birth order  
42 293 (51, 41%), delivery location (42, 34%), ANC visits (34, 27%), media exposure (33, 26%), and  
43 294 paternal education (32, 26%).  
44 295

1  
2  
3 296 The relationship between the most commonly used predictor and vaccination outcomes is  
4 297 shown in Figure 3. For most predictors there is a relatively clear relationship to vaccination  
5 298 outcome. For a majority of studies, greater vaccination coverage (across any vaccination  
6 299 outcome considered) was related to maternal education (in 84% of studies that considered the  
7 300 variable), higher wealth index (83%), more ANC visits (76%), greater media exposure (76%), an  
8 301 institutional birth (69%), and more paternal education (56%). For several predictors, a large  
9 302 proportion of studies found no significant relationship. This was especially true for child's sex  
10 303 (66% of studies), more paternal education (44%), and urbanicity (43%). Sibling composition was  
11 304 one variable for which there was no clear relationship with the outcome: in 41% of studies,  
12 305 having more older siblings was associated with lower vaccination coverage, in 8% it was  
13 306 associated with higher vaccination coverage, and for the rest of studies, there was no significant  
14 307 relationship (35%) or there was a significant, non-monotonic relationship (12%).  
15  
16  
17  
18 308

## 19 309 DISCUSSION

20 310  
21 311 Vaccination programs enjoy wide support from many international health organizations and  
22 312 national governments. Vaccination has achieved the sole instance of human disease eradication  
23 313 – smallpox, while polio, measles, and rubella have been eliminated in some regions of the world  
24 314 [1,139]. Global vaccination coverage has increased in recent years but 12.8 million children in  
25 315 2015 still had not yet received DTP dose 1 [6], a common marker routine immunization  
26 316 initiation. Regularly conducted studies on vaccination uptake are necessary to assessing  
27 317 population level susceptibility and immunization program reach while also ensuring that  
28 318 countries are on track with international guidelines for maintaining high vaccination coverage  
29 319 and the control or elimination of certain vaccine-preventable diseases. The DHS datasets tend to  
30 320 be very large, both in number of variables looked at and number of participants surveyed. This  
31 321 allows the examination of many possible associations with sufficient statistical power and the  
32 322 ability to control for a number of possible confounders.  
33 323

34 324 DHS is not conducted in all LMICs, only in certain countries with a USAID presence, and it is  
35 325 conducted at irregular intervals. However, it is one of the most widely available surveys for  
36 326 assessing vaccinations globally. This systematic review found wide variation in how full  
37 327 vaccination was defined across 125 studies using DHS data between 2005 and 2018. However,  
38 328 the majority of studies did look at full vaccination and defined it according to the WHO's EPI  
39 329 schedule; 1 dose BCG, 3 doses polio, 3 doses DTP, and 1 dose MCV. Additionally, studies  
40 330 looked at similar sub-populations (children <5) and very similar predictors, with the most  
41 331 common being maternal education, wealth, urbanicity, and child's sex.  
42 332

43 333 The vaccines commonly evaluated reflect priorities of international efforts. For example, polio is  
44 334 targeted for elimination by 2018 [140]. Measles is also subject to an international elimination  
45 335 effort [141,142], and all 6 WHO regional offices have established target dates for elimination  
46 336 [143]. BCG was one of the first vaccines ideally administered shortly after birth (joined more  
47 337 recently in certain locations with HepB and polio birth doses). And DTP dose 3 has long been  
48 338 used as a proxy for adherence to repeat visits to immunization appointments [144,145]. As more  
49  
50  
51  
52  
53  
54  
55  
56  
57  
58  
59  
60

1  
2  
3 339 vaccines are added to the vaccine schedule, not only does it become more complicated, but it  
4 340 likely introduces the potential for greater diversity among countries in their respective EPI  
5 341 schedules. Over the past few decades, DHS has operated in 92 countries. However, a significant  
6 342 number of papers came from a relatively small number of countries. We note the most  
7 343 commonly used countries (India, Nigeria, Ethiopia, Pakistan, and Bangladesh) are among the 12  
8 344 most populous countries in the world, and, with the exception of Bangladesh, are among the  
9 345 five countries with the most number of unvaccinated children [8]. Given that countries have  
10 346 control over their own vaccine policies and utilize a wide variety of socioeconomic variables  
11 347 across individual countries, more country-specific analyses of DHS vaccination data is  
12 348 important.

### 13 349 14 350 **Recommendations for future analyses**

15 351  
16 352 This study identified the variables commonly used as explanatory variables in multivariable  
17 353 regression models. Many studies appeared to use the DHS datasets to test the significance and  
18 354 estimate the strength of association for many explanatory variables concomitantly. Since DHS is  
19 355 a cross-sectional study it cannot be used to look at causal associations between variables.  
20 356 However, a strength of DHS is its ability to be used as a hypothesis generating device.  
21 357 Associations can subsequently be examined in other types of studies, such as cohort studies.

22 358  
23 359 However, given consistent relationships between commonly used predictors and outcomes, it is  
24 360 worth revisiting the use of DHS datasets in multivariable analyses. First, given this consistency,  
25 361 it is more important than ever to consider the plausible causal relationships across all variables  
26 362 utilized in a model. An approach widely used in epidemiology is to chart the directionality of  
27 363 relationships among variables through directed acyclic graphs (DAGs) [146]. Online software,  
28 364 like dagitty.net, can be used to build these models and assess which variables should be  
29 365 included in the final multivariable model. A potential problem is inclusion of so many variables  
30 366 in one model can obscure the mediating effects of certain variables [147]. For example,  
31 367 researchers examining the relationship between media exposure and vaccination status may  
32 368 include maternal age as a confounder. However, the parameter estimate for maternal age in this  
33 369 multivariable model includes the mediator media exposure. Theoretically, a model with age as  
34 370 the main predictor and with media exposure as a main predictor would have different sets of  
35 371 covariates. Although the potential impact of inappropriately controlling for mediation is  
36 372 context-specific, one study suggests parameter estimates may change up to 10%-25% [148].

37 373  
38 374 Evolving immunization schedules mean that future studies will likely take local programmatic  
39 375 considerations into account. However, to make cross country comparisons, studies could still  
40 376 provide an estimate of full vaccination using the traditional BCG, 3 dose polio, 3 dose DTP, and  
41 377 1 dose MCV schedule.

42 378  
43 379 Timeliness has also emerged as an important dimension of vaccination uptake within the past  
44 380 two decades [149,150]. Measures of timeliness require vaccination dates [14], information  
45 381 missing from many individuals in the DHS datasets. For example, in the 2006-2007 Pakistan

1  
2  
3 382 DHS EPI immunization cards, and thus data on vaccination dates, were available for just 10% of  
4 383 cases [85].  
5  
6 384

7 385 Finally, researchers analyzing DHS data should be aware of its structure and limitations. Most  
8 386 DHS samples are stratified and based on clusters. Studies should use survey procedures and  
9 387 weights to ensure that estimates are representative of the national population and that standard  
10 388 errors are honest reflections of the sampling structure. Additionally, because DHS includes so  
11 389 many individuals with unknown vaccination age, any study should account for this substantial  
12 390 left censoring, through Turnbull estimation methods [151] or accelerated failure time models. A  
13 391 substantial minority of studies examined did not specify the age range of the study population.  
14 392 This has implications for timeliness but should be presented in studies calculating more  
15 393 traditional measures of vaccine uptake that do not incorporate timing or age.  
16  
17 394

18  
19 395 The DHS provides national estimates from politically neutral sources, in countries where  
20 396 USAID operates. Its continued existence ensures that reliable and nationally representative data  
21 397 sources are publicly available. Although other surveys, like the District Level Household  
22 398 Survey (DLHS) and the Annual Health Survey (AHS) in India and the Multiple Indicators  
23 399 Cluster Survey (MICS) in over 100 countries, are not funded by USAID [152,153].  
24  
25 400

## 26 401 **Limitations**

27 402

28  
29 403 There are several limitations to this study. Because the study populations, use of explanatory  
30 404 variables, and definitions of outcomes differed among studies, we were unable to conduct a  
31 405 meta-analysis to compare the association of various explanatory variables on outcomes. We did  
32 406 not examine the grey literature or non-English language papers as part of this review, nor did  
33 407 we review reports which may have listed vaccination coverage, but did not include some  
34 408 statistical analysis. Inclusion of these types of articles could have included data from more  
35 409 countries. Vaccination data from the DHS is limited in that it partially comes from information  
36 410 contained on vaccination cards [154], and partially from parental recall – with its obvious  
37 411 potential for errors. However, some countries, such as Ethiopia, have attempted to combat this  
38 412 problem in recent years through the introduction of a Health Facility Questionnaire. This  
39 413 questionnaire is used to record vaccination information for all children, who were discovered to  
40 414 not have a vaccination card during administration of the Woman's Questionnaire [155]. In  
41 415 addition, since the DHS is a standardized questionnaire there is limited opportunity to modify  
42 416 the survey to be locally relevant and take predictors into account that may only be relevant in  
43 417 parts of the country. However, overall the DHS programs are widely available surveys  
44 418 providing researchers, policymakers, and the public with nationally representative data. These  
45 419 data provide a basis for evaluation of immunization programs that would either not exist or not  
46 420 be as robust in their absence.  
47  
48 421

## 49 422 **Conclusions**

50 423  
51  
52  
53  
54  
55  
56  
57  
58  
59  
60

1  
2  
3 424 This scoping review of papers about vaccination published using DHS data found diversity in  
4 425 analyses and qualities of studies. Although certain countries – like India, Nigeria, Pakistan, and  
5 426 Ethiopia – have had  $\geq 7$  vaccination studies published using DHS data, there are dozens of  
6 427 countries whose vaccination data have not yet been published within single-country studies.  
7 428 Studies find consistent relationships between greater vaccination uptake and more maternal  
8 429 education, higher wealth index, more ANC visits, greater media exposure, and institutional  
9 430 delivery. The relationship between birth order and vaccination status is more varied across  
10 431 countries. Researchers using the DHS datasets should understand the limitations of using  
11 432 recorded vaccination dates, and should clarify the interpretation of estimates from  
12 433 multivariable analyses given the potential for mediation.  
13  
14  
15  
16  
17  
18  
19  
20  
21  
22  
23  
24  
25  
26  
27  
28  
29  
30  
31  
32  
33  
34  
35  
36  
37  
38  
39  
40  
41  
42  
43  
44  
45  
46  
47  
48  
49  
50  
51  
52  
53  
54  
55  
56  
57  
58  
59  
60

1  
2  
3 438 **Acknowledgements**

4 439  
5  
6 440 We are grateful to the DHS personnel who diligently carry out their work and to USAID for  
7 441 sponsoring the DHS projects.  
8 442

9 443 **Funding**

10 444  
11  
12 445 We report no external funding.  
13 446

14 447 **Competing Interests**

15 448  
16  
17 449 The authors declare no competing interests.  
18 450

19 451 **Author contributions**

20 452  
21  
22 453 MLB conceived of the study design, helped interpret the data, and revised the manuscript  
23 454 critically for important intellectual content. LMS and BFC downloaded manuscripts, assessed  
24 455 their fit for this systematic review, abstracted data from the manuscripts, completed qualitative  
25 456 synthesis, and helped revise the manuscript critically for important intellectual content. MJ  
26 457 abstracted data from the manuscripts and helped revise the manuscript critically for important  
27 458 intellectual content. ALW helped interpret the data, and drafted the article. All authors gave  
28 459 final approval of the manuscript to be published.  
29  
30 460

31  
32 461 **Data sharing statement**

33 462  
34 463 The data abstracted from these studies are publicly available:  
35 464 <https://doi.org/10.6084/m9.figshare.12177135>  
36 465  
37 466  
38 467  
39 468  
40 469  
41  
42  
43  
44  
45  
46  
47  
48  
49  
50  
51  
52  
53  
54  
55  
56  
57  
58  
59  
60



## REFERENCES

- 1 Centers for Disease Control and Prevention. Ten great public health achievements, 1900–1999: impact of vaccines universally recommended for children. *Morb Mortal Wkly Rep* 1999;**48**:243–8.
- 2 Roush SW, Murphy T V. Historical comparisons of morbidity and mortality for vaccine-preventable diseases in the United States. *JAMA* 2007;**298**:2155–63. doi:10.1001/jama.298.18.2155
- 3 Lozano R, Naghavi M, Foreman K, *et al*. Global and regional mortality from 235 causes of death for 20 age groups in 1990 and 2010: a systematic analysis for the Global Burden of Disease Study 2010. *Lancet* 2012;**380**:2095–128. doi:10.1016/S0140-6736(12)61728-0
- 4 Black RE, Cousens S, Johnson HL, *et al*. Global, regional, and national causes of child mortality in 2008: a systematic analysis. *Lancet (London, England)* 2010;**375**:1969–87. doi:10.1016/S0140-6736(10)60549-1
- 5 World Health Organization. Summary of WHO Position Papers - Recommendations for Routine Immunization. 2017.[http://www.who.int/immunization/policy/Immunization\\_routine\\_table1.pdf](http://www.who.int/immunization/policy/Immunization_routine_table1.pdf) (accessed 7 Sep 2017).
- 6 Casey RM, Dumolard L, Danovaro-Holliday MC, *et al*. Global Routine Vaccination Coverage, 2015. *Morb Mortal Wkly Rep* 2016;**65**:1270–3.
- 7 GAVI Alliance. Vaccine goal indicators. GAVI. 2015.<http://www.gavi.org/results/goal-level-indicators/vaccine-goal-indicators/> (accessed 2 Jun 2016).
- 8 Peck M, Gacic-Dobo M, Diallo MS, *et al*. Global routine vaccination coverage, 2018. *Morb Mortal Wkly Rep* 2019;**68**:937–42. doi:10.15585/mmwr.mm6645a3
- 9 The DHS Program. The DHS Program: Demographic and Health Surveys. 2017.<https://dhsprogram.com/> (accessed 3 Oct 2017).
- 10 Arsenault C, Johri M, Nandi A, *et al*. Country-level predictors of vaccination coverage and inequalities in Gavi-supported countries. *Vaccine* 2017;**35**:2479–88. doi:10.1016/j.vaccine.2017.03.029
- 11 Restrepo-Méndez MC, Barros AJD, Wong KLM, *et al*. Inequalities in full immunization coverage : trends in low- and middle-income countries. *Bull World Heal Organ* 2016;**94**:794–805. doi:10.2471/BLT.15.162172
- 12 Restrepo-Méndez MC, Barros AJD, Wong KLM, *et al*. Missed opportunities in full immunization coverage: Findings from low- and lower-middle-income countries. *Glob Health Action* 2016;**9**:1–6. doi:10.3402/gha.v9.30963
- 13 Moher D, Liberati A, Tetzlaff J, *et al*. Preferred reporting items for systematic reviews and meta-analyses: the PRISMA statement. *Ann Intern Med* 2009;**151**:264–9, W64.
- 14 Masters NB, Wagner AL, Boulton ML. Vaccination timeliness in low- and middle-income countries: a systematic review of the literature, 2007-2017. *Hum Vaccin Immunother* 2019;**15**:2790–805. doi:10.1080/21645515.2019.1616503
- 15 Downs SH, Black N. The feasibility of creating a checklist for the assessment of the methodological quality both of randomised and non-randomised studies of health care interventions. *J Epidemiol Community Heal* 1998;**52**:377–84.

- 1  
2  
3 513 16 Natural Earth. Admin 0 - Countries.  
4 514 2020.[https://www.naturalearthdata.com/downloads/50m-cultural-vectors/50m-admin-0-](https://www.naturalearthdata.com/downloads/50m-cultural-vectors/50m-admin-0-countries-2/)  
5 515 countries-2/ (accessed 30 Mar 2020).  
6  
7 516 17 Bowie C, Mathanga D, Misiri H. Poverty, access and immunization in Malawi - a  
8 517 descriptive study. *Malawi Med. J.* 2006;**18**:19–27. doi:10.4314/mmj.v18i1.10902  
9  
10 518 18 Choi JY, Lee S-H. Does prenatal care increase access to child immunization? Gender bias  
11 519 among children in India. *Soc Sci Med* 2006;**63**:107–17. doi:10.1016/j.socscimed.2005.11.063  
12 520 19 Gaudin S, Yazbeck AS. Immunization in india 1993-1999: Wealth, gender, and regional  
13 521 inequalities revisited. *Soc Sci Med* 2006;**62**:694–706. doi:10.1016/j.socscimed.2005.06.042  
14 522 20 Akmatov MK, Kretzschmar M, Krämer A, *et al.* Determinants of childhood vaccination  
15 523 coverage in Kazakhstan in a period of societal change: Implications for vaccination  
16 524 policies. *Vaccine* 2007;**25**:1756–63. doi:10.1016/j.vaccine.2006.11.030  
17  
18 525 21 Anand S, Bärnighausen T. Health workers and vaccination coverage in developing  
19 526 countries: an econometric analysis. *Lancet* 2007;**369**:1277–85. doi:10.1016/S0140-  
20 527 6736(07)60599-6  
21  
22 528 22 Bhandari P, Shrestha SS, Ghimire DJ. Sociocultural and geographical disparities in child  
23 529 immunization in Nepal. *Asia-Pacific Popul J* 2007;**22**:43–64.  
24 530 23 Datar A, Mukherji A, Sood N. Health infrastructure & immunization coverage in rural  
25 531 India. *Indian J Med Res* 2007;**125**:31–42.  
26  
27 532 24 Minh Thang N, Bhushan I, Bloom E, *et al.* Child immunization in Vietnam: situation and  
28 533 barriers to coverage. *J Biosoc Sci* 2007;**39**:41–58. doi:10.1017/S0021932006001234  
29 534 25 Munthali AC. Determinants of vaccination coverage in Malawi: evidence from the  
30 535 demographic and health surveys. *Malawi Med J* 2007;**19**:79–82.  
31 536 doi:10.4314/mmj.v19i2.10934  
32  
33 537 26 Ntenda PAM, Chuang K-Y, Tiruneh FN, *et al.* Analysis of the effects of individual and  
34 538 community level factors on childhood immunization in Malawi. *Vaccine* Published  
35 539 Online First: 2017. doi:10.1016/j.vaccine.2017.02.036  
36  
37 540 27 Chidiebere ODI, Uchenna E, Kenechi OS. Maternal sociodemographic factors that  
38 541 influence full child immunisation uptake in Nigeria. *SAJCH South African J Child Heal*  
39 542 2014;**8**:138–42. doi:10.7196/SAJCH.661  
40 543 28 Gatchell M, Thind A, Hagigi F. Informing state-level health policy in India: The case of  
41 544 childhood immunizations in Maharashtra and Bihar. *Acta Paediatr Int J Paediatr*  
42 545 2008;**97**:124–6. doi:10.1111/j.1651-2227.2007.00569.x  
43  
44 546 29 Halder AK, Kabir M. Inequalities in infant immunization coverage in Bangladesh. *Heal*  
45 547 *Serv Insights* 2008;**1**:5–11.  
46  
47 548 30 Meheus F, Van Doorslaer E. Achieving better measles immunization in developing  
48 549 countries: does higher coverage imply lower inequality? *Soc Sci Med* 2008;**66**:1709–18.  
49 550 doi:10.1016/j.socscimed.2007.12.036  
50 551 31 Patra N. Exploring the Determinants of Childhood Immunisation. *Econ Polit Wkly*  
51 552 2008;**43**:97–104.  
52  
53 553 32 Antai D. Inequitable childhood immunization uptake in Nigeria: a multilevel analysis of  
54 554 individual and contextual determinants. *BMC Infect Dis* 2009;**9**:181. doi:10.1186/1471-  
55 555 2334-9-181  
56  
57  
58  
59

- 1  
2  
3 556 33 Antai D. Faith and Child Survival: the Role of Religion in Childhood Immunization in  
4 557 Nigeria. *J Biosoc Sci* 2009;**41**:57. doi:10.1017/S0021932008002861
- 5 558 34 Bondy JN, Thind A, Koval JJ, *et al.* Identifying the determinants of childhood  
6 559 immunization in the Philippines. *Vaccine* 2009;**27**:169–75. doi:10.1016/j.vaccine.2008.08.042
- 7 560 35 Corsi DJ, Bassani DG, Kumar R, *et al.* Gender inequity and age-appropriate immunization  
8 561 coverage in India from 1992 to 2006. *BMC Int Health Hum Rights* 2009;**9 Suppl 1**:S3.  
9 562 doi:10.1186/1472-698X-9-S1-S3
- 10 563 36 Osaki K, Hattori T, Kosen S, *et al.* Investment in home-based maternal, newborn and  
11 564 child health records improves immunization coverage in Indonesia. *Trans R Soc Trop Med*  
12 565 *Hyg* 2009;**103**:846–8. doi:10.1016/j.trstmh.2009.03.011
- 13 566 37 Sia D, Fournier P, Kobiané J-F, *et al.* Rates of coverage and determinants of complete  
14 567 vaccination of children in rural areas of Burkina Faso (1998-2003). *BMC Public Health*  
15 568 2009;**9**:416. doi:10.1186/1471-2458-9-416
- 16 569 38 Antai D. Migration and child immunization in Nigeria: individual- and community-level  
17 570 contexts. *BMC Public Health* 2010;**10**:116. doi:10.1186/1471-2458-10-116
- 18 571 39 Hong R, Chhea V. Trend and inequality in immunization dropout among young children  
19 572 in Cambodia. *Matern Child Health J* 2010;**14**:446–52. doi:10.1007/s10995-009-0466-1
- 20 573 40 Rahman M, Obaida-Nasrin S. Factors affecting acceptance of complete immunization  
21 574 coverage of children under five years in rural Bangladesh. *Salud Publica Mex* 2010;**52**:134–  
22 575 40. doi:10.1590/S0036-36342010000200005
- 23 576 41 Sahu D, Pradhan J, Jayachandran V, *et al.* Why immunization coverage fails to catch up in  
24 577 India? A community-based analysis. *Child Care Health Dev* 2010;**36**:332–9.  
25 578 doi:10.1111/j.1365-2214.2009.01003.x
- 26 579 42 Semali IA. Trends in immunization completion and disparities in the context of health  
27 580 reforms: the case study of Tanzania. *BMC Health Serv Res* 2010;**10**:299. doi:10.1186/1472-  
28 581 6963-10-299
- 29 582 43 Abuya BA, Onsomu EO, Kimani JK, *et al.* Influence of maternal education on child  
30 583 immunization and stunting in Kenya. *Matern Child Health J* 2011;**15**:1389–99.  
31 584 doi:10.1007/s10995-010-0670-z
- 32 585 44 Antai D. Rural-urban inequities in childhood immunisation in Nigeria: The role of  
33 586 community contexts. *African J Prim Heal Care Fam Med* 2011;**3**. doi:10.4102/phcfm.v3i1.238
- 34 587 45 Fernandez RC, Awofeso N, Rammohan A. Determinants of apparent rural-urban  
35 588 differentials in measles vaccination uptake in Indonesia. *Rural Remote Health* 2011;**11**:1–14.
- 36 589 46 Fernandez R, Rammohan A, Awofeso N. Correlates of first dose of measles vaccination  
37 590 delivery and uptake in Indonesia. *Asian Pac J Trop Med* 2011;**4**:140–5. doi:10.1016/S1995-  
38 591 7645(11)60055-2
- 39 592 47 Kumar A, Mohanty SK. Socio-economic differentials in childhood immunization in India,  
40 593 1992-2006. *J Popul Res* 2011;**28**:301–24.
- 41 594 48 Lauridsen J, Pradhan J, Kruk M, *et al.* Socio-economic inequality of immunization  
42 595 coverage in India. *Health Econ Rev* 2011;**1**:11. doi:10.1186/2191-1991-1-11
- 43 596 49 Pandey S. Determinants of child immunization in Nepal : The role of women ' s  
44 597 empowerment. *Health Educ J* 2011;**71**:642–53. doi:10.1177/0017896911419343
- 45 598 50 Singh A. Inequality of Opportunity in Indian Children: The Case of Immunization and  
46  
47  
48  
49  
50  
51  
52  
53  
54  
55  
56  
57  
58  
59

- 1  
2  
3 599 Nutrition. *Popul Res Policy Rev* 2011;**30**:861–83. doi:10.1007/s11113-011-9214-5
- 4 600 51 Afzal N, Zainab B. Determinants and Status of Vaccination in Bangladesh. *Dhaka Univ J*  
5 601 *Sci* 2012;**60**:47–51. doi:10.3329/dujs.v60i1.10336
- 6 602 52 Antai D. Gender inequities, relationship power, and childhood immunization uptake in  
7 603 Nigeria: A population-based cross-sectional study. *Int J Infect Dis* 2012;**16**:e136–45.  
8 604 doi:10.1016/j.ijid.2011.11.004
- 9 605 53 Rammohan A, Awofeso N, Fernandez RC. Paternal education status significantly  
10 606 influences infants' measles vaccination uptake, independent of maternal education status.  
11 607 *BMC Public Health* 2012;**12**:336. doi:10.1186/1471-2458-12-336
- 12 608 54 Sabarwal S, McCormick MC, Silverman JG, *et al.* Association between maternal intimate  
13 609 partner violence victimization and childhood immunization in India. *J Trop Pediatr*  
14 610 2012;**58**:107–13. doi:10.1093/tropej/fmr052
- 15 611 55 Singh A. Gender based within-household inequality in childhood immunization in India:  
16 612 Changes over time and across regions. *PLoS One* 2012;**7**:e33045.  
17 613 doi:10.1371/journal.pone.0035045
- 18 614 56 Wiysonge CS, Uthman OA, Ndumbe PM, *et al.* Individual and contextual factors  
19 615 associated with low childhood immunisation coverage in Sub-Saharan Africa: A  
20 616 multilevel analysis. *PLoS One* 2012;**7**. doi:10.1371/journal.pone.0037905
- 21 617 57 Barman D, Dutta A. Access and barriers to immunization in West Bengal, India: Quality  
22 618 matters. *J Heal Popul Nutr* 2013;**31**:510–22.
- 23 619 58 Bbaale E. Factors influencing childhood immunization in Uganda. *J Heal Popul Nutr*  
24 620 2013;**31**:118–27. doi:10.3329/jhpn.v31i1.14756
- 25 621 59 Haque SMR, Bari W. Positive Role of Maternal Education on Measles Vaccination  
26 622 Coverage in Bangladesh. *Int J Psychol Behav Sci* 2013;**3**:11–7.  
27 623 doi:10.5923/j.ijpbs.20130301.02
- 28 624 60 Kumar A, Ram F. Influence of Family Structure on Child Health: Evidence From India. *J*  
29 625 *Biosoc Sci* 2013;**45**:577–99. doi:10.1017/S0021932012000764
- 30 626 61 Moyer CA, Tadesse L, Fisseha S. The relationship between facility delivery and infant  
31 627 immunization in Ethiopia. *Int J Gynecol Obstet* 2013;**123**:217–20.  
32 628 doi:10.1016/j.ijgo.2013.06.030
- 33 629 62 Singh A, Singh A, Mahapatra B. The consequences of unintended pregnancy for maternal  
34 630 and child health in rural India: Evidence from prospective data. *Matern Child Health J*  
35 631 2013;**17**:493–500. doi:10.1007/s10995-012-1023-x
- 36 632 63 Singh K, Haney E, Olorunsaiye C. Maternal autonomy and attitudes towards gender  
37 633 norms: Associations with childhood immunization in Nigeria. *Matern Child Health J*  
38 634 2013;**17**:837–41. doi:10.1007/s10995-012-1060-5
- 39 635 64 Singh PK. Trends in Child Immunization across Geographical Regions in India: Focus on  
40 636 Urban-Rural and Gender Differentials. *PLoS One* 2013;**8**. doi:10.1371/journal.pone.0073102
- 41 637 65 Van Malderen C, Ogali I, Khasakhala A, *et al.* Decomposing Kenyan socio-economic  
42 638 inequalities in skilled birth attendance and measles immunization. *Int J Equity Health*  
43 639 2013;**12**:3. doi:10.1186/1475-9276-12-3
- 44 640 66 Adegboye O, Kotze D, Adegboye O. Multi-Year Trend Analysis of Childhood  
45 641 Immunization Uptake and Coverage in Nigeria. *J Biosoc Sci* 2014;**46**:225–39.
- 46  
47  
48  
49  
50  
51  
52  
53  
54  
55  
56  
57  
58  
59  
60

- 1  
2  
3 642 doi:10.1017/S0021932013000254
- 4 643 67 Bonfrer I, Van de Poel E, Van Doorslaer E. The effects of performance incentives on the  
5 644 utilization and quality of maternal and child care in Burundi. *Soc Sci Med* 2014;**123**:96–  
6 645 104. doi:10.1016/j.socscimed.2014.11.004
- 7 646 68 Bugvi AS, Rahat R, Zakar R, *et al.* Factors associated with non-utilization of child  
8 647 immunization in Pakistan: evidence from the Demographic and Health Survey 2006-07.  
9 648 *BMC Public Health* 2014;**14**:232. doi:10.1186/1471-2458-14-232
- 10 649 69 Canavan ME, Sipsma HL, Kassie GM, *et al.* Correlates of complete childhood vaccination  
11 650 in East African countries. *PLoS One* 2014;**9**:1–7. doi:10.1371/journal.pone.0095709
- 12 651 70 Clouston S, Kidman R, Palermo T. Social inequalities in vaccination uptake among  
13 652 children aged 0-59 months living in Madagascar: An analysis of Demographic and Health  
14 653 Survey data from 2008 to 2009. *Vaccine* 2014;**32**:3533–9. doi:10.1016/j.vaccine.2014.04.030
- 15 654 71 Ebot JO. Place Matters : Community Level Effects of Women ' s Autonomy on Ethiopian  
16 655 Children ' s Immunization Status. *Etude la Popul Africaine/African Popul Stud* 2014;**28**:1202–  
17 656 15.
- 18 657 72 Grundy J, Annear P, Chomat AM, *et al.* Improving average health and persisting health  
19 658 inequities - Towards a justice and fairness platform for health policy making in Asia.  
20 659 *Health Policy Plan* 2014;**29**:873–82. doi:10.1093/heapol/czt068
- 21 660 73 Heaton TB, Crookston B, Forste R, *et al.* Inequalities in child health in Bolivia: Has  
22 661 Morales made a difference? *Heal Sociol Rev* 2014;**23**:208–18.  
23 662 doi:10.1080/14461242.2014.11081974
- 24 663 74 Helleringer S, Abdelwahab J, Vandenant M. Polio supplementary immunization activities  
25 664 and equity in access to vaccination: Evidence from the demographic and health surveys. *J*  
26 665 *Infect Dis* 2014;**210**:S531–9. doi:10.1093/infdis/jiu278
- 27 666 75 Javed SA, Imran W, Haider A, *et al.* Mothers related differentials in childhood  
28 667 immunization uptake in Pakistan. *Res Humanit Soc Sci* 2014;**4**:62–72.
- 29 668 76 Luqman B, Titus Kolawole O. Mothers' health seeking behaviour and socio-economic  
30 669 differentials: A factor analysis of full childhood immunization in South-Western Nigeria.  
31 670 *J Public Heal Epidemiol* 2014;**6**:132–47. doi:10.5897/JJPH2013.0593
- 32 671 77 Malhotra C, Malhotra R, Østbye T, *et al.* Maternal autonomy and child health care  
33 672 utilization in India: Results from the National Family Health Survey. *Asia-Pacific J Public*  
34 673 *Heal* 2014;**26**:401–13. doi:10.1177/1010539511420418
- 35 674 78 Neupane S, Nwaru BI. Impact of prenatal care utilization on infant care practices in  
36 675 Nepal: A National representative cross-sectional survey. *Eur J Pediatr* 2014;**173**:99–109.  
37 676 doi:10.1007/s00431-013-2136-y
- 38 677 79 Prusty RK, Kumar A. Socioeconomic dynamics of gender disparity in childhood  
39 678 immunization in India, 1992-2006. *PLoS One* 2014;**9**:1992–2006.  
40 679 doi:10.1371/journal.pone.0104598
- 41 680 80 Rai RK, Singh PK, Singh L, *et al.* Individual characteristics and use of maternal and child  
42 681 health services by adolescent mothers in Niger. *Matern Child Health J* 2014;**18**:592–603.  
43 682 doi:10.1007/s10995-013-1276-z
- 44 683 81 Singh PK, Parsuraman S. Sibling composition and child immunization in India and  
45 684 Pakistan, 1990-2007. *World J Pediatr* 2014;**10**:145–50. doi:10.1007/s12519-014-0483-z

- 1  
2  
3 685 82 Singh PK, Parasuraman S, P.K. S, *et al.* 'Looking beyond the male-female dichotomy' -  
4 686 sibling composition and child immunization in India, 1992-2006. *Soc Sci Med*  
5 687 2014;**107**:145–53. doi:10.1016/j.socscimed.2014.02.017  
6  
7 688 83 Ushie BA, Fayehun OA, Ugal DB. Trends and patterns of under-5 vaccination in Nigeria,  
8 689 1990-2008: What manner of progress? *Child Care Health Dev* 2014;**40**:267–74.  
9 690 doi:10.1111/cch.12055  
10  
11 691 84 Wagner Z, Szilagyi PG, Sood N. Comparative performance of public and private sector  
12 692 delivery of BCG vaccination: Evidence from Sub-Saharan Africa. *Vaccine* 2014;**32**:4522–8.  
13 693 doi:10.1016/j.vaccine.2014.06.020  
14  
15 694 85 Zaidi SMA, Khowaja S, Dharma VK, *et al.* Coverage, timeliness, and determinants of  
16 695 immunization completion in Pakistan: Evidence from the Demographic and Health  
17 696 Survey (2006-07). *Hum Vaccines Immunother* 2014;**10**:1712–20. doi:10.4161/hv.28621  
18 697 86 Abadura SA, Lerebo WT, Kulkarni U, *et al.* Individual and community level determinants  
19 698 of childhood full immunization in Ethiopia: a multilevel analysis. *BMC Public Health*  
20 699 2015;**15**:972. doi:10.1186/s12889-015-2315-z  
21  
22 700 87 Ebot JO. 'Girl power!': The relationship between women's autonomy and children's  
23 701 immunization coverage in Ethiopia. *J Heal Popul Nutr* 2015;**33**:1–9. doi:10.1186/s41043-  
24 702 015-0028-7  
25  
26 703 88 Hajizadeh M, Heymann J, Strumpf E, *et al.* Paid maternity leave and childhood  
27 704 vaccination uptake: Longitudinal evidence from 20 low-and-middle-income countries.  
28 705 *Soc Sci Med* 2015;**140**:104–17. doi:10.1016/j.socscimed.2015.07.008  
29  
30 706 89 Lakew Y, Bekele A, Biadgilign S. Factors influencing full immunization coverage among  
31 707 12–23 months of age children in Ethiopia: evidence from the national demographic and  
32 708 health survey in 2011. *BMC Public Health* 2015;**15**:728. doi:10.1186/s12889-015-2078-6  
33  
34 709 90 McGlynn N, Wilk P, Luginaah I, *et al.* Increased use of recommended maternal health  
35 710 care as a determinant of immunization and appropriate care for fever and diarrhoea in  
36 711 Ghana: An analysis pooling three demographic and health surveys. *Health Policy Plan*  
37 712 2015;**30**:895–905. doi:10.1093/heapol/czu090  
38  
39 713 91 Mukungwa T. Factors associated with full immunization coverage amongst children  
40 714 aged 12–23 months in Zimbabwe. *Etude la Popul Africaine* 2015;**29**:1761–74.  
41  
42 715 92 Onsomu EO, Abuya B a, Okech IN, *et al.* Maternal Education and Immunization Status  
43 716 Among Children in Kenya. *Matern Child Health J* 2015;**19**:1724–33. doi:10.1007/s10995-015-  
44 717 1686-1  
45  
46 718 93 Osetinsky B, Gaydos LM, Leon JS. Predictors of completed childhood vaccination in  
47 719 Bolivia. *Int J Child Adolesc health* 2015;**8**:413–23.  
48  
49 720 94 Prusty RK, Keshri K. Differentials in child nutrition and immunization among migrants  
50 721 and non-migrants in Urban India. *Int J Migr Heal Soc Care* 2015;**11**:194–205.  
51 722 doi:10.1108/IJMHSC-02-2014-0006  
52  
53 723 95 Rossi R. Do maternal living arrangements influence the vaccination status of children age  
54 724 12-23 months? A data analysis of demographic health surveys 2010-11 from Zimbabwe.  
55 725 *PLoS One* 2015;**10**:1–19. doi:10.1371/journal.pone.0132357  
56  
57 726 96 Schweitzer A, Krause G, Pessler F, *et al.* Improved coverage and timing of childhood  
58 727 vaccinations in two post-Soviet countries, Armenia and Kyrgyzstan. *BMC Public Health*

- 2015;**15**:798. doi:10.1186/s12889-015-2091-9
- 729 97 Shrivastwa N, Gillespie BW, Kolenic GE, *et al.* Predictors of Vaccination in India for  
730 Children Aged 12-36 Months. *Am J Prev Med* 2015;**49**:S435-44.  
731 doi:10.1016/j.amepre.2015.05.008
- 732 98 Singh K, Bloom S, Brodish P. Gender Equality as a Means to Improve Maternal and Child  
733 Health in Africa. *Heal Care Women Int* 2015;**36**:57-69.  
734 doi:doi:10.1080/07399332.2013.824971
- 735 99 Smith-Greenaway E, Madhavan S. Maternal migration and child health: An analysis of  
736 disruption and adaptation processes in Benin. *Soc Sci Res* 2015;**54**:146-58.  
737 doi:10.1016/j.ssresearch.2015.06.005
- 738 100 Tsawe M, Moto A, Netshivhera T, *et al.* Factors influencing the use of maternal healthcare  
739 services and childhood immunization in Swaziland. *Int J Equity Health* 2015;**14**:32.  
740 doi:10.1186/s12939-015-0162-2
- 741 101 Arsenault C, Harper S, Nandi A, *et al.* Monitoring equity in vaccination coverage: A  
742 systematic analysis of demographic and health surveys from 45 Gavi-supported  
743 countries. *Vaccine* 2016;**35**:951-9. doi:10.1016/j.vaccine.2016.12.041
- 744 102 Chima CC, Franzini L. Spillover effect of HIV-specific foreign aid on immunization  
745 services in Nigeria. *Int Health* 2016;**8**:108-15. doi:10.1093/inthealth/ihv036
- 746 103 Gurmu E, Etana D. Factors Influencing Children's Full Immunization in Ethiopia. *African*  
747 *Popul Stud* 2016;**30**:2306-17.
- 748 104 Hosseinpoor AR, Bergen N, Schlottheuber A, *et al.* State of inequality in diphtheria-  
749 tetanus-pertussis immunisation coverage in low-income and middle-income countries: A  
750 multicountry study of household health surveys. *Lancet Glob Heal* 2016;**4**:e617-26.  
751 doi:10.1016/S2214-109X(16)30141-3
- 752 105 Kriss JL, Goodson J, Machekeyanga Z, *et al.* Vaccine receipt and vaccine card availability  
753 among children of the apostolic faith: analysis from the 2010-2011 Zimbabwe  
754 demographic and health survey. *Pan Afr Med J* 2016;**24**:47.  
755 doi:10.11604/pamj.2016.24.47.8663
- 756 106 Kumar C, Singh PK, Singh L, *et al.* Socioeconomic disparities in coverage of full  
757 immunisation among children of adolescent mothers in India, 1990-2006: a repeated  
758 cross-sectional analysis. *BMJ Open* 2016;**6**:e009768. doi:10.1136/bmjopen-2015-009768
- 759 107 Schweitzer A, Pessler F, Akmatov MK. Impact of rotavirus vaccination on coverage and  
760 timing of pentavalent vaccination ??? Experience from 2 Latin American countries. *Hum*  
761 *Vaccines Immunother* 2016;**12**:1250-6. doi:10.1080/21645515.2015.1127486
- 762 108 Adedokun ST, Uthman OA, Adekanmbi VT, *et al.* Incomplete childhood immunization in  
763 Nigeria: a multilevel analysis of individual and contextual factors. *BMC Public Health*  
764 2017;**17**:236. doi:10.1186/s12889-017-4137-7
- 765 109 Aghaji AE. Trends in Measles Vaccination in Nigeria and Implications for Childhood  
766 Blindness. *Int J Med Heal Dev* 2017;**22**:82-8. doi:10.4314/jcm.v22i2.4
- 767 110 Ambel AA, Andrews C, Bakilana AM, *et al.* Examining changes in maternal and child  
768 health inequalities in Ethiopia. *Int J Equity Health* 2017;**16**:152. doi:10.1186/s12939-017-  
769 0648-1
- 770 111 Delprato M, Akyeampong K. The Effect of Early Marriage Timing on Women's and

- 1  
2  
3 771 Children's Health in Sub-Saharan Africa and Southwest Asia. *Ann Glob Heal* 2017;**83**:557–  
4 772 67. doi:10.1016/j.aogh.2017.10.005  
5  
6 773 112 Herliana P, Douiri A. Determinants of immunisation coverage of children aged 12-59  
7 774 months in Indonesia: a cross-sectional study. *BMJ Open* 2017;**7**:e015790.  
8 775 doi:10.1136/bmjopen-2016-015790  
9  
10 776 113 Kazungu JS, Adetifa IMO. Crude childhood vaccination coverage in West Africa: Trends  
11 777 and predictors of completeness. *Wellcome open Res* 2017;**2**:12.  
12 778 doi:10.12688/wellcomeopenres.10690.1  
13 779 114 KC A, Nelin V, Raaijmakers H, *et al*. Increased immunization coverage addresses the  
14 780 equity gap in Nepal. *Bull World Health Organ* 2017;**95**:261–9. doi:10.2471/BLT.16.178327  
15 781 115 Khan MT, Zaheer S, Shafique K. Maternal education, empowerment, economic status and  
16 782 child polio vaccination uptake in Pakistan: a population based cross sectional study. *BMJ*  
17 783 *Open* 2017;**7**:e013853. doi:10.1136/bmjopen-2016-013853  
18  
19 784 116 Mbengue MAS, Sarr M, Faye A, *et al*. Determinants of complete immunization among  
20 785 senegalese children aged 12-23 months: evidence from the demographic and health  
21 786 survey. *BMC Public Health* 2017;**17**:630. doi:10.1186/s12889-017-4493-3  
22  
23 787 117 Oleribe O, Kumar V, Awosika-Olumo A, *et al*. Individual and socioeconomic factors  
24 788 associated with childhood immunization coverage in Nigeria. *Pan Afr Med J* 2017;**26**:220.  
25 789 doi:10.11604/pamj.2017.26.220.11453  
26  
27 790 118 Singh A, Patel SK. Gender differentials in feeding practices, health care utilization and  
28 791 nutritional status of children in Northern India. *Int J Hum Rights Healthc* Published Online  
29 792 First: 2017. doi:10.1108/IJHRH-05-2017-0023  
30  
31 793 119 Uthman OA, Adedokun ST, Olukade T, *et al*. Children who have received no routine  
32 794 polio vaccines in Nigeria: Who are they and where do they live? *Hum Vaccin Immunother*  
33 795 2017;**13**:2111–22. doi:10.1080/21645515.2017.1336590  
34  
35 796 120 Zuhair M, Roy RB. Socioeconomic Determinants of the Utilization of Antenatal Care and  
36 797 Child Vaccination in India. *Asia-Pacific J public Heal* 2017;**29**:649–59.  
37 798 doi:10.1177/1010539517747071  
38  
39 799 121 Acharya P, Kismul H, Mapatano MA, *et al*. Individual- and community-level  
40 800 determinants of child immunization in the Democratic Republic of Congo: A multilevel  
41 801 analysis. *PLoS One* Published Online First: 2018. doi:10.1371/journal.pone.0202742  
42 802 122 Adetokunboh OO, Uthman OA, Wiysonge CS. Non-uptake of childhood vaccination  
43 803 among the children of HIV-infected mothers in sub-Saharan Africa: A multilevel analysis.  
44 804 *Hum Vaccin Immunother* 2018;**14**:2405–13. doi:10.1080/21645515.2018.1502524  
45  
46 805 123 Adetokunboh OO, Uthman OA, Wiysonge CS. Effect of maternal HIV status on  
47 806 vaccination coverage among sub-Saharan African children: A socio-ecological analysis.  
48 807 *Hum Vaccin Immunother* 2018;**14**:2373–81. doi:10.1080/21645515.2018.1467204  
49  
50 808 124 Ashbaugh HR, Hoff NA, Doshi RH, *et al*. Predictors of measles vaccination coverage  
51 809 among children 6-59 months of age in the Democratic Republic of the Congo. *Vaccine*  
52 810 2018;**36**:587–93. doi:10.1016/j.vaccine.2017.11.049  
53  
54 811 125 Asuman D, Ackah CG, Enemark U. Inequalities in child immunization coverage in  
55 812 Ghana: evidence from a decomposition analysis. *Health Econ Rev* 2018;**8**:9.  
56 813 doi:10.1186/s13561-018-0193-7  
57  
58  
59  
60



- 1  
2  
3 814 126 Boulton ML, Carlson BF, Power LE, *et al.* Socioeconomic factors associated with full  
4 815 childhood vaccination in Bangladesh, 2014. *Int J Infect Dis* Published Online First: 2018.  
5 816 doi:10.1016/j.ijid.2018.01.035  
6  
7 817 127 Burroway R, Hargrove A. Education is the antidote: Individual- and community-level  
8 818 effects of maternal education on child immunizations in Nigeria. *Soc Sci Med* 2018;**213**:63–  
9 819 71. doi:10.1016/j.socscimed.2018.07.036  
10  
11 820 128 Imran W, Abbas F, Javed SA. What is causing high polio vaccine dropout among  
12 821 Pakistani children? *Public Health* 2018;**164**:16–25. doi:10.1016/j.puhe.2018.07.008  
13 822 129 Khan J, Shil A, Prakash R. Exploring the spatial heterogeneity in different doses of  
14 823 vaccination coverage in India. *PLoS One* 2018;**13**:e0207209.  
15 824 doi:10.1371/journal.pone.0207209  
16  
17 825 130 Kols A, Gorar Z, Sharjeel M, *et al.* Provincial differences in levels, trends, and  
18 826 determinants of childhood immunization in Pakistan. *East Mediterr Heal J* 2018;**24**:333–44.  
19 827 doi:10.26719/2018.24.4.333  
20  
21 828 131 McGavin ZA, Wagner AL, Carlson BF, *et al.* Childhood full and under-vaccination in  
22 829 Nigeria, 2013. *Vaccine* 2018;**36**:7294–9. doi:10.1016/j.vaccine.2018.10.043  
23 830 132 Raza O, Lodhi FS, Morasae EK, *et al.* Differential achievements in childhood  
24 831 immunization across geographical regions of Pakistan: analysis of wealth-related  
25 832 inequality. *Int J Equity Health* 2018;**17**:122. doi:10.1186/s12939-018-0837-6  
26 833 133 Shenton LM, Wagner AL, Carlson BF, *et al.* Vaccination status of children aged 1-4 years  
27 834 in Afghanistan and associated factors, 2015. *Vaccine* 2018;**36**:5141–9.  
28 835 doi:10.1016/j.vaccine.2018.07.020  
29  
30 836 134 Shenton LM, Wagner AL, Bettampadi D, *et al.* Factors Associated with Vaccination Status  
31 837 of Children Aged 12–48 Months in India, 2012–2013. *Matern Child Health J* 2018;**22**:1–10.  
32 838 doi:10.1007/s10995-017-2409-6  
33  
34 839 135 Sohn M, Lin L, Jung M. Effects of Maternal Decisional Authority and Media Use on  
35 840 Vaccination for Children in Asian Countries. *Medicina (Kaunas)* 2018;**54**.  
36 841 doi:10.3390/medicina54060105  
37  
38 842 136 Lungu EA, Biesma R, Chirwa M, *et al.* Is the Urban Child Health Advantage Declining in  
39 843 Malawi?: Evidence from Demographic and Health Surveys and Multiple Indicator  
40 844 Cluster Surveys. *J Urban Health* 2019;**96**:131–43. doi:10.1007/s11524-018-0270-6  
41  
42 845 137 Masters NB, Wagner AL, Carlson BF, *et al.* Childhood vaccination in Kenya:  
43 846 socioeconomic determinants and disparities among the Somali ethnic community. *Int J*  
44 847 *Public Health* 2019;**64**:313–22. doi:10.1007/s00038-018-1187-2  
45  
46 848 138 Vyas P, Kim D, Adams A. Understanding Spatial and Contextual Factors Influencing  
47 849 Intraregional Differences in Child Vaccination Coverage in Bangladesh. *Asia-Pacific J*  
48 850 *public Heal* 2019;**31**:51–60. doi:10.1177/1010539518813604  
49  
50 851 139 Centers for Disease Control and Prevention. Achievements in public health: elimination  
51 852 of rubella and congenital rubella syndrome-US, 1969-2004. *MMWR Morb Mortal Wkly Rep*  
52 853 2005;**54**:279–82.  
53  
54 854 140 Mwenge W, Mbulu LK, Okeibunor J, *et al.* Polio Eradication Initiative: Contribution to  
55 855 improved communicable diseases surveillance in WHO African region. *Vaccine*  
56 856 2016;**34**:5170–4. doi:10.1016/j.vaccine.2016.05.060  
57  
58  
59  
60

- 1  
2  
3 857 141 Keegan R, Dabbagh A, Strebel PM, *et al.* Comparing measles with previous eradication  
4 858 programs: enabling and constraining factors. *J Infect Dis* 2011;**204**:S54–61.  
5 859 doi:10.1093/infdis/jir119  
6  
7 860 142 Levin A, Burgess C, Garrison LP, *et al.* Global Eradication of Measles: An Epidemiologic  
8 861 and Economic Evaluation. *J Infect Dis* 2011;**204**:S98–106. doi:10.1093/infdis/jir096  
9  
10 862 143 Thapa A, Khanal S, Sharapov U, *et al.* Progress Toward Measles Elimination - South-East  
11 863 Asia Region, 2003-2013. *MMWR Morb Mortal Wkly Rep* 2015;**64**:613–7.  
12 864 144 Tsega A, Daniel F, Steinglass R. Monitoring coverage of fully immunized children.  
13 865 *Vaccine* 2014;**32**:7047–9. doi:10.1016/j.vaccine.2014.10.057  
14 866 145 Hong R, Banta JE. Effects of extra immunization efforts on routine immunization at  
15 867 district level in Pakistan. *East Mediterr Heal J* 2005;**11**.  
16  
17 868 146 Krieger N, Smith GD. The tale wagged by the DAG: Broadening the scope of causal  
18 869 inference and explanation for epidemiology. *Int J Epidemiol* 2016;**45**:1787–808.  
19 870 doi:10.1093/ije/dyw114  
20  
21 871 147 Westreich D, Greenland S. The table 2 fallacy: Presenting and interpreting confounder  
22 872 and modifier coefficients. *Am J Epidemiol* 2013;**177**:292–8. doi:10.1093/aje/kws412  
23 873 148 Bandoli G, Palmsten K, Chambers CD, *et al.* Revisiting the Table 2 fallacy: A motivating  
24 874 example examining preeclampsia and preterm birth. *Paediatr Perinat Epidemiol*  
25 875 2018;**32**:390–7. doi:10.1111/ppe.12474  
26  
27 876 149 Bolton P, Hussain A, Hadpawat A, *et al.* Deficiencies in current childhood immunization  
28 877 indicators. *Public Heal Rep* 1998;**113**:527–32.  
29 878 150 Laubereau B, Hermann M, Schmitt HJ, *et al.* Detection of delayed vaccinations: a new  
30 879 approach to visualize vaccine uptake. *Epidemiol Infect* 2002;**128**:185–92.  
31  
32 880 151 Shrivastwa N, Gillespie BW, Lepkowski JM, *et al.* Vaccination Timeliness in Children  
33 881 under India's Universal Immunization Program. *Pediatr Infect Dis J* 2016;**35**:955–60.  
34 882 doi:10.1097/INF.0000000000001223  
35  
36 883 152 Dandona R, Pandey A, Dandona L. A review of national health surveys in India. *Bull*  
37 884 *World Heal Organ* 2016;**94**:286–96. doi:10.2471/BLT.15.158493  
38 885 153 UNICEF. Multiple Indicator Cluster Surveys. 2017.<http://mics.unicef.org/> (accessed 3 Oct  
39 886 2017).  
40  
41 887 154 Wagner AL. The use and significance of vaccination cards. *Hum Vaccin Immunother*  
42 888 2019;**15**:2844–6. doi:10.1080/21645515.2019.1625647  
43 889 155 Central Statistical Agency, The DHS Program. Ethiopia Demographic and Health Survey,  
44 890 2016. 2016.  
45 891  
46 892  
47 893

1  
2  
3 894 Figure legends  
4 895

5  
6 896 Figure 1. Diagram of studies' selection into a scoping review of vaccination studies using the  
7 897 Demographic and Health Surveys.  
8 898

9 899 Figure 2. Map of countries which have had Demographic and Health Survey (DHS) datasets  
10 900 published in vaccination studies using only one country. Countries with a DHS between 2003-  
11 901 2016 without studies are separately indicated.  
12 902

13  
14 903 Figure 3. Commonly reported predictors of vaccination status used in studies using the  
15 904 Demographic and Health Survey.  
16 905

17 906  
18 907  
19  
20  
21  
22  
23  
24  
25  
26  
27  
28  
29  
30  
31  
32  
33  
34  
35  
36  
37  
38  
39  
40  
41  
42  
43  
44  
45  
46  
47  
48  
49  
50  
51  
52  
53  
54  
55  
56  
57  
58  
59  
60

Table 1. List of papers included in a scoping review of studies assessing vaccination status using the Demographic and Health Survey (DHS).

| Author          | Year | Countries    | Age of Child                       | Vaccination Outcome                                     | Quality score |
|-----------------|------|--------------|------------------------------------|---------------------------------------------------------|---------------|
| Bowie [17]      | 2006 | Malawi       | 12-23 months                       | BCG, OPV, DTP, MCV, Full (BCG + 3OPV + 3DTP + MCV)      | 4             |
| Choi [18]       | 2006 | India        | 12-48 months                       | Full (BCG + 3OPV + 3DTP + MCV)                          | 6             |
| Gaudin [19]     | 2006 | India        | 12-23 months                       | Full (BCG + 3OPV + 3DTP + MCV)                          | 3             |
| Akmatov [20]    | 2007 | Kazakhstan   | 12-60 months                       | Full (BCG + 4OPV + 3DTP + MCV)                          | 8             |
| Anand [21]      | 2007 | Multicountry | Not specified                      | OPV, DTP, MCV                                           | 3             |
| Bhandari [22]   | 2007 | Nepal        | 12-23 months                       | BCG, OPV, DTP, MCV, Full (BCG + 3OPV + 3DTP + MCV)      | 5             |
| Datar [23]      | 2007 | India        | 2-35 months                        | OPV, Full (BCG + 3OPV + 3DTP + MCV)                     | 5             |
| Minh Thang [24] | 2007 | Vietnam      | 11-23 months                       | Full (BCG + 3OPV + 3DTP + MCV)                          | 5             |
| Munthali [25]   | 2007 | Malawi       | 12-23 months                       | Full (BCG + 3OPV + 3DTP + MCV)                          | 3             |
| Ntenda [26]     | 2007 | Malawi       | 12-23 months                       | BCG, OPV, DTP, MCV, Full (BCG + 3DTP + 3OPV + 1MCV)     | 6             |
| Chidiebere [27] | 2008 | Nigeria      | 0-23 months                        | Full (BCG + 4OPV + 3Penta + 1 MCV + YF)                 | 7             |
| Gatchell [28]   | 2008 | India        | 1-3 years                          | Full (BCG + 3OPV + 3DTP + MCV)                          | 4             |
| Halder [29]     | 2008 | Bangladesh   | 12-23 months                       | Full (BCG + 3OPV + 3DTP + MCV)                          | 6             |
| Meheus [30]     | 2008 | Multicountry | 12-23 months                       | MCV                                                     | 4             |
| Patra [31]      | 2008 | India        | 12-23 months                       | Full (BCG + 3OPV + 3DTP + MCV)                          | 6             |
| Antai [32]      | 2009 | Nigeria      | Older than 12 months               | Full (BCG + 3OPV + 3DTP + MCV)                          | 7             |
| Antai [33]      | 2009 | Nigeria      | Older than 12 months               | Full (BCG + 3OPV + 3DTP + MCV)                          | 8             |
| Bondy [34]      | 2009 | Philippines  | 12-23 months                       | Full (BCG + 3OPV + 3DTP + MCV)                          | 5             |
| Corsi [35]      | 2009 | India        | Under 5 years                      | BCG, OPV, DTP, MCV, Full (age dependent after 9 months) | 3             |
| Osaki [36]      | 2009 | Indonesia    | 12-23 months                       | Full (BCG + 3OPV + 3DTP + MCV)                          | 3             |
| Sia [37]        | 2009 | Burkina Faso | 12-23 months                       | Full (BCG + 3OPV + 3DTP + MCV + YF)                     | 6             |
| Antai [38]      | 2010 | Nigeria      | 12 months and older                | BCG, OPV, DTP, MCV, Full (BCG + 3OPV + 3DTP + MCV)      | 8             |
| Hong [39]       | 2010 | Cambodia     | 12-59 months                       | DTP                                                     | 8             |
| Rahman [40]     | 2010 | Bangladesh   | 12-59 months                       | Full (BCG + 3OPV + 3DTP + MCV)                          | 6             |
| Sahu [41]       | 2010 | India        | Preceding 2 births in last 3 years | Full (BCG + 3OPV + 3DTP + MCV)                          | 5             |
| Semali [42]     | 2010 | Tanzania     | 12-23 months                       | Full (BCG + 4OPV + 3DTP + MCV)                          | 6             |
| Abuya [43]      | 2011 | Kenya        | 12-35 months                       | Full (BCG + 3OPV + 3DTP + MCV)                          | 6             |
| Antai [44]      | 2011 | Nigeria      | 12 months and older                | Full (BCG + 3OPV + 3DTP + MCV)                          | 6             |
| Fernandez [45]  | 2011 | Indonesia    | 0-59 months                        | BCG, OPV, DTP, MCV, HepB                                | 9             |
| Fernandez [46]  | 2011 | Indonesia    | 0-59 months                        | MCV                                                     | 8             |

|    |                   |      |              |                                |                                                       |   |
|----|-------------------|------|--------------|--------------------------------|-------------------------------------------------------|---|
| 1  | Kumar [47]        | 2011 | India        | 12-23 months                   | Full (BCG + 3OPV + 3DTP + MCV)                        | 5 |
| 2  | Lauridsen [48]    | 2011 | India        | 12-23 months                   | Full (BCG + 3OPV + 3DTP + MCV)                        | 5 |
| 3  | Pandey [49]       | 2011 | Nepal        | 12-23 months                   | BCG, OPV, DTP, MCV, Full (BCG + 3OPV + 3DTP + MCV)    | 7 |
| 4  | Singh [50]        | 2011 | India        | 12-48 months                   | Full (BCG + 3OPV + 3DTP + MCV)                        | 8 |
| 5  | Afzal [51]        | 2012 | Bangladesh   | Under 5 years                  | Full (BCG + 3OPV + 3DTP + MCV)                        | 5 |
| 6  | Antai [52]        | 2012 | Nigeria      | 12-59 months                   | Full (BCG + 3OPV + 3DTP + MCV)                        | 6 |
| 7  | Rammohan [53]     | 2012 | Multicountry | Not specified                  | MCV                                                   | 5 |
| 8  | Sabarwal [54]     | 2012 | India        | 12-24 months                   | Full (BCG + 3OPV + 3DTP + MCV)                        | 7 |
| 9  | Singh [55]        | 2012 | India        | 12-59 months                   | Full (BCG + 3OPV + 3DTP + MCV)                        | 5 |
| 10 | Wiysonge [56]     | 2012 | Multicountry | 12-23 months                   | Full (DTP3)                                           | 6 |
| 11 | Barman [57]       | 2013 | India        | 12-23 months                   | Full (BCG + 3OPV + 3DTP + MCV)                        | 6 |
| 12 | Bbaale [58]       | 2013 | Uganda       | 0-36 months (12 - 36 for full) | BCG, OPV, DTP, MCV, Full (BCG + 3OPV + 3DTP + MCV)    | 8 |
| 13 | Haque [59]        | 2013 | Bangladesh   | 9-59 months                    | MCV                                                   | 8 |
| 14 | Kumar [60]        | 2013 | India        | 0-59 months                    | Full (BCG + 3OPV + 3DTP + MCV)                        | 5 |
| 15 | Moyer [61]        | 2013 | Ethiopia     | 12-24 months                   | BCG, OPV, DTP, MCV, Full (BCG + 3Penta + 4OPV + 1MCV) | 6 |
| 16 | Singh [62]        | 2013 | India        | 12-23 months                   | Full (BCG + 3OPV + 3DTP + MCV)                        | 8 |
| 17 | Singh [63]        | 2013 | Nigeria      | 12-23 months                   | Full (BCG + 3OPV + 3DTP + MCV)                        | 7 |
| 18 | Singh [64]        | 2013 | India        | 12-23 months                   | Full (BCG + 3OPV + 3DTP + MCV)                        | 7 |
| 19 | Van Malderen [65] | 2013 | Kenya        | 12-23 months                   | MCV                                                   | 6 |
| 20 | Adegboye [66]     | 2014 | Nigeria      | 12-59 months                   | Full (BCG + 3OPV + 3DTP + MCV)                        | 6 |
| 21 | Bonfrer [67]      | 2014 | Burundi      | Older than 1 year              | BCG, OPV, DTP, MCV                                    | 7 |
| 22 | Bugvi [68]        | 2014 | Pakistan     | 12-23 months                   | Full (BCG + 3DTP + 4OPV + 3HepB + 1MCV)               | 9 |
| 23 | Canavan [69]      | 2014 | Multicountry | 12-23 months                   | Full (BCG + 4OPV + 1 MCV + 3Penta)                    | 9 |
| 24 | Clouston [70]     | 2014 | Madagascar   | 0-59 months                    | BCG, OPV, DTP, MCV, Hib                               | 7 |
| 25 | Ebot [71]         | 2014 | Ethiopia     | 12-30 months                   | Full (BCG + 3OPV + 3DTP + MCV)                        | 6 |
| 26 | Grundy [72]       | 2014 | Multicountry | Not specified                  | DTP                                                   | 3 |
| 27 | Heaton [73]       | 2014 | Bolivia      | Not specified                  | Full (BCG + 3OPV + 3DTP + MCV)                        | 4 |
| 28 | Helleringer [74]  | 2014 | Multicountry | 12-23 months                   | OPV, SIA participation                                | 4 |
| 29 | Javed [75]        | 2014 | Pakistan     | 12-28 months                   | BCG, OPV, DTP, MCV, Full (BCG + 3OPV + 3DTP + MCV)    | 8 |
| 30 | Luqman [76]       | 2014 | Nigeria      | 12-23 months                   | BCG, OPV, DTP, MCV, Full (BCG + 4OPV + 3DTP + MCV)    | 6 |
| 31 | Malhotra [77]     | 2014 | India        | Older than 12 months           | Full (BCG + 3OPV + 3DTP + MCV)                        | 7 |
| 32 | Neupane [78]      | 2014 | Nepal        | Not specified                  | Full (BCG + 1DTP + 1OPV)                              | 8 |
| 33 | Prusty [79]       | 2014 | India        | 12-23 months                   | Full (BCG + 3OPV + 3DTP + MCV)                        | 7 |
| 34 | Rai [80]          | 2014 | Niger        | 12-59 months                   | Full (BCG + 3OPV + 3DTP + MCV)                        | 7 |

|    |                      |      |              |                      |                                                       |   |
|----|----------------------|------|--------------|----------------------|-------------------------------------------------------|---|
| 1  | Singh [81]           | 2014 | Multicountry | 12-23 months         | Full (BCG + 3OPV + 3DTP + MCV)                        | 5 |
| 2  | Singh [82]           | 2014 | India        | 12-36 months         | Full (BCG + 3OPV + 3DTP + MCV)                        | 8 |
| 3  | Ushie [83]           | 2014 | Nigeria      | Under 5 years        | Full (BCG + 3OPV + 3DTP + MCV)                        | 7 |
| 4  | Wagner [84]          | 2014 | Multicountry | 0-59 months          | BCG                                                   | 8 |
| 5  | Zaidi [85]           | 2014 | Pakistan     | 0-5 years            | OPV, DTP, MCV                                         | 9 |
| 6  | Abadura [86]         | 2015 | Ethiopia     | 12-59 months         | Full (BCG + 3OPV + 3DTP + MCV)                        | 8 |
| 7  | Ebot [87]            | 2015 | Ethiopia     | 12-30 months         | Full (BCG + 3OPV + 3DTP + MCV)                        | 7 |
| 8  | Hajizadeh [88]       | 2015 | Multicountry | Under 59 months      | BCG, OPV, DTP                                         | 8 |
| 9  | Lakew [89]           | 2015 | Ethiopia     | 12-23 months         | Full (BCG + 3OPV + 3DTP + MCV)                        | 8 |
| 10 | McGlynn [90]         | 2015 | Ghana        | 12-23 months         | Full (BCG + 3OPV + 3DTP + MCV)                        | 9 |
| 11 | Mukungwa [91]        | 2015 | Zimbabwe     | 12-23 months         | Full (BCG + 3OPV + 3DTP + MCV)                        | 7 |
| 12 | Onsomu [92]          | 2015 | Kenya        | 12-23 months         | BCG, OPV, DTP, MCV                                    | 8 |
| 13 | Osetinsky [93]       | 2015 | Bolivia      | 24 months - 5 years  | Full (BCG + 3 Polio + 3DTP + 1MMR + YF)               | 6 |
| 14 | Prusty [94]          | 2015 | India        | 12-23 months         | Full (BCG + 3OPV + 3DTP + MCV)                        | 6 |
| 15 | Rossi [95]           | 2015 | Zimbabwe     | 12-23 months         | Full (BCG + 3OPV + 3DTP + MCV)                        | 9 |
| 16 | Schweitzer [96]      | 2015 | Multicountry | 12-59 months         | DTP, MCV                                              | 6 |
| 17 | Shrivastwa [97]      | 2015 | India        | 12-36 months         | Full (BCG + 3OPV + 3DTP + MCV)                        | 7 |
| 18 | Singh [98]           | 2015 | Multicountry | 12-23 months         | Full (BCG + 3OPV + 3DTP + MCV)                        | 7 |
| 19 | Smith-Greenaway [99] | 2015 | Benin        | 1-59 months          | Ever received any vaccine                             | 6 |
| 20 | Tsawe [100]          | 2015 | eSwatini     | Not specified        | Ever received any vaccine                             | 9 |
| 21 | Arsenault [101]      | 2016 | Multicountry | 12-23 months         | DTP, MCV                                              | 5 |
| 22 | Chima [102]          | 2016 | Nigeria      | 12-59 months         | BCG, OPV, DTP, MCV                                    | 6 |
| 23 | Gurmu [103]          | 2016 | Ethiopia     | 12-23 months         | Full (BCG + 3OPV + 3DTP + MCV)                        | 6 |
| 24 | Hosseinpoor [104]    | 2016 | Multicountry | 12-23 months in most | DTP                                                   | 5 |
| 25 | Kriss [105]          | 2016 | Zimbabwe     | 12-23 months         | BCG, OPV, DTP, MCV, Full (BCG + 3OPV + 3Penta + 1MCV) | 9 |
| 26 | Kumar [106]          | 2016 | India        | 12-23 months         | Full (BCG + 3DTP + 3OPV + 1MCV)                       | 9 |
| 27 | Restrepo-Méndez [11] | 2016 | Multicountry | 12-23 months in most | Full (BCG + 3DTP + 3OPV + 1MCV)                       | 6 |
| 28 | Restrepo-Méndez [12] | 2016 | Multicountry | 12-23 months         | BCG, OPV, DTP, MCV, Full (BCG + 3DTP + 3OPV + 1MCV)   | 4 |
| 29 | Schweitzer [107]     | 2016 | Multicountry | Birth - 250 weeks    | DTP                                                   | 5 |
| 30 | Adedokun [108]       | 2017 | Nigeria      | 12-23 months         | Full (BCG + 3OPV + 3Penta + MCV)                      | 7 |
| 31 | Aghaji [109]         | 2017 | Nigeria      | 12-23 months         | MCV                                                   | 4 |

|    |                   |      |              |               |                                                          |    |
|----|-------------------|------|--------------|---------------|----------------------------------------------------------|----|
| 1  | Ambel [110]       | 2017 | Ethiopia     | 12-23 months  | MCV, Full (BCG + 3DTP + 3OPV + 1MCV)                     | 4  |
| 2  | Arsenault [10]    | 2017 | Multicountry | 12-23 months  | DTP, MCV                                                 | 8  |
| 3  | Delprato [111]    | 2017 | Multicountry | Not specified | Full (BCG + DTP + OPV + MCV (no. unspecified))           | 5  |
| 4  | Herliana [112]    | 2017 | Indonesia    | 12-59 months  | Full (BCG + 3DTP + 4OPV + 1MCV + 1HepB                   | 9  |
| 5  | Kazungu [113]     | 2017 | Multicountry | 12-23 months  | Full (BCG + 3DTP + 3OPV + 1MCV)                          | 7  |
| 6  | KC [114]          | 2017 | Nepal        | Not specified | BCG, OPV, DTP, MCV, Full (BCG + 3DTP + 3OPV + 1MCV)      | 6  |
| 7  | Khan [115]        | 2017 | Pakistan     | Under 5 years | OPV                                                      | 7  |
| 8  | Mbengue [116]     | 2017 | Senegal      | 12-23 months  | Full (BCG + 3Penta + 3OPV + 1MCV)                        | 8  |
| 9  | Oleribe [117]     | 2017 | Nigeria      | 12-24 months  | BCG, OPV, DTP, MCV, Full (BCG + 3DTP + 3OPV dose + 1MCV) | 5  |
| 10 | Singh [118]       | 2017 | India        | 12-13 months  | Full (Not defined)                                       | 6  |
| 11 | Uthman [119]      | 2017 | Nigeria      | 12-23 months  | OPV                                                      | 9  |
| 12 | Zuhair [120]      | 2017 | India        | Not specified | BCG, OPV, DTP, MCV                                       | 7  |
| 13 | Acharya [121]     | 2018 | DRC          | 12-23 months  | Full (BCG +3DTP + 3OPV + 1MCV)                           | 9  |
| 14 | Adetokunboh [122] | 2018 | Multicountry | 12-23 months  | DTP                                                      | 6  |
| 15 | Adetokunboh [123] | 2018 | Multicountry | 12-23 months  | DTP                                                      | 4  |
| 16 | Ashbaugh [124]    | 2018 | DRC          | 6-59 months   | MCV                                                      | 9  |
| 17 | Asuman [125]      | 2018 | Ghana        | 12-59 months  | Full (BCG + 3DTP + 3OPV + 1MCV)                          | 8  |
| 18 | Boulton [126]     | 2018 | Bangladesh   | 12-24 months  | BCG, OPV, DTP, MCV, Full (BCG + 3Penta + 3OPV + 1MCV)    | 7  |
| 19 | Burroway [127]    | 2018 | Nigeria      | 12-24 months  | Full (BCG + 3DTP + 4OPV + 1MCV)                          | 7  |
| 20 | Imran [128]       | 2018 | Pakistan     | 12-23 months  | OPV                                                      | 7  |
| 21 | Khan [129]        | 2018 | India        | 12-23 months  | BCG, OPV, DTP, MCV, Full (BCG + 3DTP + 3 OPV + 1MCV)     | 9  |
| 22 | Kols [130]        | 2018 | Pakistan     | 12-23 months  | BCG, OPV, DTP, MCV, Full (BCG +3DTP + 3OPV + 1MCV)       | 9  |
| 23 | McGavin [131]     | 2018 | Nigeria      | 12-24 months  | Full (BCG + 3DTP + 4OPV + 1MCV)                          | 9  |
| 24 | Raza [132]        | 2018 | Pakistan     | 12-23 months  | Full (BCG +3DTP + 3OPV + 3HepB + 3Hib + 1MCV)            | 5  |
| 25 | Shenton [133]     | 2018 | Afghanistan  | 12-60 months  | Full (BCG +3Penta + 3OPV + 1MCV)                         | 10 |
| 26 | Shenton [134]     | 2018 | India        | 12-48 months  | Full (BCG + 3OPV + 3DTP + MCV)                           | 8  |
| 27 | Sohn [135]        | 2018 | Multicountry | Not specified | BCG, OPV, DTP, MCV                                       | 7  |
| 28 | Lungu [136]       | 2019 | Malawi       | Not specified | Full (not specified)                                     | 1  |
| 29 | Masters [137]     | 2019 | Kenya        | 12-23 months  | BCG, OPV, DTP, MCV, Full (BCG + 3Penta + 3OPV + 1MCV)    | 10 |
| 30 | Vyas [138]        | 2019 | Bangladesh   | Not specified | BCG, DTP, MCV                                            | 3  |

Notes:

1 BCG, bacillus Calmette-Guérin; DRC, Democratic Republic of the Congo; DTP, diphtheria –tetanus-pertussis vaccine; HepB, hepatitis B vaccine;  
2 Hib, *Haemophilus influenzae* type b vaccine; MCV, measles-containing vaccine; MMR, measles-mumps-rubella vaccine; OPV, oral polio vaccine;  
3 Penta, pentavalent vaccine; SIA, supplementary immunization activity; YF, yellow fever  
4  
5  
6  
7  
8  
9  
10  
11  
12  
13  
14  
15  
16  
17  
18  
19  
20  
21  
22  
23  
24  
25  
26  
27  
28  
29  
30  
31  
32  
33  
34  
35  
36  
37  
38  
39  
40  
41  
42  
43  
44  
45  
46  
47

For peer review only



1  
2  
3  
4  
5  
6  
7  
8  
9  
10  
11  
12  
13  
14  
15  
16  
17  
18  
19  
20  
21  
22  
23  
24  
25  
26  
27  
28  
29  
30  
31  
32  
33  
34  
35  
36  
37  
38  
39  
40  
41  
42  
43  
44  
45

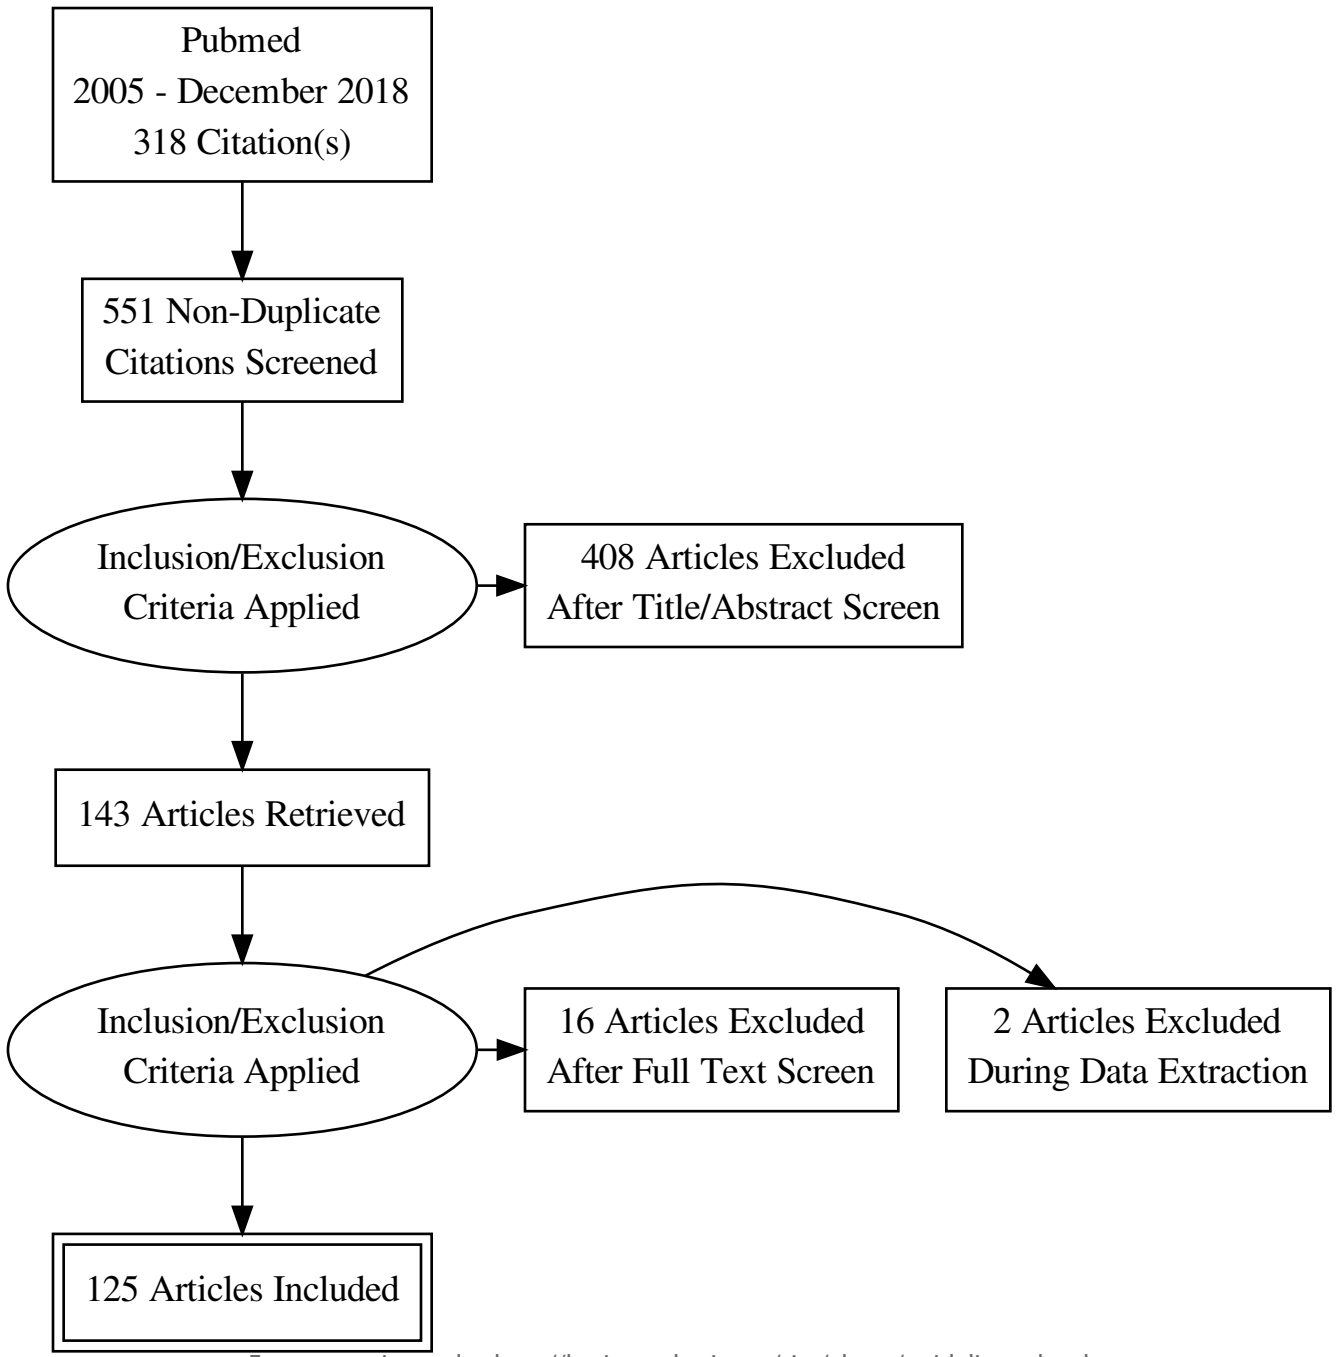

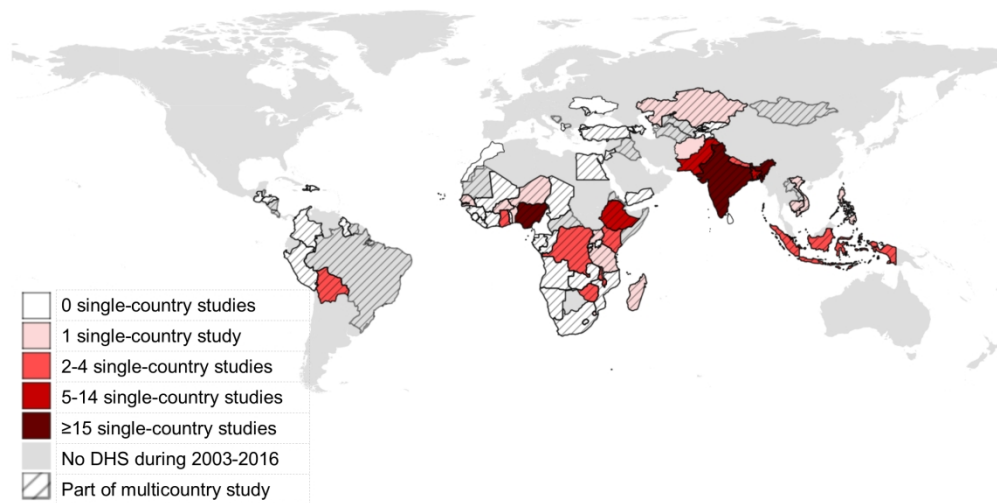

Map of countries by the number of published studies using Demographic and Health Survey (DHS) datasets. Shading corresponds to number of studies using DHS data from only one country; hash marks indicate a study using multiple countries.

190x101mm (300 x 300 DPI)

1  
2  
3  
4  
5  
6  
7  
8  
9  
10  
11  
12  
13  
14  
15  
16  
17  
18  
19  
20  
21  
22  
23  
24  
25  
26  
27  
28  
29  
30  
31  
32  
33  
34  
35  
36  
37  
38  
39  
40  
41  
42  
43  
44  
45  
46  
47  
48  
49  
50  
51  
52  
53  
54  
55  
56  
57  
58  
59  
60

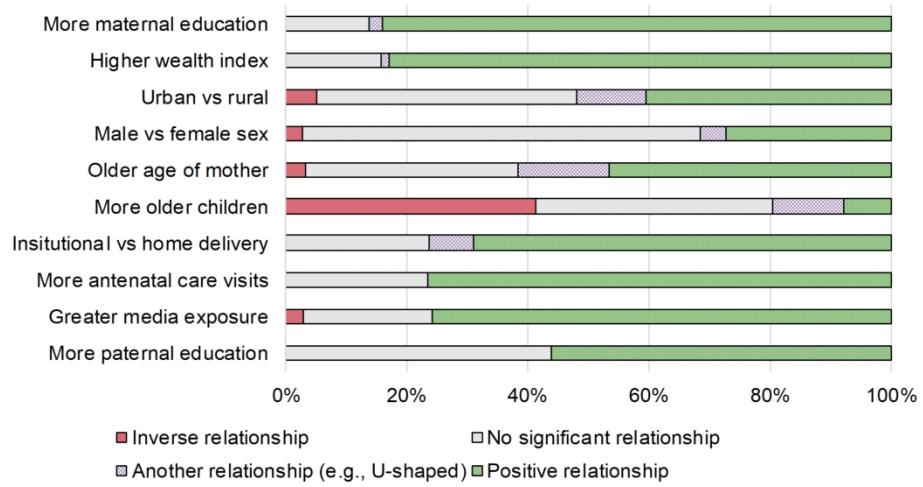

Commonly reported predictors of vaccination status used in studies using the Demographic and Health Survey.

190x101mm (300 x 300 DPI)

## Preferred Reporting Items for Systematic reviews and Meta-Analyses extension for Scoping Reviews (PRISMA-ScR) Checklist

| SECTION                                               | ITEM | PRISMA-ScR CHECKLIST ITEM                                                                                                                                                                                                                                                                                  | REPORTED ON PAGE # |
|-------------------------------------------------------|------|------------------------------------------------------------------------------------------------------------------------------------------------------------------------------------------------------------------------------------------------------------------------------------------------------------|--------------------|
| <b>TITLE</b>                                          |      |                                                                                                                                                                                                                                                                                                            |                    |
| Title                                                 | 1    | Identify the report as a scoping review.                                                                                                                                                                                                                                                                   | 1                  |
| <b>ABSTRACT</b>                                       |      |                                                                                                                                                                                                                                                                                                            |                    |
| Structured summary                                    | 2    | Provide a structured summary that includes (as applicable): background, objectives, eligibility criteria, sources of evidence, charting methods, results, and conclusions that relate to the review questions and objectives.                                                                              | 2                  |
| <b>INTRODUCTION</b>                                   |      |                                                                                                                                                                                                                                                                                                            |                    |
| Rationale                                             | 3    | Describe the rationale for the review in the context of what is already known. Explain why the review questions/objectives lend themselves to a scoping review approach.                                                                                                                                   | 3-4                |
| Objectives                                            | 4    | Provide an explicit statement of the questions and objectives being addressed with reference to their key elements (e.g., population or participants, concepts, and context) or other relevant key elements used to conceptualize the review questions and/or objectives.                                  | 4                  |
| <b>METHODS</b>                                        |      |                                                                                                                                                                                                                                                                                                            |                    |
| Protocol and registration                             | 5    | Indicate whether a review protocol exists; state if and where it can be accessed (e.g., a Web address); and if available, provide registration information, including the registration number.                                                                                                             | N/A, 4             |
| Eligibility criteria                                  | 6    | Specify characteristics of the sources of evidence used as eligibility criteria (e.g., years considered, language, and publication status), and provide a rationale.                                                                                                                                       | 4                  |
| Information sources*                                  | 7    | Describe all information sources in the search (e.g., databases with dates of coverage and contact with authors to identify additional sources), as well as the date the most recent search was executed.                                                                                                  | 4                  |
| Search                                                | 8    | Present the full electronic search strategy for at least 1 database, including any limits used, such that it could be repeated.                                                                                                                                                                            | 4                  |
| Selection of sources of evidence†                     | 9    | State the process for selecting sources of evidence (i.e., screening and eligibility) included in the scoping review.                                                                                                                                                                                      | 4-5                |
| Data charting process‡                                | 10   | Describe the methods of charting data from the included sources of evidence (e.g., calibrated forms or forms that have been tested by the team before their use, and whether data charting was done independently or in duplicate) and any processes for obtaining and confirming data from investigators. | 5                  |
| Data items                                            | 11   | List and define all variables for which data were sought and any assumptions and simplifications made.                                                                                                                                                                                                     | 5                  |
| Critical appraisal of individual sources of evidence§ | 12   | If done, provide a rationale for conducting a critical appraisal of included sources of evidence; describe the methods used and how this information was used in any data synthesis (if appropriate).                                                                                                      | 5                  |

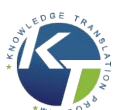

| SECTION                                       | ITEM | PRISMA-ScR CHECKLIST ITEM                                                                                                                                                                       | REPORTED ON PAGE # |
|-----------------------------------------------|------|-------------------------------------------------------------------------------------------------------------------------------------------------------------------------------------------------|--------------------|
| Synthesis of results                          | 13   | Describe the methods of handling and summarizing the data that were charted.                                                                                                                    | 6                  |
| <b>RESULTS</b>                                |      |                                                                                                                                                                                                 |                    |
| Selection of sources of evidence              | 14   | Give numbers of sources of evidence screened, assessed for eligibility, and included in the review, with reasons for exclusions at each stage, ideally using a flow diagram.                    | 7                  |
| Characteristics of sources of evidence        | 15   | For each source of evidence, present characteristics for which data were charted and provide the citations.                                                                                     | 7-8                |
| Critical appraisal within sources of evidence | 16   | If done, present data on critical appraisal of included sources of evidence (see item 12).                                                                                                      | 7                  |
| Results of individual sources of evidence     | 17   | For each included source of evidence, present the relevant data that were charted that relate to the review questions and objectives.                                                           | 7                  |
| Synthesis of results                          | 18   | Summarize and/or present the charting results as they relate to the review questions and objectives.                                                                                            | 7-8                |
| <b>DISCUSSION</b>                             |      |                                                                                                                                                                                                 |                    |
| Summary of evidence                           | 19   | Summarize the main results (including an overview of concepts, themes, and types of evidence available), link to the review questions and objectives, and consider the relevance to key groups. | 8                  |
| Limitations                                   | 20   | Discuss the limitations of the scoping review process.                                                                                                                                          | 10                 |
| Conclusions                                   | 21   | Provide a general interpretation of the results with respect to the review questions and objectives, as well as potential implications and/or next steps.                                       | 10                 |
| <b>FUNDING</b>                                |      |                                                                                                                                                                                                 |                    |
| Funding                                       | 22   | Describe sources of funding for the included sources of evidence, as well as sources of funding for the scoping review. Describe the role of the funders of the scoping review.                 | 12                 |

JBI = Joanna Briggs Institute; PRISMA-ScR = Preferred Reporting Items for Systematic reviews and Meta-Analyses extension for Scoping Reviews.

\* Where *sources of evidence* (see second footnote) are compiled from, such as bibliographic databases, social media platforms, and Web sites.

† A more inclusive/heterogeneous term used to account for the different types of evidence or data sources (e.g., quantitative and/or qualitative research, expert opinion, and policy documents) that may be eligible in a scoping review as opposed to only studies. This is not to be confused with *information sources* (see first footnote).

‡ The frameworks by Arksey and O'Malley (6) and Levac and colleagues (7) and the JBI guidance (4, 5) refer to the process of data extraction in a scoping review as data charting.

§ The process of systematically examining research evidence to assess its validity, results, and relevance before using it to inform a decision. This term is used for items 12 and 19 instead of "risk of bias" (which is more applicable to systematic reviews of interventions) to include and acknowledge the various sources of evidence that may be used in a scoping review (e.g., quantitative and/or qualitative research, expert opinion, and policy document).

From: Tricco AC, Lillie E, Zarin W, O'Brien KK, Colquhoun H, Levac D, et al. PRISMA Extension for Scoping Reviews (PRISMA-ScR): Checklist and Explanation. *Ann Intern Med.* 2018;169:467–473. doi: [10.7326/M18-0850](https://doi.org/10.7326/M18-0850).

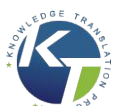

St. Michael's

Inspired Care.  
Inspiring Science.

For peer review only - <http://bmjopen.bmj.com/site/about/guidelines.xhtml>

# BMJ Open

## Vaccination Assessments using the Demographic and Health Survey, 2005-2018; A Scoping Review

|                                 |                                                                                                                                                                                                                                                                       |
|---------------------------------|-----------------------------------------------------------------------------------------------------------------------------------------------------------------------------------------------------------------------------------------------------------------------|
| Journal:                        | <i>BMJ Open</i>                                                                                                                                                                                                                                                       |
| Manuscript ID                   | bmjopen-2020-039693.R1                                                                                                                                                                                                                                                |
| Article Type:                   | Original research                                                                                                                                                                                                                                                     |
| Date Submitted by the Author:   | 02-Nov-2020                                                                                                                                                                                                                                                           |
| Complete List of Authors:       | Shenton, Luke; University of Michigan, Epidemiology<br>Wagner, Abram; University of Michigan, Epidemiology<br>Ji, Mengdi; University of Michigan, Epidemiology<br>Carlson, Bradley; University of Michigan, Epidemiology<br>Boulton, Matthew; University of Michigan, |
| <b>Primary Subject Heading</b>: | Global health                                                                                                                                                                                                                                                         |
| Secondary Subject Heading:      | Public health                                                                                                                                                                                                                                                         |
| Keywords:                       | Paediatric infectious disease & immunisation < PAEDIATRICALS, Public health < INFECTIOUS DISEASES, International health services < HEALTH SERVICES ADMINISTRATION & MANAGEMENT                                                                                        |
|                                 |                                                                                                                                                                                                                                                                       |

SCHOLARONE™  
Manuscripts

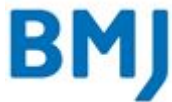

I, the Submitting Author has the right to grant and does grant on behalf of all authors of the Work (as defined in the below author licence), an exclusive licence and/or a non-exclusive licence for contributions from authors who are: i) UK Crown employees; ii) where BMJ has agreed a CC-BY licence shall apply, and/or iii) in accordance with the terms applicable for US Federal Government officers or employees acting as part of their official duties; on a worldwide, perpetual, irrevocable, royalty-free basis to BMJ Publishing Group Ltd ("BMJ") its licensees and where the relevant Journal is co-owned by BMJ to the co-owners of the Journal, to publish the Work in this journal and any other BMJ products and to exploit all rights, as set out in our [licence](#).

The Submitting Author accepts and understands that any supply made under these terms is made by BMJ to the Submitting Author unless you are acting as an employee on behalf of your employer or a postgraduate student of an affiliated institution which is paying any applicable article publishing charge ("APC") for Open Access articles. Where the Submitting Author wishes to make the Work available on an Open Access basis (and intends to pay the relevant APC), the terms of reuse of such Open Access shall be governed by a Creative Commons licence – details of these licences and which [Creative Commons](#) licence will apply to this Work are set out in our licence referred to above.

Other than as permitted in any relevant BMJ Author's Self Archiving Policies, I confirm this Work has not been accepted for publication elsewhere, is not being considered for publication elsewhere and does not duplicate material already published. I confirm all authors consent to publication of this Work and authorise the granting of this licence.

1  
2  
3  
4  
5  
6  
7  
8  
9  
10  
11  
12  
13  
14  
15  
16  
17  
18  
19  
20  
21  
22  
23  
24  
25  
26  
27  
28  
29  
30  
31  
32  
33  
34  
35  
36  
37  
38  
39  
40  
41  
42  
43  
44  
45  
46  
47  
48  
49  
50  
51  
52  
53  
54  
55  
56  
57  
58  
59  
60

1 **Vaccination Assessments using the Demographic and Health Survey, 2005-2018; A Scoping**  
2 **Review**

3  
4 Luke M. Shenton ([lshenton@umich.edu](mailto:lshenton@umich.edu)) <sup>1,\*</sup>

5 Abram L. Wagner ([awag@umich.edu](mailto:awag@umich.edu)) <sup>1,\*,†</sup>

6 Mengdi Ji ([mengdiji@umich.edu](mailto:mengdiji@umich.edu)) <sup>1</sup>

7 Bradley F. Carlson ([bcarlson@umich.edu](mailto:bcarlson@umich.edu)) <sup>1</sup>

8 Matthew L. Boulton ([mboulton@umich.edu](mailto:mboulton@umich.edu)) <sup>1,2</sup>

9  
10  
11 <sup>1</sup>Department of Epidemiology, School of Public Health, University of Michigan, 1415  
12 Washington Heights, Ann Arbor, MI 48109, USA

13  
14 <sup>2</sup>Department of Internal Medicine, Division of Infectious Disease, University of Michigan  
15 Medical School, 1500 East Medical Center Drive, Ann Arbor, MI 48109, USA

16  
17 \* Equal contributors

18  
19 † **Address correspondence to:**

20 Abram L. Wagner, 1415 Washington Heights, Ann Arbor, MI 48109, USA [[awag@umich.edu](mailto:awag@umich.edu)]

21 TEL: +001-734-763-2330 FAX: +001-734- 647-1120

22  
23  
24 **Running Head:** Scoping review of vaccination assessments

25  
26  
27 **Word Count:** 3,608    **Abstract:** 279



1  
2  
3 32 **ABSTRACT**  
4 33

5  
6 34 **Objective:** To characterize studies which have used DHS datasets to evaluate vaccination  
7 35 status.  
8 36

9 37 **Design:** Scoping review  
10 38

11 39 **Data sources:** Electronic databases including PubMed, EBSCOhost, and POPLINE, from 2005-  
12 40 2018  
13 41

14 42 **Study selection:** All English studies with vaccination status as the outcome and the use of  
15 43 Demographic and Health Survey (DHS) data.  
16 44

17 45 **Data extraction:** Studies were selected using a predetermined list of eligibility criteria and data  
18 46 was extracted independently by two authors. Data related to the study population, the outcome  
19 47 of interest (vaccination), and commonly seen predictors were extracted.  
20 48

21 49 **Results:** A total of 125 articles were identified for inclusion in the review. The number of  
22 50 countries covered by individual studies varied widely (1 to 86), with the most published papers  
23 51 using data from India, Nigeria, Pakistan, and Ethiopia. Many different definitions of full  
24 52 vaccination were utilized although the majority used a traditional schedule recommended in  
25 53 the WHO's Expanded Program on Immunization. We found studies analyzed a wide variety of  
26 54 predictors, but the most common were maternal education, wealth, urbanicity, and child's sex.  
27 55 Most commonly reported predictors had consistent relationships with the vaccination outcome,  
28 56 outside of sibling composition.  
29 57

30 58 **Conclusions:** Researchers make frequent use of the DHS dataset to describe vaccination  
31 59 patterns within one or more countries. A clearer idea of past use of DHS can inform the  
32 60 development of more rigorous studies in the future. Researchers should carefully consider  
33 61 whether a variable needs to be included in the multivariable model, or if there are mediating  
34 62 relationships across predictor variables.  
35 63

36 64 **Keywords:** vaccine-preventable diseases; developing countries; immunization programs;  
37 65 surveys and questionnaires  
38 66  
39 67

40 68 This is an Open Access article distributed in accordance with the Creative Commons  
41 69 Attribution Non Commercial (CC BY-NC 4.0) license, which permits others to distribute, remix,  
42 70 adapt, build upon this work non-commercially, and license their derivative works on different  
43 71 terms, provided the original work is properly cited and the use is non-commercial. See:  
44 72 <http://creativecommons.org/licenses/by-nc/4.0/>  
45  
46  
47  
48  
49  
50  
51  
52  
53  
54  
55  
56  
57  
58  
59  
60

1  
2  
3 73 **Strengths and limitations**

- 4 74 - The Demographic and Health Surveys (DHS) are some of the most used sources of  
5 national-level vaccination data  
6 75  
7 76 - Most DHS studies find consistent relationships between sociodemographic variables  
8 and vaccination outcomes.  
9 77  
10 78 - There are large variations in how often a country's DHS dataset is used.  
11 79 - A limitation is the use only of English language material.  
12 80 - Studies using other national-level vaccination surveys were not included.  
13  
14  
15  
16  
17  
18  
19  
20  
21  
22  
23  
24  
25  
26  
27  
28  
29  
30  
31  
32  
33  
34  
35  
36  
37  
38  
39  
40  
41  
42  
43  
44  
45  
46  
47  
48  
49  
50  
51  
52  
53  
54  
55  
56  
57  
58  
59  
60

## 81 INTRODUCTION

82  
83 Vaccinations have been a cost-effective method to control and achieve elimination and  
84 eradication of common and sometimes deadly infectious diseases [1]. The introduction of  
85 routine vaccinations in the United States, for example, has led to a >90% decline in cases of  
86 diphtheria, measles, mumps, pertussis, polio, rubella, smallpox, and tetanus since the  
87 prevaccine era [2]. Nevertheless, every year, more than 2.7 million individuals die from acute  
88 illnesses caused by common vaccine-preventable diseases [3]. The overwhelming majority of  
89 vaccine-preventable deaths among children <5 years occur in low- and middle-income countries  
90 [4].

91  
92 Based on the prevalence and severity of disease and on the availability of a safe and effective  
93 vaccine, the World Health Organization (WHO) recommends that countries include nine  
94 vaccines on their publicly funded vaccine schedule for young children [5]. Referred to as the  
95 Expanded Program on Immunization (EPI), the schedule initially recommended vaccination  
96 with *Bacillus Calmette-Guérin* (BCG), diphtheria-tetanus-pertussis vaccine (DTP), polio vaccine,  
97 and a measles-containing vaccine (MCV). Since 2004, five additional pediatric vaccines have  
98 been added to the WHO EPI: hepatitis B vaccine (HepB), *Haemophilus influenzae* type b vaccine  
99 (Hib), rubella vaccine, pneumococcal conjugate vaccine (PCV), and rotavirus vaccine.

100 Individual countries decide which vaccines to publicly fund and also to make available on the  
101 private market resulting in wide variation globally in the adoption of these vaccines. For  
102 example, in 2015, 194 countries included 3 doses of DTP and polio in their immunization  
103 schedule whereas only 84 included rotavirus [6]. Many countries now use a pentavalent  
104 vaccine, which includes DTP, HepB, and Hib vaccines in one vial. Substantial efforts on the part  
105 of Gavi The Vaccine Alliance and other international agencies are devoted to logistically and  
106 financially supporting the introduction of new and underused vaccines [7]. These efforts are  
107 particularly important because a discouragingly high number of children consistently do not  
108 receive some or all of the vaccines that were first recommended by the WHO. According to the  
109 WHO, 19.4 million children have not received three doses of DTP, with a majority (11.7 million)  
110 living in just 10 countries: Nigeria, India, Pakistan, Indonesia, Ethiopia, Philippines, the  
111 Democratic Republic of the Congo, Brazil, Angola, and Vietnam [8]. With the exception of  
112 Brazil, all of these countries have vaccination coverage regularly assessed as part of the  
113 Demographic and Health Survey (DHS) program.

114  
115 Nationally representative surveys, like those of the DHS program, have been essential to  
116 evaluating country- and region-specific vaccination programs over time. DHS programs are  
117 funded and facilitated by the US Agency for International Development (USAID). The DHS  
118 program was launched in 1984 with a goal of advancing global understanding of health and  
119 population trends in developing countries. Since its inception it has provided technical  
120 assistance for over 300 surveys in 93 developing countries across the globe. Today, the program  
121 is known for collecting and disseminating accurate, nationally representative data on a variety  
122 of topics including fertility, family planning, maternal and child health, gender, HIV/AIDS,  
123 malaria, and nutrition. Host countries have ownership of data collection, analysis, presentation,

1  
2  
3 124 and use and the data is designed to ultimately be used in policy formation, program planning,  
4 125 and monitoring and evaluation [9].  
5  
6 126

7 127 A large number of prior studies have amalgamated data from several different DHS datasets, or  
8 128 have included data from many countries, but none has systematically evaluated how these past  
9 129 studies have actually used the vaccination data provided by DHS [10–12]. Given that DHS has  
10 130 had widespread use over several decades in evaluating vaccination programs through  
11 131 identification of under-vaccinated groups, and characterizing systematic barriers to vaccination,  
12 132 a clearer idea of past use of DHS can inform the development of more rigorous studies in the  
13 133 future. The purpose of this scoping review was to characterize studies which have used DHS  
14 134 datasets to evaluate childhood vaccination status. Specifically we report on the global  
15 135 distribution of studies, list the predictors used in multivariable regression models, and examine  
16 136 the different definitions of “full vaccination” across studies and how these relate to the WHO  
17 137 EPI recommendations.  
18  
19 138

## 20 139 **METHODS**

21 140  
22 141 This scoping review was completed by following the steps outlined by the Preferred Reporting  
23 142 Items of Systematic Reviews and Meta-Analyses Extension for Scoping Reviews (PRISMA-ScR)  
24 143 [13].  
25  
26 144

### 27 145 **Search Strategies**

28 146 Searches were performed in 3 different electronic databases: PubMed/MEDLINE, PopLine, and  
29 147 EBSCOhost’s Africa-Wide Information, Global Health, Global Health Archives, and Health  
30 148 Policy Reference Center databases. The search terms used were; “Vaccine” (and its variations  
31 149 such as vaccination and vaccinate), “Immunization” (and its variations such as immunize),  
32 150 “demographic and health surveys”, “demographic and health survey”, “DHS”, “National  
33 151 Family Health Survey”, and “NFHS”. Within PubMed the exact search was the following:  
34  
35 152

36 153 ("demographic and health surveys" OR "demographic and health survey" OR "DHS" OR  
37 154 "National Family Health Survey" OR "NFHS") AND (immuniz\* OR Vaccin\*) AND  
38 155 ("2000/01/01"[PDAT] : "3000/12/31"[PDAT])  
39  
40 156

41 157 In addition, the searches were limited to only return papers published between 1 January 2005  
42 158 and 31 December 2018. References from articles found to be relevant were searched in order to  
43 159 identify additional articles.  
44  
45 160

### 46 161 **Eligibility Criteria**

47 162 The titles of all papers returned through use of the search terms were initially screened for  
48 163 relevance. The abstracts of all remaining papers were then accessed with specific inclusion and  
49 164 exclusion criteria in mind. Abstracts and manuscripts were included if they met all inclusion  
50 165 criteria: (1) studies were conducted using DHS data from low or middle-income countries; (2)  
51 166 studies looked at routine vaccination coverage as the primary outcome; (3) studies were cross-  
52  
53  
54  
55  
56  
57  
58  
59  
60

167 sectional in design; (4) studies used either the Demographic and Health Survey (DHS) or the  
168 National Family Health Survey (NFHS), a similar study conducted only in India; (5) studies  
169 looked specifically at the vaccination outcome of children (usually aged between 0 and 60  
170 months). A set of exclusion criteria was also created: (1) studies published before 2005 or after  
171 2018 (though studies with an online publication in 2018 but print publication in 2019 were  
172 included); (2) studies that looked only at the vaccination outcome of adults; (3) studies that  
173 looked at population in high income countries; (4) studies that used modeling or projections  
174 instead of just analyzing the data provided; or (5) systematic reviews.

175

### 176 **Study Selection**

177 LS removed all duplicates and assessed all titles for relevance. Then three reviewers  
178 (LS/BC/AW) independently assessed all abstracts and full-text publications for eligibility using  
179 the eligibility criteria laid out. All disagreements were resolved by discussion between  
180 reviewers.

181

### 182 **Data extraction**

183 In addition to assessment for relevance, data was also extracted independently by three  
184 reviewers (LS/BC/AW). A data extraction form was designed using Google Sheets and was  
185 piloted before beginning data extraction. Data from 3 main categories was gathered during data  
186 extraction. The first area was the study population, including the countries of interest, the  
187 subpopulation of children being examined, years of the survey administration, and whether any  
188 surveys besides DHS or NFHS were used. The second category was the outcome of interests:  
189 which individual vaccines were assessed, whether full or under vaccination was examined, and  
190 if full or under vaccination was examined how were they defined. Lastly, data on vaccination  
191 predictors was gathered. We tabulated whether a given study included the most common  
192 predictors found in a previous systematic review of vaccination timeliness [14]: maternal  
193 education, wealth index, urbanicity, sex of child, age of mother, birth order, birth delivery  
194 location, number of antenatal care (ANC) visits, media exposure, and paternal education.

195

### 196 **Study Methodological quality evaluation**

197 We modified the Downs and Black checklist [15] for assessing biases in systematic reviews  
198 because all eligible studies used a similar data source. The checklist included the following  
199 criteria:

200

#### 201 **Introduction / Study population**

- 202 A. Is the hypothesis/aim/objective of the study clearly described? (1=Yes, 0=No)
- 203 B. Are the main outcomes (including defining full vaccination, if applicable) to be  
204 measured clearly described in the introduction or methods? (1=Yes, 0=No)
- 205 C. Are the characteristics of study population eligibility criteria (including age range)  
206 clearly described? (1=Yes, 0=No)

#### 207 **Descriptive Statistics**

- 208 D. Does the paper use weighting and clustering? (1=Yes, 0=No)

209

210

211

212

213

214

215

- 1  
2  
3 209 E. Does the paper provide estimates of random variability (e.g., 95% confidence interval of  
4 210 weighted estimates or standard errors) for the main outcomes? (1=Yes, 0=No)  
5

6 211 **Analytical Statistics**

- 7 212 F. Does the paper use do a multivariable analysis? (1=Yes, 0=No)  
8 213 G. Does the paper show distribution of confounders / covariates? (1=Yes, 0=No)  
9 214 H. Does the paper describe how the researchers arrived at the final list of confounders? (2=*a*  
10 215 *priori* knowledge or used directed acyclic graph (DAG), 1=used P-values from crude  
11 216 analysis or used stepwise technique, 0=did not describe or did not use multivariable  
12 217 analysis)  
13 218 I. Does the paper write out P-values under 0.05? (1= Yes, or provided 95% confidence  
14 219 intervals, 0=No)  
15  
16 220

17  
18 221 The quality score could range from 0-10, and we describe the average values with a mean and  
19 222 median quality score among all studies.  
20  
21 223

22 224 **Synthesis of study findings**

23 225 Given the heterogeneity of outcomes, predictors, and study populations of the included studies  
24 226 it was not possible to combine the results into a meta-analysis. Instead, we present a narrative  
25 227 summary of the data. We describe the distribution of studies by population, what predictor  
26 228 variables are used (and what direction of association they have with outcome), and how full  
27 229 vaccination is defined. In the discussion, we provide recommendations for future analyses of  
28 230 DHS data.  
29 231

30  
31 232 A choropleth map was created using freely available shapefiles from Natural Earth [16] in QGIS  
32 233 3.6 (QGIS Development Team). The map shows how many studies using data from only one  
33 234 country were published by country. We also show if a country's data was part of a multicountry  
34 235 study, and we identify countries which had a standard DHS dataset administered between 2003  
35 236 and 2016 but which did not have a published study. The years 2003-2016 were chosen as a lag  
36 237 time of 2 years compared to the scoping review inclusion criteria to account for delays in  
37 238 publishing the data and writing up a manuscript.  
38 239

39 240 **Patient and public involvement**

40  
41 241 This research was done without public involvement. Members of the public were not invited to  
42 242 comment on the study design and were not consulted, nor were they invited to contribute to  
43 243 this document to improve accessibility.  
44 244  
45  
46  
47  
48  
49  
50  
51  
52  
53  
54  
55  
56  
57  
58  
59  
60

245 Table 1. List of papers included in a scoping review of studies assessing vaccination status using the Demographic and Health Survey (DHS).  
246

| Author          | Year | Countries    | Age of Child                       | Vaccination Outcome                                     | Quality score |
|-----------------|------|--------------|------------------------------------|---------------------------------------------------------|---------------|
| Bowie [17]      | 2006 | Malawi       | 12-23 months                       | BCG, OPV, DTP, MCV, Full (BCG + 3OPV + 3DTP + MCV)      | 4             |
| Choi [18]       | 2006 | India        | 12-48 months                       | Full (BCG + 3OPV + 3DTP + MCV)                          | 6             |
| Gaudin [19]     | 2006 | India        | 12-23 months                       | Full (BCG + 3OPV + 3DTP + MCV)                          | 3             |
| Akmatov [20]    | 2007 | Kazakhstan   | 12-60 months                       | Full (BCG + 4OPV + 3DTP + MCV)                          | 8             |
| Anand [21]      | 2007 | Multicountry | Not specified                      | OPV, DTP, MCV                                           | 3             |
| Bhandari [22]   | 2007 | Nepal        | 12-23 months                       | BCG, OPV, DTP, MCV, Full (BCG + 3OPV + 3DTP + MCV)      | 5             |
| Datar [23]      | 2007 | India        | 2-35 months                        | OPV, Full (BCG + 3OPV + 3DTP + MCV)                     | 5             |
| Minh Thang [24] | 2007 | Vietnam      | 11-23 months                       | Full (BCG + 3OPV + 3DTP + MCV)                          | 5             |
| Munthali [25]   | 2007 | Malawi       | 12-23 months                       | Full (BCG + 3OPV + 3DTP + MCV)                          | 3             |
| Ntenda [26]     | 2007 | Malawi       | 12-23 months                       | BCG, OPV, DTP, MCV, Full (BCG + 3DTP + 3OPV + 1MCV)     | 6             |
| Chidiebere [27] | 2008 | Nigeria      | 0-23 months                        | Full (BCG + 4OPV + 3Penta + 1 MCV + YF)                 | 7             |
| Gatchell [28]   | 2008 | India        | 1-3 years                          | Full (BCG + 3OPV + 3DTP + MCV)                          | 4             |
| Halder [29]     | 2008 | Bangladesh   | 12-23 months                       | Full (BCG + 3OPV + 3DTP + MCV)                          | 6             |
| Meheus [30]     | 2008 | Multicountry | 12-23 months                       | MCV                                                     | 4             |
| Patra [31]      | 2008 | India        | 12-23 months                       | Full (BCG + 3OPV + 3DTP + MCV)                          | 6             |
| Antai [32]      | 2009 | Nigeria      | Older than 12 months               | Full (BCG + 3OPV + 3DTP + MCV)                          | 7             |
| Antai [33]      | 2009 | Nigeria      | Older than 12 months               | Full (BCG + 3OPV + 3DTP + MCV)                          | 8             |
| Bondy [34]      | 2009 | Philippines  | 12-23 months                       | Full (BCG + 3OPV + 3DTP + MCV)                          | 5             |
| Corsi [35]      | 2009 | India        | Under 5 years                      | BCG, OPV, DTP, MCV, Full (age dependent after 9 months) | 3             |
| Osaki [36]      | 2009 | Indonesia    | 12-23 months                       | Full (BCG + 3OPV + 3DTP + MCV)                          | 3             |
| Sia [37]        | 2009 | Burkina Faso | 12-23 months                       | Full (BCG + 3OPV + 3DTP + MCV + YF)                     | 6             |
| Antai [38]      | 2010 | Nigeria      | 12 months and older                | BCG, OPV, DTP, MCV, Full (BCG + 3OPV + 3DTP + MCV)      | 8             |
| Hong [39]       | 2010 | Cambodia     | 12-59 months                       | DTP                                                     | 8             |
| Rahman [40]     | 2010 | Bangladesh   | 12-59 months                       | Full (BCG + 3OPV + 3DTP + MCV)                          | 6             |
| Sahu [41]       | 2010 | India        | Preceding 2 births in last 3 years | Full (BCG + 3OPV + 3DTP + MCV)                          | 5             |
| Semali [42]     | 2010 | Tanzania     | 12-23 months                       | Full (BCG + 4OPV + 3DTP + MCV)                          | 6             |
| Abuya [43]      | 2011 | Kenya        | 12-35 months                       | Full (BCG + 3OPV + 3DTP + MCV)                          | 6             |
| Antai [44]      | 2011 | Nigeria      | 12 months and older                | Full (BCG + 3OPV + 3DTP + MCV)                          | 6             |
| Fernandez [45]  | 2011 | Indonesia    | 0-59 months                        | BCG, OPV, DTP, MCV, HepB                                | 9             |
| Fernandez [46]  | 2011 | Indonesia    | 0-59 months                        | MCV                                                     | 8             |

|    |                   |      |              |                                |                                                       |   |
|----|-------------------|------|--------------|--------------------------------|-------------------------------------------------------|---|
| 1  | Kumar [47]        | 2011 | India        | 12-23 months                   | Full (BCG + 3OPV + 3DTP + MCV)                        | 5 |
| 2  | Lauridsen [48]    | 2011 | India        | 12-23 months                   | Full (BCG + 3OPV + 3DTP + MCV)                        | 5 |
| 3  | Pandey [49]       | 2011 | Nepal        | 12-23 months                   | BCG, OPV, DTP, MCV, Full (BCG + 3OPV + 3DTP + MCV)    | 7 |
| 4  | Singh [50]        | 2011 | India        | 12-48 months                   | Full (BCG + 3OPV + 3DTP + MCV)                        | 8 |
| 5  | Afzal [51]        | 2012 | Bangladesh   | Under 5 years                  | Full (BCG + 3OPV + 3DTP + MCV)                        | 5 |
| 6  | Antai [52]        | 2012 | Nigeria      | 12-59 months                   | Full (BCG + 3OPV + 3DTP + MCV)                        | 6 |
| 7  | Rammohan [53]     | 2012 | Multicountry | Not specified                  | MCV                                                   | 5 |
| 8  | Sabarwal [54]     | 2012 | India        | 12-24 months                   | Full (BCG + 3OPV + 3DTP + MCV)                        | 7 |
| 9  | Singh [55]        | 2012 | India        | 12-59 months                   | Full (BCG + 3OPV + 3DTP + MCV)                        | 5 |
| 10 | Wiysonge [56]     | 2012 | Multicountry | 12-23 months                   | Full (DTP3)                                           | 6 |
| 11 | Barman [57]       | 2013 | India        | 12-23 months                   | Full (BCG + 3OPV + 3DTP + MCV)                        | 6 |
| 12 | Bbaale [58]       | 2013 | Uganda       | 0-36 months (12 - 36 for full) | BCG, OPV, DTP, MCV, Full (BCG + 3OPV + 3DTP + MCV)    | 8 |
| 13 | Haque [59]        | 2013 | Bangladesh   | 9-59 months                    | MCV                                                   | 8 |
| 14 | Kumar [60]        | 2013 | India        | 0-59 months                    | Full (BCG + 3OPV + 3DTP + MCV)                        | 5 |
| 15 | Moyer [61]        | 2013 | Ethiopia     | 12-24 months                   | BCG, OPV, DTP, MCV, Full (BCG + 3Penta + 4OPV + 1MCV) | 6 |
| 16 | Singh [62]        | 2013 | India        | 12-23 months                   | Full (BCG + 3OPV + 3DTP + MCV)                        | 8 |
| 17 | Singh [63]        | 2013 | Nigeria      | 12-23 months                   | Full (BCG + 3OPV + 3DTP + MCV)                        | 7 |
| 18 | Singh [64]        | 2013 | India        | 12-23 months                   | Full (BCG + 3OPV + 3DTP + MCV)                        | 7 |
| 19 | Van Malderen [65] | 2013 | Kenya        | 12-23 months                   | MCV                                                   | 6 |
| 20 | Adegboye [66]     | 2014 | Nigeria      | 12-59 months                   | Full (BCG + 3OPV + 3DTP + MCV)                        | 6 |
| 21 | Bonfrer [67]      | 2014 | Burundi      | Older than 1 year              | BCG, OPV, DTP, MCV                                    | 7 |
| 22 | Bugvi [68]        | 2014 | Pakistan     | 12-23 months                   | Full (BCG + 3DTP + 4OPV + 3HepB + 1MCV)               | 9 |
| 23 | Canavan [69]      | 2014 | Multicountry | 12-23 months                   | Full (BCG + 4OPV + 1 MCV + 3Penta)                    | 9 |
| 24 | Clouston [70]     | 2014 | Madagascar   | 0-59 months                    | BCG, OPV, DTP, MCV, Hib                               | 7 |
| 25 | Ebot [71]         | 2014 | Ethiopia     | 12-30 months                   | Full (BCG + 3OPV + 3DTP + MCV)                        | 6 |
| 26 | Grundy [72]       | 2014 | Multicountry | Not specified                  | DTP                                                   | 3 |
| 27 | Heaton [73]       | 2014 | Bolivia      | Not specified                  | Full (BCG + 3OPV + 3DTP + MCV)                        | 4 |
| 28 | Helleringer [74]  | 2014 | Multicountry | 12-23 months                   | OPV, SIA participation                                | 4 |
| 29 | Javed [75]        | 2014 | Pakistan     | 12-28 months                   | BCG, OPV, DTP, MCV, Full (BCG + 3OPV + 3DTP + MCV)    | 8 |
| 30 | Luqman [76]       | 2014 | Nigeria      | 12-23 months                   | BCG, OPV, DTP, MCV, Full (BCG + 4OPV + 3DTP + MCV)    | 6 |
| 31 | Malhotra [77]     | 2014 | India        | Older than 12 months           | Full (BCG + 3OPV + 3DTP + MCV)                        | 7 |
| 32 | Neupane [78]      | 2014 | Nepal        | Not specified                  | Full (BCG + 1DTP + 1OPV)                              | 8 |
| 33 | Prusty [79]       | 2014 | India        | 12-23 months                   | Full (BCG + 3OPV + 3DTP + MCV)                        | 7 |
| 34 | Rai [80]          | 2014 | Niger        | 12-59 months                   | Full (BCG + 3OPV + 3DTP + MCV)                        | 7 |



|    |                      |      |              |                      |                                                       |   |
|----|----------------------|------|--------------|----------------------|-------------------------------------------------------|---|
| 1  | Singh [81]           | 2014 | Multicountry | 12-23 months         | Full (BCG + 3OPV + 3DTP + MCV)                        | 5 |
| 2  | Singh [82]           | 2014 | India        | 12-36 months         | Full (BCG + 3OPV + 3DTP + MCV)                        | 8 |
| 3  | Ushie [83]           | 2014 | Nigeria      | Under 5 years        | Full (BCG + 3OPV + 3DTP + MCV)                        | 7 |
| 4  | Wagner [84]          | 2014 | Multicountry | 0-59 months          | BCG                                                   | 8 |
| 5  | Zaidi [85]           | 2014 | Pakistan     | 0-5 years            | OPV, DTP, MCV                                         | 9 |
| 6  | Abadura [86]         | 2015 | Ethiopia     | 12-59 months         | Full (BCG + 3OPV + 3DTP + MCV)                        | 8 |
| 7  | Ebot [87]            | 2015 | Ethiopia     | 12-30 months         | Full (BCG + 3OPV + 3DTP + MCV)                        | 7 |
| 8  | Hajizadeh [88]       | 2015 | Multicountry | Under 59 months      | BCG, OPV, DTP                                         | 8 |
| 9  | Lakew [89]           | 2015 | Ethiopia     | 12-23 months         | Full (BCG + 3OPV + 3DTP + MCV)                        | 8 |
| 10 | McGlynn [90]         | 2015 | Ghana        | 12-23 months         | Full (BCG + 3OPV + 3DTP + MCV)                        | 9 |
| 11 | Mukungwa [91]        | 2015 | Zimbabwe     | 12-23 months         | Full (BCG + 3OPV + 3DTP + MCV)                        | 7 |
| 12 | Onsomu [92]          | 2015 | Kenya        | 12-23 months         | BCG, OPV, DTP, MCV                                    | 8 |
| 13 | Osetinsky [93]       | 2015 | Bolivia      | 24 months - 5 years  | Full (BCG + 3 Polio + 3DTP + 1MMR + YF)               | 6 |
| 14 | Prusty [94]          | 2015 | India        | 12-23 months         | Full (BCG + 3OPV + 3DTP + MCV)                        | 6 |
| 15 | Rossi [95]           | 2015 | Zimbabwe     | 12-23 months         | Full (BCG + 3OPV + 3DTP + MCV)                        | 9 |
| 16 | Schweitzer [96]      | 2015 | Multicountry | 12-59 months         | DTP, MCV                                              | 6 |
| 17 | Shrivastwa [97]      | 2015 | India        | 12-36 months         | Full (BCG + 3OPV + 3DTP + MCV)                        | 7 |
| 18 | Singh [98]           | 2015 | Multicountry | 12-23 months         | Full (BCG + 3OPV + 3DTP + MCV)                        | 7 |
| 19 | Smith-Greenaway [99] | 2015 | Benin        | 1-59 months          | Ever received any vaccine                             | 6 |
| 20 | Tsawe [100]          | 2015 | eSwatini     | Not specified        | Ever received any vaccine                             | 9 |
| 21 | Arsenault [101]      | 2016 | Multicountry | 12-23 months         | DTP, MCV                                              | 5 |
| 22 | Chima [102]          | 2016 | Nigeria      | 12-59 months         | BCG, OPV, DTP, MCV                                    | 6 |
| 23 | Gurmu [103]          | 2016 | Ethiopia     | 12-23 months         | Full (BCG + 3OPV + 3DTP + MCV)                        | 6 |
| 24 | Hosseinpour [104]    | 2016 | Multicountry | 12-23 months in most | DTP                                                   | 5 |
| 25 | Kriss [105]          | 2016 | Zimbabwe     | 12-23 months         | BCG, OPV, DTP, MCV, Full (BCG + 3OPV + 3Penta + 1MCV) | 9 |
| 26 | Kumar [106]          | 2016 | India        | 12-23 months         | Full (BCG + 3DTP + 3OPV + 1MCV)                       | 9 |
| 27 | Restrepo-Méndez [11] | 2016 | Multicountry | 12-23 months in most | Full (BCG + 3DTP + 3OPV + 1MCV)                       | 6 |
| 28 | Restrepo-Méndez [12] | 2016 | Multicountry | 12-23 months         | BCG, OPV, DTP, MCV, Full (BCG + 3DTP + 3OPV + 1MCV)   | 4 |
| 29 | Schweitzer [107]     | 2016 | Multicountry | Birth - 250 weeks    | DTP                                                   | 5 |
| 30 | Adedokun [108]       | 2017 | Nigeria      | 12-23 months         | Full (BCG + 3OPV + 3Penta + MCV)                      | 7 |
| 31 | Aghaji [109]         | 2017 | Nigeria      | 12-23 months         | MCV                                                   | 4 |

|    |                   |      |              |               |                                                          |    |
|----|-------------------|------|--------------|---------------|----------------------------------------------------------|----|
| 1  | Ambel [110]       | 2017 | Ethiopia     | 12-23 months  | MCV, Full (BCG + 3DTP + 3OPV + 1MCV)                     | 4  |
| 2  | Arsenault [10]    | 2017 | Multicountry | 12-23 months  | DTP, MCV                                                 | 8  |
| 3  | Delprato [111]    | 2017 | Multicountry | Not specified | Full (BCG + DTP + OPV + MCV (no. unspecified))           | 5  |
| 4  | Herliana [112]    | 2017 | Indonesia    | 12-59 months  | Full (BCG + 3DTP + 4OPV + 1MCV + 1HepB                   | 9  |
| 5  | Kazungu [113]     | 2017 | Multicountry | 12-23 months  | Full (BCG + 3DTP + 3OPV + 1MCV)                          | 7  |
| 6  | KC [114]          | 2017 | Nepal        | Not specified | BCG, OPV, DTP, MCV, Full (BCG + 3DTP + 3OPV + 1MCV)      | 6  |
| 7  | Khan [115]        | 2017 | Pakistan     | Under 5 years | OPV                                                      | 7  |
| 8  | Mbengue [116]     | 2017 | Senegal      | 12-23 months  | Full (BCG + 3Penta + 3OPV + 1MCV)                        | 8  |
| 9  | Oleribe [117]     | 2017 | Nigeria      | 12-24 months  | BCG, OPV, DTP, MCV, Full (BCG + 3DTP + 3OPV dose + 1MCV) | 5  |
| 10 | Singh [118]       | 2017 | India        | 12-13 months  | Full (Not defined)                                       | 6  |
| 11 | Uthman [119]      | 2017 | Nigeria      | 12-23 months  | OPV                                                      | 9  |
| 12 | Zuhair [120]      | 2017 | India        | Not specified | BCG, OPV, DTP, MCV                                       | 7  |
| 13 | Acharya [121]     | 2018 | DRC          | 12-23 months  | Full (BCG +3DTP + 3OPV + 1MCV)                           | 9  |
| 14 | Adetokunboh [122] | 2018 | Multicountry | 12-23 months  | DTP                                                      | 6  |
| 15 | Adetokunboh [123] | 2018 | Multicountry | 12-23 months  | DTP                                                      | 4  |
| 16 | Ashbaugh [124]    | 2018 | DRC          | 6-59 months   | MCV                                                      | 9  |
| 17 | Asuman [125]      | 2018 | Ghana        | 12-59 months  | Full (BCG + 3DTP + 3OPV + 1MCV)                          | 8  |
| 18 | Boulton [126]     | 2018 | Bangladesh   | 12-24 months  | BCG, OPV, DTP, MCV, Full (BCG + 3Penta + 3OPV + 1MCV)    | 7  |
| 19 | Burroway [127]    | 2018 | Nigeria      | 12-24 months  | Full (BCG + 3DTP + 4OPV + 1MCV)                          | 7  |
| 20 | Imran [128]       | 2018 | Pakistan     | 12-23 months  | OPV                                                      | 7  |
| 21 | Khan [129]        | 2018 | India        | 12-23 months  | BCG, OPV, DTP, MCV, Full (BCG + 3DTP + 3 OPV + 1MCV)     | 9  |
| 22 | Kols [130]        | 2018 | Pakistan     | 12-23 months  | BCG, OPV, DTP, MCV, Full (BCG +3DTP + 3OPV + 1MCV)       | 9  |
| 23 | McGavin [131]     | 2018 | Nigeria      | 12-24 months  | Full (BCG + 3DTP + 4OPV + 1MCV)                          | 9  |
| 24 | Raza [132]        | 2018 | Pakistan     | 12-23 months  | Full (BCG +3DTP + 3OPV + 3HepB + 3Hib + 1MCV)            | 5  |
| 25 | Shenton [133]     | 2018 | Afghanistan  | 12-60 months  | Full (BCG +3Penta + 3OPV + 1MCV)                         | 10 |
| 26 | Shenton [134]     | 2018 | India        | 12-48 months  | Full (BCG + 3OPV + 3DTP + MCV)                           | 8  |
| 27 | Sohn [135]        | 2018 | Multicountry | Not specified | BCG, OPV, DTP, MCV                                       | 7  |
| 28 | Lungu [136]       | 2019 | Malawi       | Not specified | Full (not specified)                                     | 1  |
| 29 | Masters [137]     | 2019 | Kenya        | 12-23 months  | BCG, OPV, DTP, MCV, Full (BCG + 3Penta + 3OPV + 1MCV)    | 10 |
| 30 | Vyas [138]        | 2019 | Bangladesh   | Not specified | BCG, DTP, MCV                                            | 3  |

Notes:

1  
2  
3  
4  
5  
6  
7  
8  
9  
10  
11  
12  
13  
14  
15  
16  
17  
18  
19  
20  
21  
22  
23  
24  
25  
26  
27  
28  
29  
30  
31  
32  
33  
34  
35  
36  
37  
38  
39  
40  
41  
42  
43  
44  
45  
46  
47

BCG, bacillus Calmette-Guérin; DRC, Democratic Republic of the Congo; DTP, diphtheria –tetanus-pertussis vaccine; HepB, hepatitis B vaccine; Hib, *Haemophilus influenzae* type b vaccine; MCV, measles-containing vaccine; MMR, measles-mumps-rubella vaccine; OPV, oral polio vaccine; Penta, pentavalent vaccine; SIA, supplementary immunization activity; YF, yellow fever

For peer review only

## RESULTS

Our search terms initially yielded 938 papers; 318 from PubMed, 323 from EBSCOhost, and 211 from POPLINE. An additional 86 papers were identified through searching the references of selected papers. After removing duplicates, 551 papers remained. These papers' abstracts were screened using the inclusion and exclusion criteria to narrow down the study pool to 143 papers. However, during full text screen and data extraction another 18 studies were removed, which left 125 (Figure 1).

The quality sum score (possible range from 0-10) was on average 6.48 with a median of 7. The most commonly missed items contributing to a lower quality sum score were absence of exact P-values or confidence intervals (64% did not), not including estimates of random variability for the outcome (52%), and failure to account for appropriate use of clustering and weights (44%).

DHS has operated in a total of 92 countries since its inception, and between 2003 and 2016, has conducted surveys in 71 different countries.

Overall, 23 (18%) studies used DHS datasets from multiple countries, ranging from 2 countries [81,96,107] to 86 countries [11]. Seven studies used data from multiple African countries [56,69,84,98,113,122,123], 4 from just Asian countries [72,81,96,135], 1 from the Americas [107], and the remainder (11) used data from multiple continents [10,11,111,12,21,30,53,74,88,101,104]. For one study, we were unable to determine what exact countries were included in the analysis [111].

Figure 2 is a choropleth map showing which countries' DHS dataset have been used for vaccination studies. The most frequently represented country is India (26 studies, 21%), followed by Nigeria (17, 14%), Ethiopia and Pakistan (7 each, 6%), and Bangladesh (6, 5%). Notably, there are many countries (44) in the Americas, Europe, and Africa, which had one or more DHS conducted between 2003 and 2016 yet for which there are no corresponding single-country papers published using DHS data in this scoping review. However, most of these countries were a part of multicountry studies. Only five countries' DHS datasets were not part of any (single country or multicountry) DHS study: Cabo Verde, Maldives, Morocco, Sri Lanka, and Ukraine.

Characteristics of the papers are shown in Table 1. About half (51%) of studies included children 12 to 23 or 24 months of age, and the two next most common age ranges were 12 to 59 or 60 months of age (11%) and 0 to 59 months of age (8%).

Full vaccination was assessed in three-fourths (94, 75%) of papers; otherwise, the four most common vaccines assessed one at a time were MCV (39, 31%), DTP (36, 29%), polio (33, 26%), and BCG (27, 22%). There were at least 12 different definitions of full vaccination used in the papers including in this scoping review. Of the 94 papers which evaluated full vaccination coverage, most (66, 70%) used a traditional schedule based off of the four vaccines first

1  
2  
3 296 recommended for the WHO's EPI in 1974: 1 dose BCG, 3 doses polio, 3 doses DTP, and 1 dose  
4 297 MCV. Five (5%) papers modified this traditional definition to include a birth dose of polio, and  
5 298 eleven others used a pentavalent vaccine instead of DTP (of these, 3 had a 4 dose polio  
6 299 schedule, and 8 had a 3-dose polio schedule). Other papers modified the traditional definition  
7 300 in order to include yellow fever (in a total of 4 papers), measles-mumps-rubella vaccine (in one  
8 301 paper), or to exclude certain vaccine series, like measles, polio, or BCG. Some measure of DTP  
9 302 was included in all definitions of full vaccination. No papers included information about PCV  
10 303 or rotavirus vaccine as an outcome in a multivariable regression model, although one used  
11 304 rotavirus vaccine as a predictor variable [107].  
12 305

13 306 Four variables were used in a majority of studies. The top 10 variables used in a study (with  
14 307 their relationship shown in a model) are maternal education (in 94, or 75% of studies), wealth  
15 308 index (88, 70%), urbanicity (79, 63%), child's sex (73, 58%), mother's age (60, 48%), birth order  
16 309 (51, 41%), delivery location (42, 34%), ANC visits (34, 27%), media exposure (33, 26%), and  
17 310 paternal education (32, 26%).  
18 311

19 312 The relationship between the most commonly used predictor and vaccination outcomes is  
20 313 shown in Figure 3. For most predictors there is a relatively clear relationship to vaccination  
21 314 outcome. For a majority of studies, greater vaccination coverage (across any vaccination  
22 315 outcome considered) was related to maternal education (in 84% of studies that considered the  
23 316 variable), higher wealth index (83%), more ANC visits (76%), greater media exposure (76%), an  
24 317 institutional birth (69%), and more paternal education (56%). For several predictors, a large  
25 318 proportion of studies found no significant relationship. This was especially true for child's sex  
26 319 (66% of studies), more paternal education (44%), and urbanicity (43%). Sibling composition was  
27 320 one variable for which there was no clear relationship with the outcome: in 41% of studies,  
28 321 having more older siblings was associated with lower vaccination coverage, in 8% it was  
29 322 associated with higher vaccination coverage, and for the rest of studies, there was no significant  
30 323 relationship (35%) or there was a significant, non-monotonic relationship (12%).  
31 324

## 32 325 **DISCUSSION**

33 326

34 327 Vaccination programs enjoy wide support from many international health organizations and  
35 328 national governments. Vaccination has achieved the sole instance of human disease eradication  
36 329 – smallpox, while polio, measles, and rubella have been eliminated in some regions of the world  
37 330 [1,139]. Global vaccination coverage has increased in recent years but 12.8 million children in  
38 331 2015 still had not yet received DTP dose 1 [6], a common marker of routine immunization  
39 332 initiation. Regularly conducted studies on vaccination uptake are necessary to assessing  
40 333 population level susceptibility and immunization program reach while also ensuring that  
41 334 countries are on track with international guidelines for maintaining high vaccination coverage  
42 335 and the control or elimination of certain vaccine-preventable diseases. The DHS datasets tend to  
43 336 be very large, both in number of variables looked at and number of participants surveyed. This  
44 337 allows the examination of many possible associations with sufficient statistical power and the  
45 338 ability to control for a number of possible confounders.  
46  
47  
48  
49  
50  
51  
52  
53  
54  
55  
56  
57  
58  
59  
60

339  
340 DHS is not conducted in all LMICs, only in certain countries with a USAID presence, and it is  
341 conducted at irregular intervals. However, it is one of the most widely available surveys for  
342 assessing vaccinations globally. This systematic review found wide variation in how full  
343 vaccination was defined across 125 studies using DHS data between 2005 and 2018. However,  
344 the majority of studies did look at full vaccination and defined it according to the WHO's EPI  
345 schedule; 1 dose BCG, 3 doses polio, 3 doses DTP, and 1 dose MCV. Additionally, studies  
346 looked at similar sub-populations (children <5) and very similar predictors, with the most  
347 common being maternal education, wealth, urbanicity, and child's sex.

348  
349 The vaccines commonly evaluated reflect priorities of international efforts. For example, polio  
350 was targeted for elimination by 2018 [140]. Measles is also subject to an international  
351 elimination effort [141,142], and all 6 WHO regional offices have established target dates for  
352 elimination [143]. BCG was one of the first vaccines ideally administered shortly after birth  
353 (joined more recently in certain locations with HepB and polio birth doses). And DTP dose 3 has  
354 long been used as a proxy for adherence to repeat visits to immunization appointments  
355 [144,145]. As more vaccines are added to the vaccine schedule, not only does it become more  
356 complicated, but it likely introduces the potential for greater diversity among countries in their  
357 respective EPI schedules. Over the past few decades, DHS has operated in 92 countries.  
358 However, a significant number of papers came from a relatively small number of countries. We  
359 note the most commonly used countries (India, Nigeria, Ethiopia, Pakistan, and Bangladesh) are  
360 among the 12 most populous countries in the world, and, with the exception of Bangladesh, are  
361 among the five countries with the most number of unvaccinated children [8]. Given that  
362 countries have control over their own vaccine policies and utilize a wide variety of  
363 socioeconomic variables across individual countries, more country-specific analyses of DHS  
364 vaccination data is important.

### 365 366 **Recommendations for future analyses**

367  
368 This study identified the variables commonly used as explanatory variables in multivariable  
369 regression models. Many studies appeared to use the DHS datasets to test the significance and  
370 estimate the strength of association for many explanatory variables concomitantly. Since DHS is  
371 a cross-sectional study it cannot be used to investigate the effect of an exposure which could  
372 vary across time, such as education or urbanicity. However, a strength of DHS is its ability to be  
373 used as a hypothesis generating device. Associations can subsequently be examined in other  
374 types of studies, such as cohort studies.

375  
376 However, given consistent relationships between commonly used predictors and outcomes, it is  
377 worth revisiting the use of DHS datasets in multivariable analyses. First, given this consistency,  
378 it is more important than ever to consider the plausible causal relationships across all variables  
379 utilized in a model. An approach widely used in epidemiology is to chart the directionality of  
380 relationships among variables through directed acyclic graphs (DAGs) [146]. Online software,  
381 like dagitty.net, can be used to build these models and assess which variables should be

1  
2  
3 382 included in the final multivariable model. A potential problem is inclusion of so many variables  
4 383 in one model can obscure the mediating effects of certain variables [147]. For example,  
5 384 researchers examining the relationship between media exposure and vaccination status may  
6 385 include maternal age as a confounder. However, the parameter estimate for maternal age in this  
7 386 multivariable model includes the mediator media exposure. Theoretically, a model with age as  
8 387 the main predictor and with media exposure as a main predictor would have different sets of  
9 388 covariates. Although the potential impact of inappropriately controlling for mediation is  
10 389 context-specific, one study suggests parameter estimates may change up to 10%-25% [148].  
11  
12  
13 390

14 391 Evolving immunization schedules mean that future studies will likely take local programmatic  
15 392 considerations into account. However, to make cross country comparisons, studies could still  
16 393 provide an estimate of full vaccination using the traditional BCG, 3 dose polio, 3 dose DTP, and  
17 394 1 dose MCV schedule.  
18 395

19 396 Timeliness has also emerged as an important dimension of vaccination uptake within the past  
20 397 two decades [149,150]. Measures of timeliness require vaccination dates [14], information  
21 398 missing from many individuals in the DHS datasets. For example, in the 2006-2007 Pakistan  
22 399 DHS EPI immunization cards, and thus data on vaccination dates, were available for just 10% of  
23 400 cases [85].  
24  
25  
26 401

27 402 Finally, researchers analyzing DHS data should be aware of its structure and limitations. Most  
28 403 DHS samples are stratified and based on clusters. Studies should use survey procedures and  
29 404 weights to ensure that estimates are representative of the national population and that standard  
30 405 errors are honest reflections of the sampling structure. Additionally, because DHS includes so  
31 406 many individuals with unknown vaccination age, any study should account for this substantial  
32 407 left censoring, through Turnbull estimation methods [151] or accelerated failure time models. A  
33 408 substantial minority of studies examined did not specify the age range of the study population.  
34 409 This has implications for timeliness but should be presented in studies calculating more  
35 410 traditional measures of vaccine uptake that do not incorporate timing or age.  
36  
37  
38 411

39 412 The DHS provides national estimates from politically neutral sources over time, in countries  
40 413 where USAID operates. Its continued existence ensures that reliable, comparable, and nationally  
41 414 representative data sources are publicly available. Other surveys, like the District Level  
42 415 Household Survey (DLHS) and the Annual Health Survey (AHS) in India and the Multiple  
43 416 Indicators Cluster Survey (MICS) in over 100 countries, are developed in close collaboration  
44 417 with DHS [152,153].  
45  
46  
47 418

### 48 419 **Limitations**

49 420  
50 421 There are several limitations to this study. Because the study populations, use of explanatory  
51 422 variables, and definitions of outcomes differed among studies, we were unable to conduct a  
52 423 meta-analysis to compare the association of various explanatory variables on outcomes. We did  
53 424 not examine the grey literature or non-English language papers as part of this review, nor did  
54  
55  
56  
57  
58  
59  
60

1  
2  
3 425 we review reports which may have listed vaccination coverage, but did not include some  
4 426 statistical analysis. Inclusion of these types of articles could have included data from more  
5 427 countries. Vaccination data from the DHS is limited in that it partially comes from information  
6 428 contained on vaccination cards [154], and partially from parental recall – with its obvious  
7 429 potential for errors. However, some countries, such as Ethiopia, have attempted to combat this  
8 430 problem in recent years through the introduction of a Health Facility Questionnaire. This  
9 431 questionnaire is used to record vaccination information for all children, who were discovered to  
10 432 not have a vaccination card during administration of the Woman’s Questionnaire [155]. In  
11 433 addition, since the DHS is a standardized questionnaire there is limited opportunity to modify  
12 434 the survey to be locally relevant and take predictors into account that may only be relevant in  
13 435 parts of the country. However, overall the DHS programs are widely available surveys  
14 436 providing researchers, policymakers, and the public with nationally representative data. These  
15 437 data provide a basis for evaluation of immunization programs that would either not exist or not  
16 438 be as robust in their absence.  
17  
18  
19  
20  
21

## 22 440 **Conclusions**

23 441  
24 442 This scoping review of papers about vaccination published using DHS data found diversity in  
25 443 analyses and qualities of studies. Although certain countries – like India, Nigeria, Pakistan, and  
26 444 Ethiopia – have had  $\geq 7$  vaccination studies published using DHS data, there are dozens of  
27 445 countries whose vaccination data have not yet been published within single-country studies.  
28 446 Studies find consistent relationships between greater vaccination uptake and more maternal  
29 447 education, higher wealth index, more ANC visits, greater media exposure, and institutional  
30 448 delivery. The relationship between birth order and vaccination status is more varied across  
31 449 countries. Researchers using the DHS datasets should understand the limitations of using  
32 450 recorded vaccination dates, and should clarify the interpretation of estimates from  
33 451 multivariable analyses given the potential for mediation.  
34  
35  
36  
37  
38  
39  
40  
41  
42  
43  
44  
45  
46  
47  
48  
49  
50  
51  
52  
53  
54  
55  
56  
57  
58  
59  
60



1  
2  
3 456 **Acknowledgements**

4 457  
5  
6 458 We are grateful to the DHS personnel who diligently carry out their work and to USAID for  
7 459 sponsoring the DHS projects.

8 460  
9 461 **Funding**

10 462  
11 463 ALW's salary was supported by the National Institute Of Allergy And Infectious Diseases of the  
12 464 National Institutes of Health under Award Number K01AI137123. The content is solely the  
13 465 responsibility of the authors and does not necessarily represent the official views of the  
14 466 National Institutes of Health.

15 467  
16 468 **Competing Interests**

17 469  
18 470 The authors declare no competing interests.

19 471  
20 472 **Author contributions**

21 473  
22 474 MLB conceived of the study design, helped interpret the data, and revised the manuscript  
23 475 critically for important intellectual content. LMS and BFC downloaded manuscripts, assessed  
24 476 their fit for this systematic review, abstracted data from the manuscripts, completed qualitative  
25 477 synthesis, and helped revise the manuscript critically for important intellectual content. MJ  
26 478 abstracted data from the manuscripts and helped revise the manuscript critically for important  
27 479 intellectual content. ALW helped interpret the data, and drafted the article. All authors gave  
28 480 final approval of the manuscript to be published.

29 481  
30 482 **Data sharing statement**

31 483  
32 484 The data abstracted from these studies are publicly available:  
33 485 <https://doi.org/10.6084/m9.figshare.12177135>

34 486  
35 487  
36 488  
37 489  
38 490

## 491 REFERENCES

- 492
- 493 1 Centers for Disease Control and Prevention. Ten great public health achievements, 1900–  
494 1999: impact of vaccines universally recommended for children. *Morb Mortal Wkly Rep*  
495 1999;**48**:243–8.
- 496 2 Roush SW, Murphy T V. Historical comparisons of morbidity and mortality for vaccine-  
497 preventable diseases in the United States. *JAMA* 2007;**298**:2155–63.  
498 doi:10.1001/jama.298.18.2155
- 499 3 Lozano R, Naghavi M, Foreman K, *et al.* Global and regional mortality from 235 causes of  
500 death for 20 age groups in 1990 and 2010: a systematic analysis for the Global Burden of  
501 Disease Study 2010. *Lancet* 2012;**380**:2095–128. doi:10.1016/S0140-6736(12)61728-0
- 502 4 Black RE, Cousens S, Johnson HL, *et al.* Global, regional, and national causes of child  
503 mortality in 2008: a systematic analysis. *Lancet (London, England)* 2010;**375**:1969–87.  
504 doi:10.1016/S0140-6736(10)60549-1
- 505 5 World Health Organization. Summary of WHO Position Papers - Recommendations for  
506 Routine Immunization.  
507 2017.[http://www.who.int/immunization/policy/Immunization\\_routine\\_table1.pdf](http://www.who.int/immunization/policy/Immunization_routine_table1.pdf)  
508 (accessed 7 Sep 2017).
- 509 6 Casey RM, Dumolard L, Danovaro-Holliday MC, *et al.* Global Routine Vaccination  
510 Coverage, 2015. *Morb Mortal Wkly Rep* 2016;**65**:1270–3.
- 511 7 GAVI Alliance. Vaccine goal indicators. GAVI. 2015.[http://www.gavi.org/results/goal-  
512 level-indicators/vaccine-goal-indicators/](http://www.gavi.org/results/goal-level-indicators/vaccine-goal-indicators/) (accessed 2 Jun 2016).
- 513 8 Peck M, Gacic-Dobo M, Diallo MS, *et al.* Global routine vaccination coverage, 2018. *Morb*  
514 *Mortal Wkly Rep* 2019;**68**:937–42. doi:10.15585/mmwr.mm6645a3
- 515 9 The DHS Program. The DHS Program: Demographic and Health Surveys.  
516 2017.<https://dhsprogram.com/> (accessed 3 Oct 2017).
- 517 10 Arsenault C, Johri M, Nandi A, *et al.* Country-level predictors of vaccination coverage  
518 and inequalities in Gavi-supported countries. *Vaccine* 2017;**35**:2479–88.  
519 doi:10.1016/j.vaccine.2017.03.029
- 520 11 Restrepo-Méndez MC, Barros AJD, Wong KLM, *et al.* Inequalities in full immunization  
521 coverage : trends in low- and middle-income countries. *Bull World Heal Organ*  
522 2016;**94**:794–805. doi:10.2471/BLT.15.162172
- 523 12 Restrepo-Méndez MC, Barros AJD, Wong KLM, *et al.* Missed opportunities in full  
524 immunization coverage: Findings from low- and lower-middle-income countries. *Glob*  
525 *Health Action* 2016;**9**:1–6. doi:10.3402/gha.v9.30963
- 526 13 Moher D, Liberati A, Tetzlaff J, *et al.* Preferred reporting items for systematic reviews and  
527 meta-analyses: the PRISMA statement. *Ann Intern Med* 2009;**151**:264–9, W64.
- 528 14 Masters NB, Wagner AL, Boulton ML. Vaccination timeliness in low- and middle-income  
529 countries: a systematic review of the literature, 2007-2017. *Hum Vaccin Immunother*  
530 2019;**15**:2790–805. doi:10.1080/21645515.2019.1616503
- 531 15 Downs SH, Black N. The feasibility of creating a checklist for the assessment of the  
532 methodological quality both of randomised and non-randomised studies of health care  
533 interventions. *J Epidemiol Community Heal* 1998;**52**:377–84.

- 1  
2  
3 534 16 Natural Earth. Admin 0 - Countries.  
4 535 2020.[https://www.naturalearthdata.com/downloads/50m-cultural-vectors/50m-admin-0-](https://www.naturalearthdata.com/downloads/50m-cultural-vectors/50m-admin-0-countries-2/)  
5 536 countries-2/ (accessed 30 Mar 2020).  
6  
7 537 17 Bowie C, Mathanga D, Misiri H. Poverty, access and immunization in Malawi - a  
8 538 descriptive study. *Malawi Med. J.* 2006;**18**:19–27. doi:10.4314/mmj.v18i1.10902  
9  
10 539 18 Choi JY, Lee S-H. Does prenatal care increase access to child immunization? Gender bias  
11 540 among children in India. *Soc Sci Med* 2006;**63**:107–17. doi:10.1016/j.socscimed.2005.11.063  
12 541 19 Gaudin S, Yazbeck AS. Immunization in india 1993-1999: Wealth, gender, and regional  
13 542 inequalities revisited. *Soc Sci Med* 2006;**62**:694–706. doi:10.1016/j.socscimed.2005.06.042  
14 543 20 Akmatov MK, Kretzschmar M, Krämer A, *et al.* Determinants of childhood vaccination  
15 544 coverage in Kazakhstan in a period of societal change: Implications for vaccination  
16 545 policies. *Vaccine* 2007;**25**:1756–63. doi:10.1016/j.vaccine.2006.11.030  
17 546 21 Anand S, Bärnighausen T. Health workers and vaccination coverage in developing  
18 547 countries: an econometric analysis. *Lancet* 2007;**369**:1277–85. doi:10.1016/S0140-  
19 548 6736(07)60599-6  
20  
21 549 22 Bhandari P, Shrestha SS, Ghimire DJ. Sociocultural and geographical disparities in child  
22 550 immunization in Nepal. *Asia-Pacific Popul J* 2007;**22**:43–64.  
23 551 23 Datar A, Mukherji A, Sood N. Health infrastructure & immunization coverage in rural  
24 552 India. *Indian J Med Res* 2007;**125**:31–42.  
25 553 24 Minh Thang N, Bhushan I, Bloom E, *et al.* Child immunization in Vietnam: situation and  
26 554 barriers to coverage. *J Biosoc Sci* 2007;**39**:41–58. doi:10.1017/S0021932006001234  
27 555 25 Munthali AC. Determinants of vaccination coverage in Malawi: evidence from the  
28 556 demographic and health surveys. *Malawi Med J* 2007;**19**:79–82.  
29 557 doi:10.4314/mmj.v19i2.10934  
30 558 26 Ntenda PAM, Chuang K-Y, Tiruneh FN, *et al.* Analysis of the effects of individual and  
31 559 community level factors on childhood immunization in Malawi. *Vaccine* Published  
32 560 Online First: 2017. doi:10.1016/j.vaccine.2017.02.036  
33 561 27 Chidiebere ODI, Uchenna E, Kenechi OS. Maternal sociodemographic factors that  
34 562 influence full child immunisation uptake in Nigeria. *SAJCH South African J Child Heal*  
35 563 2014;**8**:138–42. doi:10.7196/SAJCH.661  
36 564 28 Gatchell M, Thind A, Hagigi F. Informing state-level health policy in India: The case of  
37 565 childhood immunizations in Maharashtra and Bihar. *Acta Paediatr Int J Paediatr*  
38 566 2008;**97**:124–6. doi:10.1111/j.1651-2227.2007.00569.x  
39 567 29 Halder AK, Kabir M. Inequalities in infant immunization coverage in Bangladesh. *Heal*  
40 568 *Serv Insights* 2008;**1**:5–11.  
41 569 30 Meheus F, Van Doorslaer E. Achieving better measles immunization in developing  
42 570 countries: does higher coverage imply lower inequality? *Soc Sci Med* 2008;**66**:1709–18.  
43 571 doi:10.1016/j.socscimed.2007.12.036  
44 572 31 Patra N. Exploring the Determinants of Childhood Immunisation. *Econ Polit Wkly*  
45 573 2008;**43**:97–104.  
46 574 32 Antai D. Inequitable childhood immunization uptake in Nigeria: a multilevel analysis of  
47 575 individual and contextual determinants. *BMC Infect Dis* 2009;**9**:181. doi:10.1186/1471-  
48 576 2334-9-181  
49  
50  
51  
52  
53  
54  
55  
56  
57  
58  
59  
60

- 1  
2  
3 577 33 Antai D. Faith and Child Survival: the Role of Religion in Childhood Immunization in  
4 578 Nigeria. *J Biosoc Sci* 2009;**41**:57. doi:10.1017/S0021932008002861
- 5 579 34 Bondy JN, Thind A, Koval JJ, *et al.* Identifying the determinants of childhood  
6 580 immunization in the Philippines. *Vaccine* 2009;**27**:169–75. doi:10.1016/j.vaccine.2008.08.042
- 7 581 35 Corsi DJ, Bassani DG, Kumar R, *et al.* Gender inequity and age-appropriate immunization  
8 582 coverage in India from 1992 to 2006. *BMC Int Health Hum Rights* 2009;**9 Suppl 1**:S3.  
9 583 doi:10.1186/1472-698X-9-S1-S3
- 10 584 36 Osaki K, Hattori T, Kosen S, *et al.* Investment in home-based maternal, newborn and  
11 585 child health records improves immunization coverage in Indonesia. *Trans R Soc Trop Med*  
12 586 *Hyg* 2009;**103**:846–8. doi:10.1016/j.trstmh.2009.03.011
- 13 587 37 Sia D, Fournier P, Kobiané J-F, *et al.* Rates of coverage and determinants of complete  
14 588 vaccination of children in rural areas of Burkina Faso (1998-2003). *BMC Public Health*  
15 589 2009;**9**:416. doi:10.1186/1471-2458-9-416
- 16 590 38 Antai D. Migration and child immunization in Nigeria: individual- and community-level  
17 591 contexts. *BMC Public Health* 2010;**10**:116. doi:10.1186/1471-2458-10-116
- 18 592 39 Hong R, Chhea V. Trend and inequality in immunization dropout among young children  
19 593 in Cambodia. *Matern Child Health J* 2010;**14**:446–52. doi:10.1007/s10995-009-0466-1
- 20 594 40 Rahman M, Obaida-Nasrin S. Factors affecting acceptance of complete immunization  
21 595 coverage of children under five years in rural Bangladesh. *Salud Publica Mex* 2010;**52**:134–  
22 596 40. doi:10.1590/S0036-36342010000200005
- 23 597 41 Sahu D, Pradhan J, Jayachandran V, *et al.* Why immunization coverage fails to catch up in  
24 598 India? A community-based analysis. *Child Care Health Dev* 2010;**36**:332–9.  
25 599 doi:10.1111/j.1365-2214.2009.01003.x
- 26 600 42 Semali IA. Trends in immunization completion and disparities in the context of health  
27 601 reforms: the case study of Tanzania. *BMC Health Serv Res* 2010;**10**:299. doi:10.1186/1472-  
28 602 6963-10-299
- 29 603 43 Abuya BA, Onsomu EO, Kimani JK, *et al.* Influence of maternal education on child  
30 604 immunization and stunting in Kenya. *Matern Child Health J* 2011;**15**:1389–99.  
31 605 doi:10.1007/s10995-010-0670-z
- 32 606 44 Antai D. Rural-urban inequities in childhood immunisation in Nigeria: The role of  
33 607 community contexts. *African J Prim Heal Care Fam Med* 2011;**3**. doi:10.4102/phcfm.v3i1.238
- 34 608 45 Fernandez RC, Awofeso N, Rammohan A. Determinants of apparent rural-urban  
35 609 differentials in measles vaccination uptake in Indonesia. *Rural Remote Health* 2011;**11**:1–14.
- 36 610 46 Fernandez R, Rammohan A, Awofeso N. Correlates of first dose of measles vaccination  
37 611 delivery and uptake in Indonesia. *Asian Pac J Trop Med* 2011;**4**:140–5. doi:10.1016/S1995-  
38 612 7645(11)60055-2
- 39 613 47 Kumar A, Mohanty SK. Socio-economic differentials in childhood immunization in India,  
40 614 1992-2006. *J Popul Res* 2011;**28**:301–24.
- 41 615 48 Lauridsen J, Pradhan J, Kruk M, *et al.* Socio-economic inequality of immunization  
42 616 coverage in India. *Health Econ Rev* 2011;**1**:11. doi:10.1186/2191-1991-1-11
- 43 617 49 Pandey S. Determinants of child immunization in Nepal : The role of women ' s  
44 618 empowerment. *Health Educ J* 2011;**71**:642–53. doi:10.1177/0017896911419343
- 45 619 50 Singh A. Inequality of Opportunity in Indian Children: The Case of Immunization and  
46  
47  
48  
49  
50  
51  
52  
53  
54  
55  
56  
57  
58  
59

- 1  
2  
3 620 Nutrition. *Popul Res Policy Rev* 2011;**30**:861–83. doi:10.1007/s11113-011-9214-5
- 4 621 51 Afzal N, Zainab B. Determinants and Status of Vaccination in Bangladesh. *Dhaka Univ J*  
5 622 *Sci* 2012;**60**:47–51. doi:10.3329/dujs.v60i1.10336
- 6 623 52 Antai D. Gender inequities, relationship power, and childhood immunization uptake in  
7 624 Nigeria: A population-based cross-sectional study. *Int J Infect Dis* 2012;**16**:e136–45.  
8 625 doi:10.1016/j.ijid.2011.11.004
- 9 626 53 Rammohan A, Awofeso N, Fernandez RC. Paternal education status significantly  
10 627 influences infants' measles vaccination uptake, independent of maternal education status.  
11 628 *BMC Public Health* 2012;**12**:336. doi:10.1186/1471-2458-12-336
- 12 629 54 Sabarwal S, McCormick MC, Silverman JG, *et al.* Association between maternal intimate  
13 630 partner violence victimization and childhood immunization in India. *J Trop Pediatr*  
14 631 2012;**58**:107–13. doi:10.1093/tropej/fmr052
- 15 632 55 Singh A. Gender based within-household inequality in childhood immunization in India:  
16 633 Changes over time and across regions. *PLoS One* 2012;**7**:e33045.  
17 634 doi:10.1371/journal.pone.0035045
- 18 635 56 Wiysonge CS, Uthman OA, Ndumbe PM, *et al.* Individual and contextual factors  
19 636 associated with low childhood immunisation coverage in Sub-Saharan Africa: A  
20 637 multilevel analysis. *PLoS One* 2012;**7**. doi:10.1371/journal.pone.0037905
- 21 638 57 Barman D, Dutta A. Access and barriers to immunization in West Bengal, India: Quality  
22 639 matters. *J Heal Popul Nutr* 2013;**31**:510–22.
- 23 640 58 Bbaale E. Factors influencing childhood immunization in Uganda. *J Heal Popul Nutr*  
24 641 2013;**31**:118–27. doi:10.3329/jhpn.v31i1.14756
- 25 642 59 Haque SMR, Bari W. Positive Role of Maternal Education on Measles Vaccination  
26 643 Coverage in Bangladesh. *Int J Psychol Behav Sci* 2013;**3**:11–7.  
27 644 doi:10.5923/j.ijpbs.20130301.02
- 28 645 60 Kumar A, Ram F. Influence of Family Structure on Child Health: Evidence From India. *J*  
29 646 *Biosoc Sci* 2013;**45**:577–99. doi:10.1017/S0021932012000764
- 30 647 61 Moyer CA, Tadesse L, Fisseha S. The relationship between facility delivery and infant  
31 648 immunization in Ethiopia. *Int J Gynecol Obstet* 2013;**123**:217–20.  
32 649 doi:10.1016/j.ijgo.2013.06.030
- 33 650 62 Singh A, Singh A, Mahapatra B. The consequences of unintended pregnancy for maternal  
34 651 and child health in rural India: Evidence from prospective data. *Matern Child Health J*  
35 652 2013;**17**:493–500. doi:10.1007/s10995-012-1023-x
- 36 653 63 Singh K, Haney E, Olorunsaiye C. Maternal autonomy and attitudes towards gender  
37 654 norms: Associations with childhood immunization in Nigeria. *Matern Child Health J*  
38 655 2013;**17**:837–41. doi:10.1007/s10995-012-1060-5
- 39 656 64 Singh PK. Trends in Child Immunization across Geographical Regions in India: Focus on  
40 657 Urban-Rural and Gender Differentials. *PLoS One* 2013;**8**. doi:10.1371/journal.pone.0073102
- 41 658 65 Van Malderen C, Ogali I, Khasakhala A, *et al.* Decomposing Kenyan socio-economic  
42 659 inequalities in skilled birth attendance and measles immunization. *Int J Equity Health*  
43 660 2013;**12**:3. doi:10.1186/1475-9276-12-3
- 44 661 66 Adegboye O, Kotze D, Adegboye O. Multi-Year Trend Analysis of Childhood  
45 662 Immunization Uptake and Coverage in Nigeria. *J Biosoc Sci* 2014;**46**:225–39.
- 46  
47  
48  
49  
50  
51  
52  
53  
54  
55  
56  
57  
58  
59  
60

- doi:10.1017/S0021932013000254
- 663  
664 67 Bonfrer I, Van de Poel E, Van Doorslaer E. The effects of performance incentives on the  
665 utilization and quality of maternal and child care in Burundi. *Soc Sci Med* 2014;**123**:96–  
666 104. doi:10.1016/j.socscimed.2014.11.004
- 667 68 Bugvi AS, Rahat R, Zakar R, *et al.* Factors associated with non-utilization of child  
668 immunization in Pakistan: evidence from the Demographic and Health Survey 2006-07.  
669 *BMC Public Health* 2014;**14**:232. doi:10.1186/1471-2458-14-232
- 670 69 Canavan ME, Sipsma HL, Kassie GM, *et al.* Correlates of complete childhood vaccination  
671 in East African countries. *PLoS One* 2014;**9**:1–7. doi:10.1371/journal.pone.0095709
- 672 70 Clouston S, Kidman R, Palermo T. Social inequalities in vaccination uptake among  
673 children aged 0-59 months living in Madagascar: An analysis of Demographic and Health  
674 Survey data from 2008 to 2009. *Vaccine* 2014;**32**:3533–9. doi:10.1016/j.vaccine.2014.04.030
- 675 71 Ebot JO. Place Matters : Community Level Effects of Women ' s Autonomy on Ethiopian  
676 Children ' s Immunization Status. *Etude la Popul Africaine/African Popul Stud* 2014;**28**:1202–  
677 15.
- 678 72 Grundy J, Annear P, Chomat AM, *et al.* Improving average health and persisting health  
679 inequities - Towards a justice and fairness platform for health policy making in Asia.  
680 *Health Policy Plan* 2014;**29**:873–82. doi:10.1093/heapol/czt068
- 681 73 Heaton TB, Crookston B, Forste R, *et al.* Inequalities in child health in Bolivia: Has  
682 Morales made a difference? *Heal Sociol Rev* 2014;**23**:208–18.  
683 doi:10.1080/14461242.2014.11081974
- 684 74 Helleringer S, Abdelwahab J, Vandenant M. Polio supplementary immunization activities  
685 and equity in access to vaccination: Evidence from the demographic and health surveys. *J*  
686 *Infect Dis* 2014;**210**:S531–9. doi:10.1093/infdis/jiu278
- 687 75 Javed SA, Imran W, Haider A, *et al.* Mothers related differentials in childhood  
688 immunization uptake in Pakistan. *Res Humanit Soc Sci* 2014;**4**:62–72.
- 689 76 Luqman B, Titus Kolawole O. Mothers' health seeking behaviour and socio-economic  
690 differentials: A factor analysis of full childhood immunization in South-Western Nigeria.  
691 *J Public Heal Epidemiol* 2014;**6**:132–47. doi:10.5897/JJPH2013.0593
- 692 77 Malhotra C, Malhotra R, Østbye T, *et al.* Maternal autonomy and child health care  
693 utilization in India: Results from the National Family Health Survey. *Asia-Pacific J Public*  
694 *Heal* 2014;**26**:401–13. doi:10.1177/1010539511420418
- 695 78 Neupane S, Nwaru BI. Impact of prenatal care utilization on infant care practices in  
696 Nepal: A National representative cross-sectional survey. *Eur J Pediatr* 2014;**173**:99–109.  
697 doi:10.1007/s00431-013-2136-y
- 698 79 Prusty RK, Kumar A. Socioeconomic dynamics of gender disparity in childhood  
699 immunization in India, 1992-2006. *PLoS One* 2014;**9**:1992–2006.  
700 doi:10.1371/journal.pone.0104598
- 701 80 Rai RK, Singh PK, Singh L, *et al.* Individual characteristics and use of maternal and child  
702 health services by adolescent mothers in Niger. *Matern Child Health J* 2014;**18**:592–603.  
703 doi:10.1007/s10995-013-1276-z
- 704 81 Singh PK, Parsuraman S. Sibling composition and child immunization in India and  
705 Pakistan, 1990-2007. *World J Pediatr* 2014;**10**:145–50. doi:10.1007/s12519-014-0483-z

- 1  
2  
3 706 82 Singh PK, Parasuraman S, P.K. S, *et al.* 'Looking beyond the male-female dichotomy' -  
4 707 sibling composition and child immunization in India, 1992-2006. *Soc Sci Med*  
5 708 2014;**107**:145–53. doi:10.1016/j.socscimed.2014.02.017  
6  
7 709 83 Ushie BA, Fayehun OA, Ugal DB. Trends and patterns of under-5 vaccination in Nigeria,  
8 710 1990-2008: What manner of progress? *Child Care Health Dev* 2014;**40**:267–74.  
9 711 doi:10.1111/cch.12055  
10  
11 712 84 Wagner Z, Szilagyi PG, Sood N. Comparative performance of public and private sector  
12 713 delivery of BCG vaccination: Evidence from Sub-Saharan Africa. *Vaccine* 2014;**32**:4522–8.  
13 714 doi:10.1016/j.vaccine.2014.06.020  
14  
15 715 85 Zaidi SMA, Khowaja S, Dharma VK, *et al.* Coverage, timeliness, and determinants of  
16 716 immunization completion in Pakistan: Evidence from the Demographic and Health  
17 717 Survey (2006-07). *Hum Vaccines Immunother* 2014;**10**:1712–20. doi:10.4161/hv.28621  
18 718 86 Abadura SA, Lerebo WT, Kulkarni U, *et al.* Individual and community level determinants  
19 719 of childhood full immunization in Ethiopia: a multilevel analysis. *BMC Public Health*  
20 720 2015;**15**:972. doi:10.1186/s12889-015-2315-z  
21  
22 721 87 Ebot JO. 'Girl power!': The relationship between women's autonomy and children's  
23 722 immunization coverage in Ethiopia. *J Heal Popul Nutr* 2015;**33**:1–9. doi:10.1186/s41043-  
24 723 015-0028-7  
25  
26 724 88 Hajizadeh M, Heymann J, Strumpf E, *et al.* Paid maternity leave and childhood  
27 725 vaccination uptake: Longitudinal evidence from 20 low-and-middle-income countries.  
28 726 *Soc Sci Med* 2015;**140**:104–17. doi:10.1016/j.socscimed.2015.07.008  
29  
30 727 89 Lakew Y, Bekele A, Biadgilign S. Factors influencing full immunization coverage among  
31 728 12–23 months of age children in Ethiopia: evidence from the national demographic and  
32 729 health survey in 2011. *BMC Public Health* 2015;**15**:728. doi:10.1186/s12889-015-2078-6  
33 730 90 McGlynn N, Wilk P, Luginaah I, *et al.* Increased use of recommended maternal health  
34 731 care as a determinant of immunization and appropriate care for fever and diarrhoea in  
35 732 Ghana: An analysis pooling three demographic and health surveys. *Health Policy Plan*  
36 733 2015;**30**:895–905. doi:10.1093/heapol/czu090  
37  
38 734 91 Mukungwa T. Factors associated with full immunization coverage amongst children  
39 735 aged 12–23 months in Zimbabwe. *Etude la Popul Africaine* 2015;**29**:1761–74.  
40 736 92 Onsomu EO, Abuya B a, Okech IN, *et al.* Maternal Education and Immunization Status  
41 737 Among Children in Kenya. *Matern Child Health J* 2015;**19**:1724–33. doi:10.1007/s10995-015-  
42 738 1686-1  
43  
44 739 93 Osetinsky B, Gaydos LM, Leon JS. Predictors of completed childhood vaccination in  
45 740 Bolivia. *Int J Child Adolesc health* 2015;**8**:413–23.  
46  
47 741 94 Prusty RK, Keshri K. Differentials in child nutrition and immunization among migrants  
48 742 and non-migrants in Urban India. *Int J Migr Heal Soc Care* 2015;**11**:194–205.  
49 743 doi:10.1108/IJMHSC-02-2014-0006  
50  
51 744 95 Rossi R. Do maternal living arrangements influence the vaccination status of children age  
52 745 12-23 months? A data analysis of demographic health surveys 2010-11 from Zimbabwe.  
53 746 *PLoS One* 2015;**10**:1–19. doi:10.1371/journal.pone.0132357  
54 747 96 Schweitzer A, Krause G, Pessler F, *et al.* Improved coverage and timing of childhood  
55 748 vaccinations in two post-Soviet countries, Armenia and Kyrgyzstan. *BMC Public Health*

- 1  
2  
3 749 2015;15:798. doi:10.1186/s12889-015-2091-9
- 4 750 97 Shrivastwa N, Gillespie BW, Kolenic GE, *et al.* Predictors of Vaccination in India for  
5 751 Children Aged 12-36 Months. *Am J Prev Med* 2015;49:S435-44.  
6 752 doi:10.1016/j.amepre.2015.05.008
- 7 753 98 Singh K, Bloom S, Brodish P. Gender Equality as a Means to Improve Maternal and Child  
8 754 Health in Africa. *Heal Care Women Int* 2015;36:57-69.  
9 755 doi:doi:10.1080/07399332.2013.824971
- 10 756 99 Smith-Greenaway E, Madhavan S. Maternal migration and child health: An analysis of  
11 757 disruption and adaptation processes in Benin. *Soc Sci Res* 2015;54:146-58.  
12 758 doi:10.1016/j.ssresearch.2015.06.005
- 13 759 100 Tsawe M, Moto A, Netshivhera T, *et al.* Factors influencing the use of maternal healthcare  
14 760 services and childhood immunization in Swaziland. *Int J Equity Health* 2015;14:32.  
15 761 doi:10.1186/s12939-015-0162-2
- 16 762 101 Arsenault C, Harper S, Nandi A, *et al.* Monitoring equity in vaccination coverage: A  
17 763 systematic analysis of demographic and health surveys from 45 Gavi-supported  
18 764 countries. *Vaccine* 2016;35:951-9. doi:10.1016/j.vaccine.2016.12.041
- 19 765 102 Chima CC, Franzini L. Spillover effect of HIV-specific foreign aid on immunization  
20 766 services in Nigeria. *Int Health* 2016;8:108-15. doi:10.1093/inthealth/ihv036
- 21 767 103 Gurmu E, Etana D. Factors Influencing Children's Full Immunization in Ethiopia. *African*  
22 768 *Popul Stud* 2016;30:2306-17.
- 23 769 104 Hosseinpoor AR, Bergen N, Schlottheuber A, *et al.* State of inequality in diphtheria-  
24 770 tetanus-pertussis immunisation coverage in low-income and middle-income countries: A  
25 771 multicountry study of household health surveys. *Lancet Glob Heal* 2016;4:e617-26.  
26 772 doi:10.1016/S2214-109X(16)30141-3
- 27 773 105 Kriss JL, Goodson J, Machekanyanga Z, *et al.* Vaccine receipt and vaccine card availability  
28 774 among children of the apostolic faith: analysis from the 2010-2011 Zimbabwe  
29 775 demographic and health survey. *Pan Afr Med J* 2016;24:47.  
30 776 doi:10.11604/pamj.2016.24.47.8663
- 31 777 106 Kumar C, Singh PK, Singh L, *et al.* Socioeconomic disparities in coverage of full  
32 778 immunisation among children of adolescent mothers in India, 1990-2006: a repeated  
33 779 cross-sectional analysis. *BMJ Open* 2016;6:e009768. doi:10.1136/bmjopen-2015-009768
- 34 780 107 Schweitzer A, Pessler F, Akmatov MK. Impact of rotavirus vaccination on coverage and  
35 781 timing of pentavalent vaccination ??? Experience from 2 Latin American countries. *Hum*  
36 782 *Vaccines Immunother* 2016;12:1250-6. doi:10.1080/21645515.2015.1127486
- 37 783 108 Adedokun ST, Uthman OA, Adekanmbi VT, *et al.* Incomplete childhood immunization in  
38 784 Nigeria: a multilevel analysis of individual and contextual factors. *BMC Public Health*  
39 785 2017;17:236. doi:10.1186/s12889-017-4137-7
- 40 786 109 Aghaji AE. Trends in Measles Vaccination in Nigeria and Implications for Childhood  
41 787 Blindness. *Int J Med Heal Dev* 2017;22:82-8. doi:10.4314/jcm.v22i2.4
- 42 788 110 Ambel AA, Andrews C, Bakilana AM, *et al.* Examining changes in maternal and child  
43 789 health inequalities in Ethiopia. *Int J Equity Health* 2017;16:152. doi:10.1186/s12939-017-  
44 790 0648-1
- 45 791 111 Delprato M, Akyeampong K. The Effect of Early Marriage Timing on Women's and  
46  
47  
48  
49  
50  
51  
52  
53  
54  
55  
56  
57  
58  
59  
60



- 1  
2  
3 792 Children's Health in Sub-Saharan Africa and Southwest Asia. *Ann Glob Heal* 2017;**83**:557–  
4 793 67. doi:10.1016/j.aogh.2017.10.005  
5  
6 794 112 Herliana P, Douiri A. Determinants of immunisation coverage of children aged 12-59  
7 795 months in Indonesia: a cross-sectional study. *BMJ Open* 2017;**7**:e015790.  
8 796 doi:10.1136/bmjopen-2016-015790  
9  
10 797 113 Kazungu JS, Adetifa IMO. Crude childhood vaccination coverage in West Africa: Trends  
11 798 and predictors of completeness. *Wellcome open Res* 2017;**2**:12.  
12 799 doi:10.12688/wellcomeopenres.10690.1  
13 800 114 KC A, Nelin V, Raaijmakers H, *et al*. Increased immunization coverage addresses the  
14 801 equity gap in Nepal. *Bull World Health Organ* 2017;**95**:261–9. doi:10.2471/BLT.16.178327  
15 802 115 Khan MT, Zaheer S, Shafique K. Maternal education, empowerment, economic status and  
16 803 child polio vaccination uptake in Pakistan: a population based cross sectional study. *BMJ*  
17 804 *Open* 2017;**7**:e013853. doi:10.1136/bmjopen-2016-013853  
18 805 116 Mbengue MAS, Sarr M, Faye A, *et al*. Determinants of complete immunization among  
19 806 Senegalese children aged 12-23 months: evidence from the demographic and health  
20 807 survey. *BMC Public Health* 2017;**17**:630. doi:10.1186/s12889-017-4493-3  
21 808 117 Oleribe O, Kumar V, Awosika-Olumo A, *et al*. Individual and socioeconomic factors  
22 809 associated with childhood immunization coverage in Nigeria. *Pan Afr Med J* 2017;**26**:220.  
23 810 doi:10.11604/pamj.2017.26.220.11453  
24 811 118 Singh A, Patel SK. Gender differentials in feeding practices, health care utilization and  
25 812 nutritional status of children in Northern India. *Int J Hum Rights Healthc* Published Online  
26 813 First: 2017. doi:10.1108/IJHRH-05-2017-0023  
27 814 119 Uthman OA, Adedokun ST, Olukade T, *et al*. Children who have received no routine  
28 815 polio vaccines in Nigeria: Who are they and where do they live? *Hum Vaccin Immunother*  
29 816 2017;**13**:2111–22. doi:10.1080/21645515.2017.1336590  
30 817 120 Zuhair M, Roy RB. Socioeconomic Determinants of the Utilization of Antenatal Care and  
31 818 Child Vaccination in India. *Asia-Pacific J public Heal* 2017;**29**:649–59.  
32 819 doi:10.1177/1010539517747071  
33 820 121 Acharya P, Kismul H, Mapatano MA, *et al*. Individual- and community-level  
34 821 determinants of child immunization in the Democratic Republic of Congo: A multilevel  
35 822 analysis. *PLoS One* Published Online First: 2018. doi:10.1371/journal.pone.0202742  
36 823 122 Adetokunboh OO, Uthman OA, Wiysonge CS. Non-uptake of childhood vaccination  
37 824 among the children of HIV-infected mothers in sub-Saharan Africa: A multilevel analysis.  
38 825 *Hum Vaccin Immunother* 2018;**14**:2405–13. doi:10.1080/21645515.2018.1502524  
39 826 123 Adetokunboh OO, Uthman OA, Wiysonge CS. Effect of maternal HIV status on  
40 827 vaccination coverage among sub-Saharan African children: A socio-ecological analysis.  
41 828 *Hum Vaccin Immunother* 2018;**14**:2373–81. doi:10.1080/21645515.2018.1467204  
42 829 124 Ashbaugh HR, Hoff NA, Doshi RH, *et al*. Predictors of measles vaccination coverage  
43 830 among children 6-59 months of age in the Democratic Republic of the Congo. *Vaccine*  
44 831 2018;**36**:587–93. doi:10.1016/j.vaccine.2017.11.049  
45 832 125 Asuman D, Ackah CG, Enemark U. Inequalities in child immunization coverage in  
46 833 Ghana: evidence from a decomposition analysis. *Health Econ Rev* 2018;**8**:9.  
47 834 doi:10.1186/s13561-018-0193-7  
48  
49  
50  
51  
52  
53  
54  
55  
56  
57  
58  
59  
60

- 1  
2  
3 835 126 Boulton ML, Carlson BF, Power LE, *et al.* Socioeconomic factors associated with full  
4 836 childhood vaccination in Bangladesh, 2014. *Int J Infect Dis* Published Online First: 2018.  
5 837 doi:10.1016/j.ijid.2018.01.035  
6  
7 838 127 Burroway R, Hargrove A. Education is the antidote: Individual- and community-level  
8 839 effects of maternal education on child immunizations in Nigeria. *Soc Sci Med* 2018;**213**:63–  
9 840 71. doi:10.1016/j.socscimed.2018.07.036  
10  
11 841 128 Imran W, Abbas F, Javed SA. What is causing high polio vaccine dropout among  
12 842 Pakistani children? *Public Health* 2018;**164**:16–25. doi:10.1016/j.puhe.2018.07.008  
13 843 129 Khan J, Shil A, Prakash R. Exploring the spatial heterogeneity in different doses of  
14 844 vaccination coverage in India. *PLoS One* 2018;**13**:e0207209.  
15 845 doi:10.1371/journal.pone.0207209  
16  
17 846 130 Kols A, Gorar Z, Sharjeel M, *et al.* Provincial differences in levels, trends, and  
18 847 determinants of childhood immunization in Pakistan. *East Mediterr Heal J* 2018;**24**:333–44.  
19 848 doi:10.26719/2018.24.4.333  
20  
21 849 131 McGavin ZA, Wagner AL, Carlson BF, *et al.* Childhood full and under-vaccination in  
22 850 Nigeria, 2013. *Vaccine* 2018;**36**:7294–9. doi:10.1016/j.vaccine.2018.10.043  
23 851 132 Raza O, Lodhi FS, Morasae EK, *et al.* Differential achievements in childhood  
24 852 immunization across geographical regions of Pakistan: analysis of wealth-related  
25 853 inequality. *Int J Equity Health* 2018;**17**:122. doi:10.1186/s12939-018-0837-6  
26 854 133 Shenton LM, Wagner AL, Carlson BF, *et al.* Vaccination status of children aged 1-4 years  
27 855 in Afghanistan and associated factors, 2015. *Vaccine* 2018;**36**:5141–9.  
28 856 doi:10.1016/j.vaccine.2018.07.020  
29 857 134 Shenton LM, Wagner AL, Bettampadi D, *et al.* Factors Associated with Vaccination Status  
30 858 of Children Aged 12–48 Months in India, 2012–2013. *Matern Child Health J* 2018;**22**:1–10.  
31 859 doi:10.1007/s10995-017-2409-6  
32 860 135 Sohn M, Lin L, Jung M. Effects of Maternal Decisional Authority and Media Use on  
33 861 Vaccination for Children in Asian Countries. *Medicina (Kaunas)* 2018;**54**.  
34 862 doi:10.3390/medicina54060105  
35  
36 863 136 Lungu EA, Biesma R, Chirwa M, *et al.* Is the Urban Child Health Advantage Declining in  
37 864 Malawi?: Evidence from Demographic and Health Surveys and Multiple Indicator  
38 865 Cluster Surveys. *J Urban Health* 2019;**96**:131–43. doi:10.1007/s11524-018-0270-6  
39 866 137 Masters NB, Wagner AL, Carlson BF, *et al.* Childhood vaccination in Kenya:  
40 867 socioeconomic determinants and disparities among the Somali ethnic community. *Int J*  
41 868 *Public Health* 2019;**64**:313–22. doi:10.1007/s00038-018-1187-2  
42 869 138 Vyas P, Kim D, Adams A. Understanding Spatial and Contextual Factors Influencing  
43 870 Intraregional Differences in Child Vaccination Coverage in Bangladesh. *Asia-Pacific J*  
44 871 *public Heal* 2019;**31**:51–60. doi:10.1177/1010539518813604  
45 872 139 Centers for Disease Control and Prevention. Achievements in public health: elimination  
46 873 of rubella and congenital rubella syndrome-US, 1969-2004. *MMWR Morb Mortal Wkly Rep*  
47 874 2005;**54**:279–82.  
48 875 140 Mwenge W, Mbulu LK, Okeibunor J, *et al.* Polio Eradication Initiative: Contribution to  
49 876 improved communicable diseases surveillance in WHO African region. *Vaccine*  
50 877 2016;**34**:5170–4. doi:10.1016/j.vaccine.2016.05.060  
51  
52  
53  
54  
55  
56  
57  
58  
59  
60

- 1  
2  
3 878 141 Keegan R, Dabbagh A, Strebel PM, *et al.* Comparing measles with previous eradication  
4 879 programs: enabling and constraining factors. *J Infect Dis* 2011;**204**:S54–61.  
5 880 doi:10.1093/infdis/jir119  
6  
7 881 142 Levin A, Burgess C, Garrison LP, *et al.* Global Eradication of Measles: An Epidemiologic  
8 882 and Economic Evaluation. *J Infect Dis* 2011;**204**:S98–106. doi:10.1093/infdis/jir096  
9  
10 883 143 Thapa A, Khanal S, Sharapov U, *et al.* Progress Toward Measles Elimination - South-East  
11 884 Asia Region, 2003-2013. *MMWR Morb Mortal Wkly Rep* 2015;**64**:613–7.  
12 885 144 Tsega A, Daniel F, Steinglass R. Monitoring coverage of fully immunized children.  
13 886 *Vaccine* 2014;**32**:7047–9. doi:10.1016/j.vaccine.2014.10.057  
14 887 145 Hong R, Banta JE. Effects of extra immunization efforts on routine immunization at  
15 888 district level in Pakistan. *East Mediterr Heal J* 2005;**11**.  
16  
17 889 146 Krieger N, Smith GD. The tale wagged by the DAG: Broadening the scope of causal  
18 890 inference and explanation for epidemiology. *Int J Epidemiol* 2016;**45**:1787–808.  
19 891 doi:10.1093/ije/dyw114  
20  
21 892 147 Westreich D, Greenland S. The table 2 fallacy: Presenting and interpreting confounder  
22 893 and modifier coefficients. *Am J Epidemiol* 2013;**177**:292–8. doi:10.1093/aje/kws412  
23 894 148 Bandoli G, Palmsten K, Chambers CD, *et al.* Revisiting the Table 2 fallacy: A motivating  
24 895 example examining preeclampsia and preterm birth. *Paediatr Perinat Epidemiol*  
25 896 2018;**32**:390–7. doi:10.1111/ppe.12474  
26  
27 897 149 Bolton P, Hussain A, Hadpawat A, *et al.* Deficiencies in current childhood immunization  
28 898 indicators. *Public Heal Rep* 1998;**113**:527–32.  
29 899 150 Laubereau B, Hermann M, Schmitt HJ, *et al.* Detection of delayed vaccinations: a new  
30 900 approach to visualize vaccine uptake. *Epidemiol Infect* 2002;**128**:185–92.  
31  
32 901 151 Shrivastwa N, Gillespie BW, Lepkowski JM, *et al.* Vaccination Timeliness in Children  
33 902 under India's Universal Immunization Program. *Pediatr Infect Dis J* 2016;**35**:955–60.  
34 903 doi:10.1097/INF.0000000000001223  
35  
36 904 152 Dandona R, Pandey A, Dandona L. A review of national health surveys in India. *Bull*  
37 905 *World Heal Organ* 2016;**94**:286–96. doi:10.2471/BLT.15.158493  
38 906 153 UNICEF. Multiple Indicator Cluster Surveys. 2017.<http://mics.unicef.org/> (accessed 3 Oct  
39 907 2017).  
40 908 154 Wagner AL. The use and significance of vaccination cards. *Hum Vaccin Immunother*  
41 909 2019;**15**:2844–6. doi:10.1080/21645515.2019.1625647  
42  
43 910 155 Central Statistical Agency, The DHS Program. Ethiopia Demographic and Health Survey,  
44 911 2016. 2016.  
45 912  
46 913  
47 914  
48  
49  
50  
51  
52  
53  
54  
55  
56  
57  
58  
59  
60

1  
2  
3 915 Figure legends  
4

5 916

6 917 Figure 1. Diagram of studies' selection into a scoping review of vaccination studies using the  
7 918 Demographic and Health Surveys.

8 919

9 920 Figure 2. Map of countries by the number of published studies using Demographic and Health  
10 921 Survey (DHS) datasets. Shading corresponds to number of studies using DHS data from only  
11 922 one country; hash marks indicate a study using multiple countries.

12 923

13  
14 924 Figure 3. Commonly reported predictors of vaccination status used in studies using the  
15 925 Demographic and Health Survey.

16 926

17 927

18 928  
19  
20  
21  
22  
23  
24  
25  
26  
27  
28  
29  
30  
31  
32  
33  
34  
35  
36  
37  
38  
39  
40  
41  
42  
43  
44  
45  
46  
47  
48  
49  
50  
51  
52  
53  
54  
55  
56  
57  
58  
59  
60

1  
2  
3  
4  
5  
6  
7  
8  
9  
10  
11  
12  
13  
14  
15  
16  
17  
18  
19  
20  
21  
22  
23  
24  
25  
26  
27  
28  
29  
30  
31  
32  
33  
34  
35  
36  
37  
38  
39  
40  
41  
42  
43  
44  
45  
46  
47  
48  
49  
50  
51  
52  
53  
54  
55  
56  
57  
58  
59  
60

For peer review only

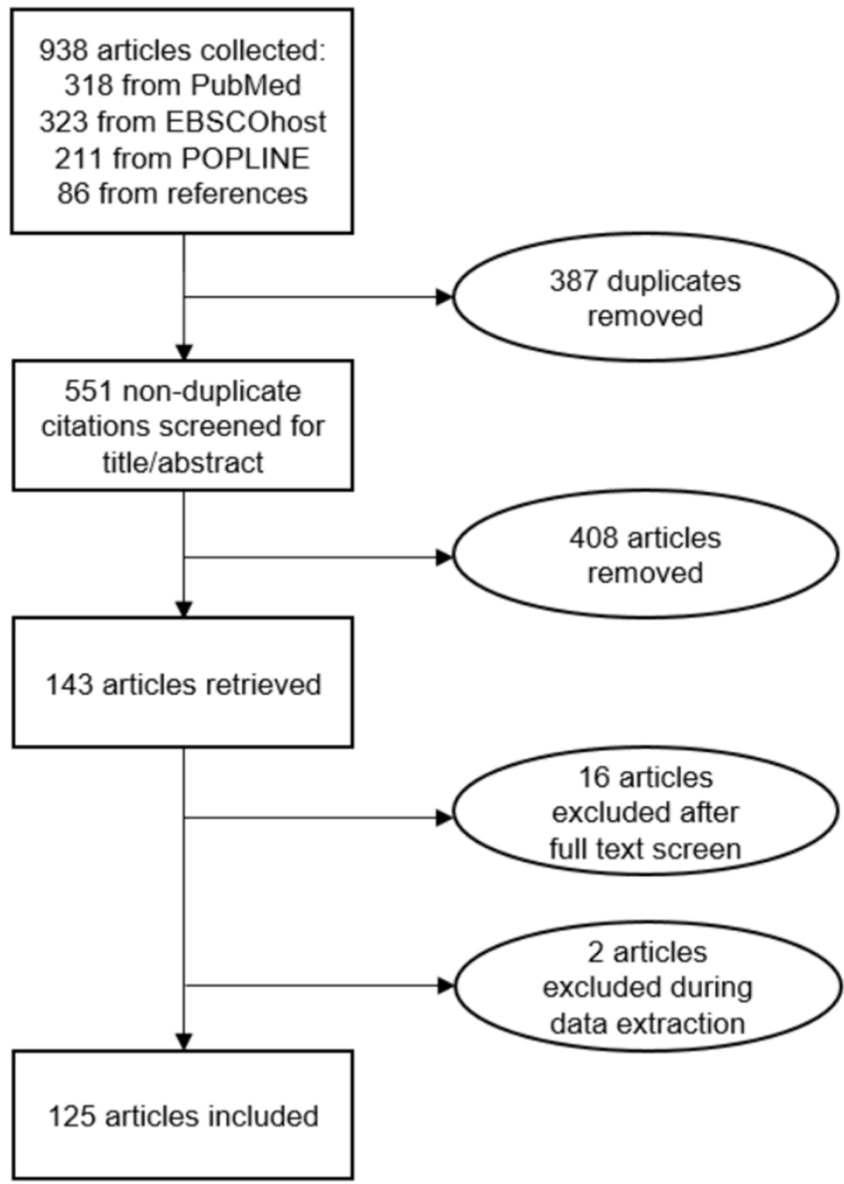

Diagram of studies' selection into a scoping review of vaccination studies using the Demographic and Health Surveys.

114x152mm (300 x 300 DPI)

1  
2  
3  
4  
5  
6  
7  
8  
9  
10  
11  
12  
13  
14  
15  
16  
17  
18  
19  
20  
21  
22  
23  
24  
25  
26  
27  
28  
29  
30  
31  
32  
33  
34  
35  
36  
37  
38  
39  
40  
41  
42  
43  
44  
45  
46  
47  
48  
49  
50  
51  
52  
53  
54  
55  
56  
57  
58  
59  
60

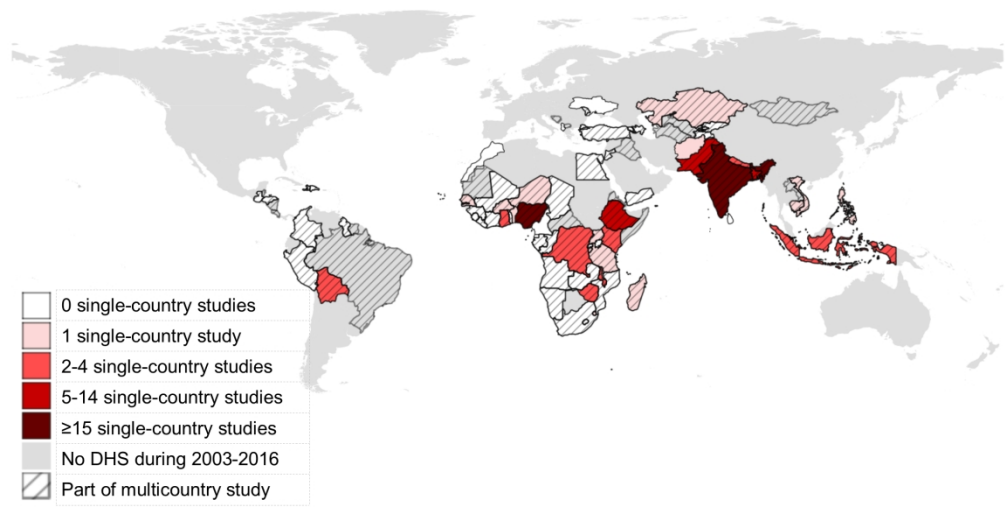

Map of countries by the number of published studies using Demographic and Health Survey (DHS) datasets. Shading corresponds to number of studies using DHS data from only one country; hash marks indicate a study using multiple countries.

190x101mm (300 x 300 DPI)

1  
2  
3  
4  
5  
6  
7  
8  
9  
10  
11  
12  
13  
14  
15  
16  
17  
18  
19  
20  
21  
22  
23  
24  
25  
26  
27  
28  
29  
30  
31  
32  
33  
34  
35  
36  
37  
38  
39  
40  
41  
42  
43  
44  
45  
46  
47  
48  
49  
50  
51  
52  
53  
54  
55  
56  
57  
58  
59  
60

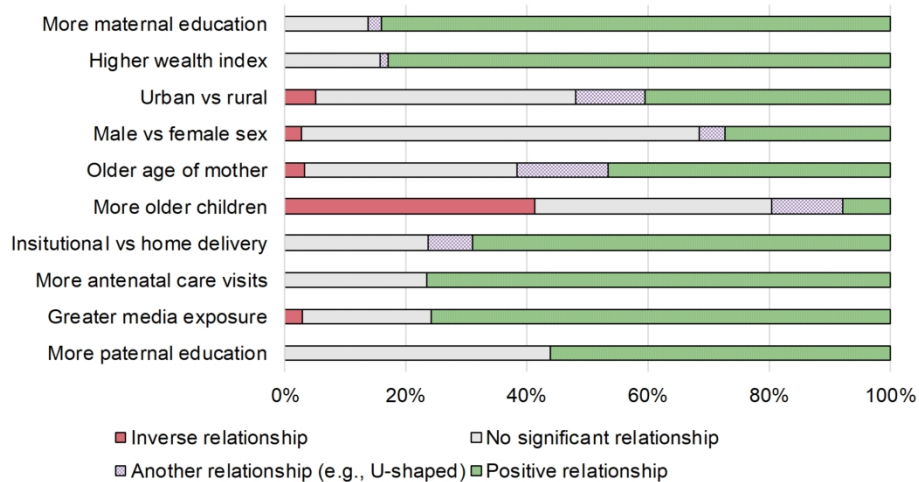

Commonly reported predictors of vaccination status used in studies using the Demographic and Health Survey.

190x101mm (300 x 300 DPI)



## Preferred Reporting Items for Systematic reviews and Meta-Analyses extension for Scoping Reviews (PRISMA-ScR) Checklist

| SECTION                                               | ITEM | PRISMA-ScR CHECKLIST ITEM                                                                                                                                                                                                                                                                                  | REPORTED ON PAGE # |
|-------------------------------------------------------|------|------------------------------------------------------------------------------------------------------------------------------------------------------------------------------------------------------------------------------------------------------------------------------------------------------------|--------------------|
| <b>TITLE</b>                                          |      |                                                                                                                                                                                                                                                                                                            |                    |
| Title                                                 | 1    | Identify the report as a scoping review.                                                                                                                                                                                                                                                                   | 1                  |
| <b>ABSTRACT</b>                                       |      |                                                                                                                                                                                                                                                                                                            |                    |
| Structured summary                                    | 2    | Provide a structured summary that includes (as applicable): background, objectives, eligibility criteria, sources of evidence, charting methods, results, and conclusions that relate to the review questions and objectives.                                                                              | 2                  |
| <b>INTRODUCTION</b>                                   |      |                                                                                                                                                                                                                                                                                                            |                    |
| Rationale                                             | 3    | Describe the rationale for the review in the context of what is already known. Explain why the review questions/objectives lend themselves to a scoping review approach.                                                                                                                                   | 3-4                |
| Objectives                                            | 4    | Provide an explicit statement of the questions and objectives being addressed with reference to their key elements (e.g., population or participants, concepts, and context) or other relevant key elements used to conceptualize the review questions and/or objectives.                                  | 4                  |
| <b>METHODS</b>                                        |      |                                                                                                                                                                                                                                                                                                            |                    |
| Protocol and registration                             | 5    | Indicate whether a review protocol exists; state if and where it can be accessed (e.g., a Web address); and if available, provide registration information, including the registration number.                                                                                                             | N/A, 4             |
| Eligibility criteria                                  | 6    | Specify characteristics of the sources of evidence used as eligibility criteria (e.g., years considered, language, and publication status), and provide a rationale.                                                                                                                                       | 4                  |
| Information sources*                                  | 7    | Describe all information sources in the search (e.g., databases with dates of coverage and contact with authors to identify additional sources), as well as the date the most recent search was executed.                                                                                                  | 4                  |
| Search                                                | 8    | Present the full electronic search strategy for at least 1 database, including any limits used, such that it could be repeated.                                                                                                                                                                            | 4                  |
| Selection of sources of evidence†                     | 9    | State the process for selecting sources of evidence (i.e., screening and eligibility) included in the scoping review.                                                                                                                                                                                      | 4-5                |
| Data charting process‡                                | 10   | Describe the methods of charting data from the included sources of evidence (e.g., calibrated forms or forms that have been tested by the team before their use, and whether data charting was done independently or in duplicate) and any processes for obtaining and confirming data from investigators. | 5                  |
| Data items                                            | 11   | List and define all variables for which data were sought and any assumptions and simplifications made.                                                                                                                                                                                                     | 5                  |
| Critical appraisal of individual sources of evidence§ | 12   | If done, provide a rationale for conducting a critical appraisal of included sources of evidence; describe the methods used and how this information was used in any data synthesis (if appropriate).                                                                                                      | 5                  |

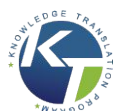

| SECTION                                       | ITEM | PRISMA-ScR CHECKLIST ITEM                                                                                                                                                                       | REPORTED ON PAGE # |
|-----------------------------------------------|------|-------------------------------------------------------------------------------------------------------------------------------------------------------------------------------------------------|--------------------|
| Synthesis of results                          | 13   | Describe the methods of handling and summarizing the data that were charted.                                                                                                                    | 6                  |
| <b>RESULTS</b>                                |      |                                                                                                                                                                                                 |                    |
| Selection of sources of evidence              | 14   | Give numbers of sources of evidence screened, assessed for eligibility, and included in the review, with reasons for exclusions at each stage, ideally using a flow diagram.                    | 7                  |
| Characteristics of sources of evidence        | 15   | For each source of evidence, present characteristics for which data were charted and provide the citations.                                                                                     | 7-8                |
| Critical appraisal within sources of evidence | 16   | If done, present data on critical appraisal of included sources of evidence (see item 12).                                                                                                      | 7                  |
| Results of individual sources of evidence     | 17   | For each included source of evidence, present the relevant data that were charted that relate to the review questions and objectives.                                                           | 7                  |
| Synthesis of results                          | 18   | Summarize and/or present the charting results as they relate to the review questions and objectives.                                                                                            | 7-8                |
| <b>DISCUSSION</b>                             |      |                                                                                                                                                                                                 |                    |
| Summary of evidence                           | 19   | Summarize the main results (including an overview of concepts, themes, and types of evidence available), link to the review questions and objectives, and consider the relevance to key groups. | 8                  |
| Limitations                                   | 20   | Discuss the limitations of the scoping review process.                                                                                                                                          | 10                 |
| Conclusions                                   | 21   | Provide a general interpretation of the results with respect to the review questions and objectives, as well as potential implications and/or next steps.                                       | 10                 |
| <b>FUNDING</b>                                |      |                                                                                                                                                                                                 |                    |
| Funding                                       | 22   | Describe sources of funding for the included sources of evidence, as well as sources of funding for the scoping review. Describe the role of the funders of the scoping review.                 | 12                 |

JBI = Joanna Briggs Institute; PRISMA-ScR = Preferred Reporting Items for Systematic reviews and Meta-Analyses extension for Scoping Reviews.

\* Where *sources of evidence* (see second footnote) are compiled from, such as bibliographic databases, social media platforms, and Web sites.

† A more inclusive/heterogeneous term used to account for the different types of evidence or data sources (e.g., quantitative and/or qualitative research, expert opinion, and policy documents) that may be eligible in a scoping review as opposed to only studies. This is not to be confused with *information sources* (see first footnote).

‡ The frameworks by Arksey and O'Malley (6) and Levac and colleagues (7) and the JBI guidance (4, 5) refer to the process of data extraction in a scoping review as data charting.

§ The process of systematically examining research evidence to assess its validity, results, and relevance before using it to inform a decision. This term is used for items 12 and 19 instead of "risk of bias" (which is more applicable to systematic reviews of interventions) to include and acknowledge the various sources of evidence that may be used in a scoping review (e.g., quantitative and/or qualitative research, expert opinion, and policy document).

From: Tricco AC, Lillie E, Zarin W, O'Brien KK, Colquhoun H, Levac D, et al. PRISMA Extension for Scoping Reviews (PRISMA-ScR): Checklist and Explanation. *Ann Intern Med.* 2018;169:467–473. doi: [10.7326/M18-0850](https://doi.org/10.7326/M18-0850).



St. Michael's

Inspired Care.  
Inspiring Science.

For peer review only - <http://bmjopen.bmj.com/site/about/guidelines.xhtml>
